# Supplementary material
Source: publisher figshare collection journal article supplement (https://gsajournals.figshare.com/articles/dataset/_/11862216)
Supplement: Supplementary file 1 [file 2]

## Sheet: Contents
	Sheet Name	Description
1	List of tDNAs	From Osmundson et al., 2016 Supplementary Table S1
2	Forks L>R 93 tDNAs	Fraction of forks moving left to right around a meta tDNA in 100bp bins, including forks moving right to left but bioinformatically reoriented L>R. Only includes tDNAs ≥5kb away from origins and sequence gaps.
3	Forks L>R HO tDNAs	Same as sheet 2, but only including tDNAs transcribed head-on to the replication fork (n=39)
4	Forks L>R CD tDNAs	Same as sheet 2, but only including tDNAs transcribed co-directionally with the replication fork (n=54)
5	Change in fork dir around 93 tDNAs	Average change in the fraction of forks moving in a given direction 1-3kb upstream vs. downstream of the meta tDNA. Only includes tDNAs ≥5kb away from origins and sequence gaps.
6	Change in fork dir around HO tDNAs	Same as sheet 5, but only including tDNAs transcribed head-on to the replication fork (n=39)
7	Change in fork dir around CD tDNAs	Same as sheet 5, but only including tDNAs transcribed co-directionally with the replication fork (n=54)

## Sheet: List of tDNAs
Chr	Mid	Start	Stop	Strand	Gene	Direction of fork	Included in analysis	Fork/Transcription
1	139203	139152	139254	W	tP(UGG)A	L	+	anti
1	166303	166267	166339	W	tA(UGC)A	R	-	co
1	181197	181141	181254	W	tL(CAA)A	R	+	co
1	182562	182603	182522	C	tS(AGA)A	R	+	anti
2	643042	643078	643007	C	tC(GCA)B	R	+	anti
2	266414	266378	266450	W	tT(AGU)B	R	-	co
2	645202	645167	645238	W	tE(UUC)B	R	+	co
2	9624	9583	9666	W	tL(UAA)B1	R	-	co
2	350862	350827	350898	W	tQ(UUG)B	R	-	co
2	227115	227075	227156	W	tS(AGA)B	L	-	anti
2	197530	197494	197567	W	tI(AAU)B	L	-	anti
2	405913	405878	405949	W	tR(UCU)B	L	-	anti
2	326828	326865	326792	C	tV(UAC)B	R	-	anti
2	347644	347603	347686	W	tL(UAA)B2	R	+	co
2	405995	405960	406031	W	tD(GUC)B	L	-	anti
2	36443	36398	36488	W	tF(GAA)B	L	-	anti
2	197664	197699	197629	C	tG(GCC)B	L	-	co
3	82497	82533	82462	C	tE(UUC)C	R	-	anti
3	127752	127716	127789	W	tN(GUU)C	L	-	anti
3	168336	168372	168301	C	tQ(UUG)C	R	-	anti
3	295520	295484	295556	W	tT(AGU)C	R	-	co
3	142736	142771	142701	C	tG(GCC)C	R	+	anti
3	227992	227942	228042	W	tS(CGA)C	R	-	co
3	123612	123648	123577	C	tP(AGG)C	R	-	anti
3	149955	149920	149991	W	tM(CAU)C	R	-	co
3	90915	90859	90972	W	tL(CAA)C	L	-	anti
3	151320	151356	151284	C	tK(CUU)C	L	-	co
4	519784	519743	519826	W	tL(UAA)D	R	-	co
4	521007	520972	521043	W	tQ(UUG)D1	R	-	co
4	359624	359577	359672	W	tK(UUU)D	R	+	co
4	1175865	1175829	1175901	W	tM(CAU)D	R	+	co
4	620005	620041	619969	C	tR(ACG)D	L	-	co
4	83583	83548	83618	W	tG(GCC)D1	L	-	anti
4	488833	488870	488797	C	tV(UAC)D	R	+	anti
4	1017242	1017278	1017207	C	tE(CUC)D	R	-	anti
4	1257043	1257079	1257008	C	tG(CCC)D	R	-	anti
4	1075508	1075544	1075472	C	tV(CAC)D	R	+	anti
4	1305671	1305630	1305712	W	tS(AGA)D3	R	-	co
4	437812	437772	437853	W	tS(AGA)D1	R	-	co
4	410415	410379	410451	W	tA(AGC)D	R	-	co
4	568917	568882	568953	W	tR(UCU)D	R	-	co
4	1352502	1352538	1352466	C	tK(CUU)D2	L	-	co
4	568999	568964	569035	W	tD(GUC)D	R	-	co
4	1201786	1201750	1201822	W	tK(CUU)D1	R	+	co
4	946356	946312	946400	W	tY(GUA)D	R	+	co
4	1461772	1461829	1461715	C	tL(CAA)D	L	-	co
4	884427	884361	884493	W	tI(UAU)D	R	-	co
4	992867	992832	992902	W	tG(GCC)D2	L	-	anti
4	1150891	1150941	1150842	C	tX(XXX)D	L	-	co
4	434300	434336	434264	C	tT(AGU)D	L	-	co
4	1095415	1095461	1095370	C	tF(GAA)D	L	-	co
4	981014	981055	980974	C	tS(AGA)D2	L	-	co
4	645188	645224	645153	C	tQ(UUG)D2	R	-	anti
4	802766	802802	802731	C	tQ(UUG)D3	L	-	co
4	668043	668080	668007	C	tI(AAU)D	R	-	anti
5	138701	138666	138737	W	tR(UCU)E	L	+	anti
5	469493	469457	469530	W	tV(AAC)E2	R	-	co
5	86644	86604	86685	W	tS(AGA)E	L	+	anti
5	100168	100133	100204	W	tM(CAU)E	R	+	co
5	250321	250286	250357	W	tQ(UUG)E1	L	-	anti
5	207392	207357	207428	W	tH(GUG)E1	L	-	anti
5	131117	131153	131082	C	tQ(UUG)E2	L	+	co
5	288483	288524	288443	C	tS(UGA)E	R	-	anti
5	487366	487402	487331	C	tE(UUC)E3	L	+	co
5	177134	177099	177170	W	tE(UUC)E1	R	-	co
5	551321	551358	551285	C	tI(AAU)E2	R	-	anti
5	354969	354934	355005	W	tE(UUC)E2	R	-	co
5	312059	312095	312023	C	tA(UGC)E	L	-	co
5	438736	438700	438773	W	tV(AAC)E1	L	-	anti
5	135461	135497	135425	C	tK(CUU)E1	L	+	co
5	435788	435824	435752	C	tK(CUU)E2	L	-	co
5	443238	443275	443202	C	tI(AAU)E1	R	-	anti
5	61925	61960	61890	C	tG(GCC)E	R	-	anti
5	434576	434612	434541	C	tH(GUG)E2	L	+	co
5	492388	492424	492352	C	tR(ACG)E	L	-	co
6	162263	162228	162298	W	tG(GCC)F1	L	+	anti
6	167481	167437	167525	W	tY(GUA)F1	L	-	anti
6	101427	101376	101478	W	tP(UGG)F	L	+	anti
6	181009	181044	180974	C	tG(GCC)F2	R	-	anti
6	204960	204996	204924	C	tA(AGC)F	R	+	anti
6	226724	226760	226688	C	tK(CUU)F	R	+	anti
6	210663	210707	210619	C	tY(GUA)F2	R	+	anti
6	137522	137559	137486	C	tN(GUU)F	R	-	anti
6	157961	158007	157916	C	tF(GAA)F	L	+	co
6	191563	191613	191513	C	tS(GCU)F	L	+	co
7	794453	794417	794489	W	tA(UGC)G	R	+	co
7	823518	823482	823555	W	tV(AAC)G2	L	-	anti
7	876430	876394	876466	W	tK(CUU)G3	L	+	anti
7	736375	736340	736411	W	tR(UCU)G3	L	-	anti
7	731173	731137	731210	W	tN(GUU)G	L	-	anti
7	845684	845649	845719	W	tG(GCC)G1	R	+	co
7	700715	700675	700756	W	tL(GAG)G	L	+	anti
7	930988	931023	930953	C	tG(GCC)G2	R	+	anti
7	328618	328583	328654	W	tE(UUC)G1	R	-	co
7	73865	73902	73829	C	tV(AAC)G3	R	+	anti
7	779651	779616	779687	W	tG(UCC)G	R	-	co
7	122305	122269	122341	W	tK(CUU)G1	R	-	co
7	440761	440807	440716	C	tF(GAA)G	R	+	anti
7	185750	185786	185714	C	tK(CUU)G2	L	+	co
7	205577	205521	205634	W	tL(CAA)G1	R	-	co
7	544612	544648	544577	C	tD(GUC)G2	L	-	co
7	828758	828794	828723	C	tR(UCU)G2	L	+	co
7	857434	857491	857378	C	tL(CAA)G3	R	+	anti
7	319816	319781	319852	W	tH(GUG)G2	R	-	co
7	541885	541850	541921	W	tE(UUC)G3	L	-	anti
7	405505	405470	405541	W	tR(UCU)G1	L	-	anti
7	739158	739122	739195	W	tI(AAU)G	L	-	anti
7	661784	661749	661820	W	tT(UGU)G1	R	-	co
7	412330	412367	412294	C	tV(AAC)G1	L	+	co
7	1004251	1004216	1004287	W	tT(UGU)G2	R	-	co
7	774385	774349	774421	W	tA(AGC)G	L	+	anti
7	701000	701048	700953	C	tK(UUU)G2	L	+	co
7	115535	115488	115583	W	tK(UUU)G1	R	-	co
7	878762	878815	878710	C	tW(CCA)G2	L	+	co
7	110660	110696	110625	C	tH(GUG)G1	L	-	co
7	531645	531610	531681	W	tD(GUC)G1	R	+	co
7	423148	423092	423205	W	tL(CAA)G2	R	-	co
7	561702	561743	561662	C	tS(AGA)G	L	-	co
7	401562	401598	401527	C	tE(UUC)G2	R	-	anti
7	287402	287455	287350	C	tW(CCA)G1	R	-	anti
7	707143	707179	707108	C	tC(GCA)G	L	-	co
8	62790	62755	62826	W	tH(GUG)H	L	-	anti
8	467025	466990	467061	W	tT(UGU)H	R	+	co
8	134356	134321	134392	W	tQ(UUG)H	R	-	co
8	133066	133107	133026	C	tS(AGA)H	L	-	co
8	475742	475778	475706	C	tV(CAC)H	R	-	anti
8	237893	237939	237848	C	tF(GAA)H1	L	+	co
8	116143	116179	116107	C	tT(AGU)H	L	-	co
8	85334	85371	85298	C	tV(AAC)H	L	-	co
8	358523	358569	358478	C	tF(GAA)H2	L	-	co
8	388944	388995	388893	C	tP(UGG)H	L	-	co
8	146278	146314	146242	C	tA(AGC)H	R	+	anti
9	370452	370417	370488	W	tE(UUC)I	R	+	co
9	175067	175031	175103	W	tT(AGU)I1	L	-	anti
9	210701	210665	210738	W	tI(AAU)I2	L	-	anti
9	197627	197592	197663	W	tE(CUC)I	L	+	anti
9	325784	325748	325820	W	tT(AGU)I2	L	-	anti
9	336384	336420	336349	C	tD(GUC)I2	L	+	co
9	300264	300300	300228	C	tK(CUU)I	L	+	co
9	183476	183513	183440	C	tI(AAU)I1	L	-	co
9	324338	324374	324303	C	tD(GUC)I1	L	-	co
9	248890	248850	248931	W	tS(UGA)I	R	-	co
10	391079	391115	391043	C	tM(CAU)J1	R	+	anti
10	531863	531828	531898	W	tG(GCC)J2	L	+	anti
10	59136	59172	59100	C	tT(AGU)J	L	+	co
10	396761	396796	396726	C	tG(GCC)J1	L	-	co
10	541543	541508	541579	W	tD(GUC)J4	R	-	co
10	115974	116010	115939	C	tE(UUC)J	R	-	anti
10	524052	524093	524012	C	tS(AGA)J	L	+	co
10	204770	204735	204806	W	tD(GUC)J1	R	-	co
10	543000	543044	542956	C	tY(GUA)J2	R	-	anti
10	355409	355374	355445	W	tR(UCU)J1	L	-	anti
10	422973	422937	423009	W	tM(CAU)J2	R	+	co
10	354288	354244	354332	W	tY(GUA)J1	L	-	anti
10	415002	414966	415038	W	tK(CUU)J	L	-	anti
10	355491	355456	355527	W	tD(GUC)J2	L	-	anti
10	233975	233939	234011	W	tR(ACG)J	R	+	co
10	424473	424515	424432	C	tL(UAA)J	R	+	anti
10	378396	378360	378433	W	tV(AAC)J	R	-	co
10	374459	374495	374424	C	tD(GUC)J3	L	-	co
10	517848	517884	517813	C	tM(CAU)J3	L	+	co
10	617969	617919	618019	W	tL(UAG)J	R	+	co
10	538590	538555	538626	W	tR(CCU)J	L	-	anti
10	197349	197385	197313	C	tA(AGC)J	L	+	co
10	374541	374577	374506	C	tR(UCU)J2	L	-	co
10	415983	416036	415931	C	tW(CCA)J	L	-	co
11	518024	517988	518060	W	tA(AGC)K2	R	-	co
11	379716	379680	379753	W	tV(AAC)K2	L	-	anti
11	162522	162558	162487	C	tR(UCU)K	R	+	anti
11	84249	84208	84291	W	tL(UAA)K	R	-	co
11	203035	202999	203071	W	tK(CUU)K	R	-	co
11	308180	308217	308144	C	tV(AAC)K1	R	+	anti
11	513367	513403	513332	C	tD(GUC)K	L	+	co
11	579012	578965	579060	W	tK(UUU)K	L	-	anti
11	74660	74624	74697	W	tN(GUU)K	R	+	co
11	491004	490968	491040	W	tR(ACG)K	R	-	co
11	46770	46806	46735	C	tT(CGU)K	L	+	co
11	302970	302918	303023	W	tW(CCA)K	R	-	co
11	458613	458557	458670	W	tL(CAA)K	R	-	co
11	219931	219895	219967	W	tA(AGC)K1	R	+	co
11	141053	141089	141018	C	tE(UUC)K	L	+	co
11	313436	313472	313401	C	tH(GUG)K	R	+	anti
12	793953	793918	793989	W	tD(GUC)L2	L	-	anti
12	976019	976056	975983	C	tN(GUU)L	L	-	co
12	734838	734802	734875	W	tI(AAU)L1	R	-	co
12	427167	427132	427203	W	tD(GUC)L1	R	+	co
12	797213	797178	797249	W	tE(UUC)L	R	-	co
12	592569	592619	592519	C	tL(UAG)L1	L	-	co
12	687895	687932	687859	C	tV(AAC)L	R	-	anti
12	628440	628383	628497	W	tL(CAA)L	R	+	co
12	448685	448721	448650	C	tQ(UUG)L	L	-	co
12	92599	92548	92650	W	tP(UGG)L	R	-	co
12	167984	168025	167944	C	tS(AGA)L	R	+	anti
12	875423	875376	875471	W	tK(UUU)L	L	+	anti
12	1052107	1052144	1052071	C	tI(AAU)L2	L	+	co
12	214919	214955	214883	C	tA(UGC)L	L	-	co
12	656970	657006	656934	C	tA(AGC)L	L	-	co
12	818644	818609	818680	W	tR(CCG)L	R	+	co
12	374391	374355	374427	W	tR(ACG)L	R	-	co
12	963013	963055	962972	C	tL(UAA)L	R	+	anti
12	784403	784354	784453	W	tS(GCU)L	L	+	anti
12	605366	605432	605300	C	tI(UAU)L	R	-	anti
12	732140	732090	732190	W	tL(UAG)L2	R	-	co
13	168839	168795	168883	W	tY(GUA)M1	L	+	anti
13	480657	480693	480621	C	tK(CUU)M	L	-	co
13	747927	747963	747892	C	tR(UCU)M1	L	-	co
13	363099	363064	363135	W	tH(GUG)M	L	-	anti
13	808281	808317	808246	C	tQ(CUG)M	L	+	co
13	504951	504895	505008	W	tL(CAA)M	R	-	co
13	586672	586709	586636	C	tV(AAC)M3	L	-	co
13	290836	290801	290872	W	tE(UUC)M	R	-	co
13	837972	837928	838016	W	tY(GUA)M2	R	+	co
13	463589	463554	463625	W	tD(GUC)M	L	-	anti
13	321183	321219	321147	C	tA(AGC)M1	R	+	anti
13	131860	131896	131825	C	tR(UCU)M2	L	+	co
13	420624	420661	420588	C	tV(AAC)M2	L	-	co
13	572919	572955	572883	C	tM(CAU)M	R	+	anti
13	183933	183968	183898	C	tG(GCC)M	R	-	anti
13	372481	372518	372445	C	tV(AAC)M1	R	-	anti
13	352325	352280	352370	W	tF(GAA)M	L	+	anti
13	259198	259239	259158	C	tS(AGA)M	L	+	co
13	379355	379408	379303	C	tW(CCA)M	R	-	anti
13	196119	196170	196068	C	tP(UGG)M	R	-	anti
13	768405	768441	768369	C	tA(AGC)M2	L	-	co
14	443062	443006	443119	W	tL(CAA)N	L	-	anti
14	631881	631917	631846	C	tP(AGG)N	L	-	co
14	602348	602312	602385	W	tI(AAU)N2	L	-	anti
14	560729	560765	560693	C	tT(AGU)N2	L	-	co
14	374914	374869	374959	W	tF(GAA)N	R	+	co
14	569903	569940	569867	C	tI(AAU)N1	R	-	anti
14	568166	568115	568217	W	tP(UGG)N2	R	-	co
14	547145	547094	547196	W	tP(UGG)N1	R	-	co
14	102752	102716	102789	W	tN(GUU)N1	R	-	co
14	632635	632599	632672	W	tN(GUU)N2	L	-	anti
14	104841	104805	104877	W	tT(AGU)N1	R	-	co
14	96276	96312	96241	C	tG(UCC)N	R	-	anti
14	726175	726217	726134	C	tL(UAA)N	L	-	co
14	519134	519169	519099	C	tD(GUC)N	L	-	co
15	571993	571958	572029	W	tD(GUC)O	R	-	co
15	113838	113802	113874	W	tT(AGU)O1	L	-	anti
15	301147	301097	301198	W	tP(UGG)O1	R	-	co
15	226646	226681	226611	C	tG(GCC)O1	L	-	co
15	274723	274673	274773	W	tS(GCU)O	L	-	anti
15	354077	354113	354041	C	tT(AGU)O2	R	+	anti
15	976457	976421	976493	W	tM(CAU)O2	L	-	anti
15	282199	282164	282234	W	tG(GCC)O2	R	-	co
15	710236	710201	710272	W	tM(CAU)O1	R	-	co
15	487475	487439	487512	W	tN(GUU)O2	L	-	anti
15	464500	464450	464551	W	tP(UGG)O2	R	-	co
15	228367	228331	228404	W	tN(GUU)O1	R	-	co
15	594389	594425	594354	C	tG(CCC)O	L	-	co
15	340335	340371	340299	C	tR(ACG)O	R	-	anti
15	438690	438643	438738	W	tK(UUU)O	R	-	co
15	110997	111033	110962	C	tG(UCC)O	L	-	co
15	663848	663885	663812	C	tV(AAC)O	R	-	anti
15	288236	288192	288280	W	tY(GUA)O	R	+	co
15	980735	980683	980787	W	tP(UGG)O3	L	-	anti
15	854223	854259	854187	C	tA(UGC)O	L	-	co
16	819565	819529	819602	W	tI(AAU)P1	R	-	co
16	810712	810676	810749	W	tN(GUU)P	L	-	anti
16	572304	572269	572339	W	tG(GCC)P1	R	+	co
16	744319	744284	744355	W	tT(UGU)P	L	+	anti
16	860414	860379	860449	W	tG(GCC)P2	R	-	co
16	689605	689565	689646	W	tS(UGA)P	R	+	co
16	775800	775836	775765	C	tC(GCA)P2	L	-	co
16	880332	880369	880296	C	tI(AAU)P2	L	-	co
16	582098	582062	582134	W	tK(CUU)P	R	+	co
16	435928	435964	435893	C	tC(GCA)P1	R	-	anti
16	338883	338919	338848	C	tM(CAU)P	R	+	anti
16	622585	622631	622540	C	tF(GAA)P2	L	+	co
16	210227	210263	210192	C	tE(UUC)P	L	-	co
16	856938	856902	856974	W	tA(AGC)P	R	-	co
16	560243	560289	560198	C	tF(GAA)P1	L	-	co
16	56221	56274	56169	C	tW(CCA)P	L	-	co
16	769254	769302	769207	C	tK(UUU)P	L	+	co

## Sheet: Forks L>R 93 tDNAs
bp_from_tDNA	rrm3_AA_1	rrm3_AA_2	rrm3_AA_2.1	rpc25_rrm3_1	rpc25_rrm3_2	rpc25_rrm3_3	rpc25_rpc82_rrm3_1	rpc25_rpc82_rrm3_2	rpc25_rpc82_rrm3_3	bdp1_rrm3_1	bdp1_rrm3_2	bdp1_rrm3_3	anchor_away_1	anchor_away_2	anchor_away_3	rrm3KO_1	rrm3KO_2	rrm3KO_3	TLS_rrm3_1	TLS_rrm3_2	TLS_rrm3_3	rad18_rrm3_1	rad18_rrm3_2	rad18_rrm3_3	brn1_rrm3_1	brn1_rrm3_2	brn1_rrm3_2techrep	KO_wt_bkg_1	KO_wt_bkg_2	KO_wt_bkg_3	top1_rrm3_1	top1_rrm3_2	top1_rrm3_3	top2_rrm3_1	top2_rrm3_2	top2_rrm3_3	top1_top2_rrm3_1	top1_top2_rrm3_2	top1_top2_rrm3_3
-4900	0.817916	0.839796	0.834999	0.822969	0.7368	0.780409	0.777308	0.749832	0.706599	0.80582	0.778324	0.774351	0.845968	0.837437	0.822126	0.817444	0.861805	0.849201	0.864213	0.822688	0.836506	0.79162	0.833656	0.779829	0.835879	0.823678	0.798639	0.847422	0.863841	0.8268	0.757517	0.723029	0.742919	0.765414	0.756878	0.713481	0.578952	0.706172	0.729426
-4800	0.828369	0.846138	0.842426	0.829335	0.730623	0.781078	0.780648	0.762744	0.737878	0.817	0.799403	0.774666	0.84972	0.836942	0.823508	0.819322	0.869372	0.854271	0.872582	0.822431	0.846207	0.803713	0.842226	0.787405	0.842618	0.826668	0.798509	0.851182	0.868845	0.832041	0.745791	0.71066	0.735827	0.759119	0.751268	0.712868	0.564944	0.708339	0.735149
-4700	0.838226	0.849496	0.846361	0.835077	0.730589	0.779858	0.780003	0.770571	0.739239	0.825596	0.797737	0.77728	0.858773	0.840189	0.826367	0.825248	0.875808	0.86054	0.88104	0.823001	0.856067	0.811778	0.843118	0.788046	0.848002	0.827824	0.80202	0.859403	0.87111	0.838464	0.74123	0.710231	0.731913	0.758451	0.7555	0.715938	0.553594	0.715946	0.739255
-4600	0.842661	0.856513	0.849325	0.837647	0.738575	0.783803	0.777246	0.773378	0.74347	0.82631	0.784376	0.788108	0.861728	0.848917	0.833048	0.833054	0.876797	0.861592	0.885732	0.830738	0.860849	0.81189	0.84759	0.789699	0.852719	0.829872	0.807058	0.868555	0.873806	0.848362	0.745455	0.730377	0.736429	0.771313	0.770396	0.721374	0.565838	0.714715	0.740488
-4500	0.838001	0.866405	0.852111	0.842247	0.747357	0.79329	0.790169	0.777148	0.738025	0.823617	0.773366	0.804741	0.869291	0.855671	0.84129	0.842593	0.886417	0.876953	0.888814	0.840842	0.85855	0.813336	0.85538	0.798584	0.854494	0.830257	0.811589	0.878448	0.889834	0.856762	0.748819	0.744437	0.757866	0.781067	0.774587	0.728068	0.580607	0.722086	0.742411
-4400	0.85093	0.871527	0.858556	0.846944	0.755298	0.804336	0.795168	0.778087	0.735728	0.824352	0.784604	0.812251	0.869826	0.861112	0.84876	0.847564	0.895738	0.891739	0.893904	0.846612	0.861607	0.818266	0.855281	0.794529	0.85517	0.835066	0.818394	0.884706	0.902602	0.864571	0.75563	0.753233	0.762357	0.778945	0.781122	0.7345	0.583232	0.725321	0.743746
-4300	0.854859	0.876482	0.870009	0.856316	0.76195	0.814739	0.801627	0.787098	0.732383	0.834527	0.79925	0.814681	0.872467	0.866804	0.858869	0.853104	0.90208	0.897601	0.907959	0.847872	0.871344	0.829872	0.863741	0.803971	0.862023	0.840188	0.831744	0.891394	0.909281	0.87333	0.765632	0.75802	0.775563	0.781285	0.784336	0.737961	0.589662	0.73473	0.750585
-4200	0.857492	0.877195	0.873005	0.859095	0.765755	0.818608	0.806591	0.793681	0.736363	0.842951	0.799831	0.819269	0.878314	0.873714	0.861995	0.856068	0.902413	0.901394	0.911129	0.851395	0.875267	0.836137	0.867887	0.81137	0.865042	0.847538	0.832151	0.896182	0.913037	0.874943	0.770263	0.759797	0.781679	0.787979	0.783794	0.739398	0.588801	0.732406	0.750456
-4100	0.856005	0.877511	0.874135	0.854676	0.761794	0.816929	0.801794	0.792334	0.738967	0.846529	0.791872	0.811585	0.879664	0.871856	0.858414	0.856806	0.904842	0.897811	0.912289	0.854173	0.877275	0.836166	0.87518	0.809684	0.867386	0.853245	0.830896	0.89904	0.910589	0.864539	0.77144	0.753614	0.771294	0.789767	0.780714	0.741919	0.579512	0.731646	0.748088
-4000	0.866641	0.87841	0.875682	0.858667	0.758221	0.813548	0.805514	0.786751	0.739627	0.846751	0.799274	0.815841	0.882219	0.873663	0.85794	0.859363	0.906254	0.896466	0.913324	0.851976	0.882495	0.827767	0.872197	0.808837	0.87051	0.857306	0.83017	0.901486	0.912433	0.861115	0.774593	0.74462	0.770566	0.795416	0.786349	0.737447	0.578832	0.733309	0.748644
-3900	0.872718	0.885307	0.874695	0.864411	0.757965	0.816118	0.81036	0.783631	0.742126	0.848722	0.799774	0.816559	0.888575	0.880982	0.866854	0.862704	0.910465	0.902418	0.919248	0.857811	0.890194	0.828176	0.874195	0.814714	0.872525	0.857308	0.830866	0.901133	0.917338	0.863011	0.776194	0.751251	0.770532	0.790838	0.794013	0.740031	0.580724	0.737819	0.752779
-3800	0.874782	0.891785	0.881339	0.8704	0.770906	0.819457	0.814165	0.793256	0.759	0.856141	0.829956	0.827453	0.895068	0.886737	0.87642	0.865416	0.911917	0.908936	0.923459	0.865239	0.890536	0.838626	0.878331	0.821618	0.876817	0.863284	0.841011	0.903735	0.917116	0.872708	0.783791	0.770067	0.774614	0.801635	0.802918	0.756883	0.596615	0.745003	0.758968
-3700	0.866072	0.894279	0.885801	0.874348	0.786717	0.827854	0.819599	0.79834	0.75107	0.858477	0.839019	0.835207	0.896585	0.887494	0.877756	0.865762	0.915668	0.912932	0.924195	0.871476	0.884727	0.847025	0.882696	0.825243	0.881355	0.874297	0.849284	0.906171	0.921826	0.885109	0.788342	0.78098	0.790272	0.809326	0.808262	0.768923	0.604211	0.746284	0.762728
-3600	0.876803	0.892157	0.879941	0.871341	0.782987	0.829595	0.817392	0.798644	0.75036	0.853588	0.836621	0.826888	0.895765	0.883931	0.872795	0.861708	0.914225	0.909004	0.921707	0.872872	0.882631	0.839525	0.881361	0.824514	0.881333	0.872433	0.845952	0.902165	0.919709	0.883521	0.782631	0.772193	0.788292	0.806676	0.802466	0.757575	0.599051	0.743765	0.762713
-3500	0.875133	0.889091	0.877662	0.865703	0.775079	0.827602	0.810364	0.796154	0.748585	0.849503	0.812425	0.819861	0.889774	0.881443	0.868309	0.85947	0.91484	0.903861	0.917687	0.873221	0.884279	0.841626	0.88026	0.818636	0.878195	0.86617	0.837709	0.900828	0.916154	0.878241	0.778414	0.761911	0.780897	0.798627	0.796555	0.754061	0.594946	0.738946	0.756587
-3400	0.873912	0.887625	0.87838	0.865171	0.766461	0.821178	0.803514	0.794055	0.744225	0.853335	0.816883	0.811087	0.888176	0.879799	0.865134	0.854882	0.915013	0.900604	0.918226	0.866091	0.884802	0.838928	0.879883	0.815532	0.877967	0.857651	0.829893	0.901203	0.916093	0.872451	0.767716	0.749114	0.77059	0.793461	0.786266	0.737976	0.577079	0.73371	0.74807
-3300	0.871067	0.88702	0.879446	0.863849	0.758633	0.815057	0.804905	0.79153	0.755658	0.854945	0.80929	0.808914	0.886622	0.879895	0.86443	0.850166	0.918385	0.894318	0.921164	0.868216	0.886343	0.835883	0.881674	0.817055	0.877259	0.850799	0.826899	0.90328	0.916536	0.866872	0.766659	0.739641	0.763452	0.791945	0.778947	0.726932	0.559655	0.729342	0.745191
-3200	0.875384	0.885931	0.881546	0.864844	0.755293	0.814994	0.806229	0.786228	0.744129	0.854856	0.817586	0.820599	0.889642	0.881769	0.866664	0.8526	0.920299	0.899537	0.921965	0.873923	0.889814	0.834537	0.883589	0.814653	0.872898	0.851531	0.836077	0.905677	0.918742	0.867947	0.769339	0.745736	0.768295	0.790601	0.788354	0.726232	0.560905	0.73076	0.741858
-3100	0.873463	0.888443	0.882423	0.868573	0.75689	0.818493	0.810094	0.783033	0.720962	0.852817	0.799114	0.826797	0.893077	0.883116	0.865247	0.858214	0.921891	0.9104	0.922415	0.873955	0.891876	0.838362	0.888637	0.82006	0.871313	0.85704	0.841444	0.908929	0.924727	0.875517	0.777109	0.748365	0.773902	0.796283	0.799339	0.734101	0.573323	0.733932	0.750328
-3000	0.877819	0.894816	0.885857	0.870191	0.770443	0.816951	0.815209	0.783389	0.737968	0.850812	0.806772	0.82871	0.897667	0.884962	0.866677	0.861071	0.926401	0.917076	0.926525	0.874026	0.896029	0.846129	0.891165	0.831905	0.875237	0.865821	0.844526	0.908295	0.927889	0.879299	0.786223	0.751392	0.776355	0.803245	0.797989	0.744945	0.587696	0.743434	0.76231
-2900	0.883501	0.896853	0.881905	0.872507	0.776146	0.820792	0.818195	0.785811	0.740571	0.852092	0.822214	0.828327	0.899991	0.884206	0.870301	0.862368	0.928226	0.920758	0.930418	0.873585	0.898631	0.849049	0.891729	0.832504	0.874722	0.876669	0.847949	0.911608	0.928999	0.883054	0.789697	0.764753	0.781931	0.80674	0.801009	0.757164	0.593287	0.750025	0.765378
-2800	0.882026	0.89803	0.883367	0.873388	0.77929	0.82712	0.819825	0.793818	0.745713	0.856347	0.831976	0.82721	0.894237	0.885227	0.871576	0.866993	0.928888	0.92183	0.931835	0.876019	0.899367	0.850899	0.890925	0.836467	0.87708	0.872237	0.848609	0.914481	0.925389	0.883026	0.78356	0.768462	0.782245	0.811237	0.801543	0.768221	0.591602	0.748939	0.764762
-2700	0.893218	0.894401	0.888391	0.875522	0.779465	0.826593	0.820453	0.7971	0.76915	0.860999	0.834242	0.823737	0.895099	0.890179	0.871755	0.87117	0.92922	0.922865	0.931755	0.880597	0.900878	0.853922	0.891023	0.83541	0.880463	0.8731	0.845156	0.915284	0.925313	0.882731	0.787871	0.758919	0.785763	0.814447	0.799332	0.765907	0.606262	0.748389	0.773842
-2600	0.894405	0.896334	0.895589	0.877212	0.785178	0.825357	0.820683	0.798508	0.760995	0.867034	0.820362	0.834547	0.898329	0.895661	0.879318	0.870419	0.927472	0.920367	0.932888	0.884503	0.898799	0.851839	0.891719	0.834742	0.885041	0.876865	0.847685	0.915369	0.925833	0.885405	0.79188	0.761475	0.792965	0.816534	0.805811	0.763494	0.603037	0.747509	0.781119
-2500	0.886996	0.895468	0.895262	0.873175	0.783457	0.827524	0.815779	0.794507	0.764615	0.866295	0.822334	0.827335	0.89827	0.890982	0.87894	0.871229	0.92466	0.917842	0.932193	0.878478	0.892639	0.84642	0.890911	0.833851	0.884771	0.871728	0.845908	0.911046	0.92099	0.880599	0.791079	0.764336	0.781408	0.813486	0.80022	0.760597	0.589959	0.744205	0.777554
-2400	0.884	0.89581	0.891098	0.872514	0.7802	0.827154	0.818482	0.793795	0.756158	0.859954	0.810274	0.822438	0.903098	0.892425	0.879988	0.872794	0.923764	0.918104	0.929682	0.874923	0.89148	0.848274	0.888332	0.829725	0.880185	0.876333	0.849237	0.910078	0.919057	0.878756	0.793007	0.763815	0.780228	0.809613	0.794943	0.757964	0.590437	0.74631	0.77192
-2300	0.883188	0.894354	0.890199	0.872098	0.782535	0.830495	0.82003	0.790349	0.753373	0.852346	0.827307	0.822597	0.901892	0.889856	0.877615	0.873733	0.921837	0.91874	0.927296	0.880698	0.891651	0.84856	0.88682	0.828528	0.878147	0.876431	0.85146	0.911753	0.923024	0.875948	0.789057	0.770587	0.784593	0.807596	0.797275	0.762598	0.59486	0.745374	0.766233
-2200	0.875207	0.893859	0.887039	0.871756	0.784606	0.829835	0.819076	0.786382	0.743769	0.848461	0.811337	0.827654	0.90129	0.89209	0.874978	0.874199	0.919853	0.91819	0.92606	0.88155	0.892714	0.847473	0.883888	0.830246	0.876621	0.873377	0.852282	0.913075	0.92574	0.878591	0.789523	0.772334	0.781062	0.798948	0.80376	0.769022	0.594618	0.739037	0.766149
-2100	0.879272	0.890129	0.882375	0.868454	0.774808	0.822652	0.814692	0.780856	0.749095	0.847232	0.820922	0.818251	0.895916	0.887522	0.870957	0.866628	0.91509	0.915376	0.924977	0.873821	0.893264	0.840769	0.882633	0.821073	0.873571	0.866855	0.846083	0.910673	0.920141	0.870121	0.774641	0.752807	0.771615	0.792044	0.795404	0.75601	0.586298	0.730021	0.759559
-2000	0.870811	0.886901	0.8829	0.865205	0.768374	0.820086	0.808212	0.778284	0.731866	0.852838	0.81141	0.815407	0.894918	0.885775	0.87019	0.860042	0.914686	0.912458	0.92153	0.869929	0.8899	0.831601	0.88259	0.820662	0.87469	0.866476	0.840382	0.907595	0.91535	0.864428	0.765304	0.744813	0.766186	0.790139	0.788567	0.740095	0.577946	0.724852	0.748392
-1900	0.863558	0.881562	0.875903	0.860401	0.757064	0.814124	0.796716	0.770953	0.734321	0.851327	0.796647	0.813969	0.883452	0.876225	0.865691	0.854287	0.913215	0.908592	0.915869	0.861644	0.885999	0.830983	0.878267	0.816418	0.871335	0.853636	0.827036	0.903395	0.913099	0.860442	0.755867	0.736908	0.757628	0.778854	0.776112	0.731454	0.561277	0.716539	0.741121
-1800	0.859496	0.880755	0.875896	0.855253	0.754339	0.810142	0.794301	0.767748	0.724965	0.852309	0.808928	0.808035	0.883138	0.878413	0.863505	0.853693	0.910385	0.904678	0.915586	0.858533	0.881862	0.829327	0.877125	0.810843	0.870174	0.854076	0.821051	0.902465	0.914392	0.858679	0.764388	0.738547	0.763476	0.781904	0.782886	0.733256	0.5597	0.718634	0.743867
-1700	0.858351	0.876704	0.872321	0.85322	0.761822	0.81472	0.795107	0.771058	0.712381	0.8484	0.79663	0.806126	0.881967	0.874656	0.859799	0.854291	0.906782	0.901006	0.912118	0.849063	0.876948	0.817893	0.876654	0.806447	0.866197	0.858291	0.823685	0.90065	0.915535	0.861292	0.772313	0.735914	0.759742	0.78315	0.772609	0.729226	0.561429	0.717966	0.741562
-1600	0.867869	0.874379	0.862982	0.849213	0.760515	0.818996	0.794766	0.771674	0.743899	0.847132	0.812507	0.802159	0.884222	0.869645	0.855099	0.854773	0.905953	0.898348	0.910472	0.849701	0.875791	0.820724	0.875359	0.804087	0.862436	0.85183	0.821729	0.900919	0.914936	0.865004	0.766155	0.750766	0.760356	0.784036	0.77277	0.726875	0.571378	0.717146	0.742762
-1500	0.846884	0.870798	0.859462	0.846766	0.751499	0.810634	0.79374	0.776921	0.727369	0.84539	0.81265	0.80446	0.880016	0.869453	0.856609	0.849184	0.905414	0.892776	0.908824	0.85604	0.875195	0.828339	0.878364	0.80963	0.861092	0.840986	0.819965	0.89849	0.90789	0.861903	0.762485	0.747106	0.759279	0.780265	0.774929	0.729095	0.572897	0.722011	0.743924
-1400	0.849389	0.869245	0.862799	0.847205	0.744025	0.805503	0.793118	0.782113	0.741475	0.844291	0.815718	0.800298	0.875684	0.867457	0.85371	0.850849	0.907593	0.894322	0.910107	0.856325	0.874659	0.834476	0.877403	0.815781	0.861679	0.837413	0.821737	0.900858	0.903125	0.862623	0.761866	0.740103	0.762475	0.779329	0.772471	0.738377	0.576233	0.726783	0.744579
-1300	0.86385	0.872869	0.869664	0.85357	0.750395	0.809054	0.795388	0.782094	0.746704	0.847337	0.810803	0.808329	0.878642	0.867609	0.852991	0.860014	0.908913	0.903187	0.913914	0.85886	0.875889	0.83463	0.880945	0.819431	0.866774	0.854842	0.825022	0.901609	0.907655	0.865641	0.766265	0.740315	0.76232	0.784337	0.775244	0.741808	0.579115	0.734481	0.749629
-1200	0.865562	0.879504	0.876877	0.857292	0.758471	0.81619	0.807728	0.791726	0.742343	0.852246	0.810026	0.819592	0.88055	0.873924	0.860578	0.862932	0.90604	0.910277	0.916574	0.871013	0.881181	0.846111	0.881141	0.823746	0.875468	0.863518	0.830384	0.903427	0.907756	0.870621	0.776938	0.751146	0.772946	0.791149	0.792695	0.751272	0.582328	0.73222	0.75853
-1100	0.871539	0.888816	0.88167	0.87272	0.7725	0.826952	0.814812	0.803946	0.752242	0.852408	0.797236	0.829517	0.884293	0.885453	0.869846	0.867321	0.908237	0.915226	0.920201	0.882203	0.885898	0.855867	0.88726	0.839625	0.878111	0.863747	0.842847	0.908729	0.915019	0.881852	0.79237	0.776345	0.79015	0.805803	0.807102	0.769592	0.596155	0.735916	0.758304
-1000	0.881433	0.89263	0.888411	0.875575	0.789749	0.829457	0.821994	0.804693	0.761427	0.854518	0.813603	0.838417	0.885115	0.889966	0.874375	0.870506	0.913246	0.914525	0.921388	0.885329	0.893698	0.856842	0.889554	0.848907	0.880987	0.865575	0.851231	0.910826	0.916398	0.886897	0.805917	0.799563	0.799666	0.812194	0.818629	0.76972	0.601471	0.746705	0.764817
-900	0.876183	0.891183	0.889881	0.870267	0.790628	0.833853	0.826192	0.800004	0.772206	0.855849	0.824831	0.836661	0.888202	0.889602	0.877713	0.86416	0.915113	0.903531	0.921799	0.882135	0.892613	0.853184	0.885231	0.849086	0.881839	0.870605	0.85393	0.907455	0.918645	0.883111	0.802347	0.798765	0.805396	0.818045	0.816114	0.78232	0.6058	0.751844	0.775012
-800	0.881085	0.890136	0.888076	0.868596	0.788894	0.833153	0.824076	0.792021	0.776616	0.856857	0.832202	0.828644	0.891976	0.887973	0.874858	0.860015	0.913978	0.906139	0.918487	0.879004	0.887914	0.84781	0.876969	0.833908	0.882336	0.871269	0.85236	0.904581	0.919783	0.881804	0.800158	0.782855	0.792642	0.826642	0.807892	0.78106	0.604125	0.748727	0.767919
-700	0.866689	0.88208	0.882321	0.866007	0.782651	0.829166	0.823263	0.784991	0.753011	0.853556	0.809708	0.822823	0.887592	0.882554	0.869492	0.854089	0.9133	0.903686	0.916722	0.866833	0.885267	0.841522	0.873706	0.813586	0.877862	0.863295	0.845497	0.900929	0.915342	0.870306	0.798137	0.768861	0.782218	0.818014	0.803163	0.772848	0.586081	0.74069	0.756006
-600	0.855992	0.876184	0.870115	0.857907	0.769882	0.818589	0.815738	0.782408	0.732965	0.846715	0.798019	0.81068	0.881347	0.875221	0.862506	0.844177	0.911922	0.898587	0.913588	0.86126	0.878703	0.831684	0.870488	0.807467	0.870209	0.856278	0.835689	0.891701	0.909385	0.857172	0.793443	0.750689	0.778711	0.801695	0.795315	0.761568	0.573879	0.727907	0.74468
-500	0.828908	0.868731	0.860581	0.847723	0.768007	0.811341	0.801832	0.783181	0.718318	0.841039	0.796433	0.803247	0.868106	0.864993	0.854158	0.81759	0.905471	0.88699	0.911976	0.857777	0.8678	0.828099	0.869102	0.810164	0.865357	0.841591	0.819212	0.874191	0.897375	0.847179	0.77868	0.753374	0.765749	0.785999	0.783507	0.749579	0.573531	0.721096	0.734419
-400	0.804645	0.854341	0.838812	0.834386	0.749242	0.797152	0.777179	0.765927	0.724004	0.83209	0.794269	0.792484	0.841909	0.846043	0.832643	0.782127	0.897399	0.869445	0.896627	0.840448	0.846484	0.810963	0.849297	0.790504	0.846976	0.818723	0.791737	0.851652	0.887518	0.84353	0.752309	0.74282	0.74819	0.763259	0.758029	0.729989	0.549605	0.697942	0.70407
-300	0.768446	0.841072	0.820976	0.8186	0.730118	0.774817	0.756502	0.754905	0.71194	0.826699	0.778827	0.790535	0.816286	0.825773	0.799907	0.758791	0.886178	0.842033	0.886473	0.805477	0.813147	0.772857	0.821398	0.752969	0.838795	0.796431	0.767141	0.832282	0.877817	0.835668	0.720262	0.709759	0.739029	0.742203	0.710303	0.706584	0.530724	0.670714	0.673375
-200	0.838047	0.843082	0.811777	0.816611	0.710089	0.758568	0.744354	0.748764	0.702502	0.829806	0.765935	0.784799	0.82076	0.805402	0.770957	0.746887	0.87669	0.828105	0.885572	0.746396	0.782917	0.713597	0.791296	0.691103	0.841134	0.792245	0.755897	0.824073	0.87823	0.834247	0.685409	0.676799	0.709896	0.704691	0.617309	0.674189	0.516213	0.65576	0.649812
-100	0.87977	0.850181	0.821416	0.831	0.721339	0.772818	0.754154	0.759076	0.733302	0.833175	0.752784	0.799449	0.839152	0.814351	0.78575	0.772974	0.885125	0.843532	0.888284	0.746601	0.793376	0.712513	0.793296	0.688533	0.844947	0.801201	0.773018	0.84156	0.883399	0.84425	0.702777	0.692408	0.716264	0.711387	0.631257	0.682682	0.509926	0.663782	0.65906
0	0.824727	0.861127	0.851954	0.838242	0.735917	0.778487	0.772419	0.775422	0.71467	0.839606	0.770974	0.802405	0.871099	0.862074	0.848052	0.848242	0.897461	0.871859	0.893272	0.828105	0.855528	0.80111	0.851098	0.775478	0.852653	0.822573	0.795723	0.8841	0.899738	0.86888	0.767271	0.7474	0.779523	0.778296	0.745233	0.745193	0.562165	0.707385	0.720676
100	0.796241	0.875732	0.866935	0.848362	0.774076	0.799155	0.795557	0.797422	0.722248	0.851141	0.792504	0.800699	0.893221	0.889356	0.882736	0.893954	0.89537	0.885633	0.901119	0.886234	0.904282	0.876601	0.897702	0.859955	0.864076	0.845383	0.820626	0.909675	0.906781	0.874435	0.821444	0.800308	0.828359	0.840568	0.846645	0.804647	0.617694	0.728036	0.759666
200	0.807993	0.883549	0.866882	0.858631	0.778247	0.811091	0.800785	0.80405	0.724184	0.855684	0.735788	0.81428	0.90544	0.904422	0.897528	0.905911	0.890201	0.896971	0.908965	0.892524	0.904698	0.883418	0.906915	0.863672	0.869166	0.847466	0.830486	0.924115	0.913879	0.871015	0.839687	0.805278	0.824716	0.845326	0.849156	0.811741	0.601796	0.714974	0.751498
300	0.833218	0.878698	0.856101	0.851055	0.755908	0.805294	0.797596	0.800756	0.698343	0.855596	0.723645	0.813199	0.909771	0.900321	0.891905	0.899197	0.883879	0.891989	0.9081	0.862841	0.887853	0.852758	0.891256	0.828867	0.865975	0.841373	0.818345	0.924166	0.917599	0.865445	0.815517	0.767149	0.791731	0.817558	0.796217	0.766768	0.56844	0.688733	0.723898
400	0.841356	0.857478	0.841497	0.832533	0.72653	0.782281	0.78127	0.785875	0.71101	0.854257	0.740715	0.801881	0.900829	0.88236	0.875914	0.878558	0.873842	0.869637	0.893721	0.830938	0.863524	0.81498	0.867113	0.792808	0.850257	0.823035	0.787891	0.914181	0.910618	0.85234	0.777242	0.716226	0.759247	0.777487	0.752882	0.723318	0.541329	0.668004	0.691418
500	0.826016	0.8324	0.821258	0.819056	0.697162	0.755297	0.760538	0.769609	0.717354	0.845056	0.765302	0.796392	0.87937	0.863946	0.857302	0.854387	0.864185	0.857404	0.874742	0.820362	0.848667	0.80433	0.849812	0.782107	0.828196	0.801516	0.760977	0.903975	0.899354	0.84623	0.745519	0.695108	0.738535	0.743527	0.73028	0.68948	0.511815	0.64304	0.663521
600	0.801683	0.823011	0.813694	0.818105	0.686083	0.754034	0.75613	0.765404	0.702951	0.841679	0.777285	0.800241	0.871709	0.858191	0.854194	0.834052	0.858012	0.838713	0.864165	0.822165	0.841682	0.807317	0.849486	0.795166	0.820935	0.783434	0.752241	0.895992	0.890045	0.836796	0.730568	0.692398	0.730746	0.731937	0.730904	0.678009	0.513103	0.638899	0.655986
700	0.794995	0.814206	0.803708	0.810805	0.690045	0.750488	0.752265	0.763985	0.693122	0.834905	0.774136	0.799341	0.864115	0.854163	0.850944	0.821707	0.854207	0.82335	0.861624	0.818653	0.833747	0.80883	0.848469	0.796158	0.816822	0.773439	0.750146	0.887424	0.890689	0.837412	0.721309	0.696284	0.733866	0.725982	0.730859	0.671687	0.52074	0.640008	0.655839
800	0.779526	0.812409	0.795569	0.806684	0.690813	0.745821	0.749379	0.760653	0.696533	0.837469	0.772442	0.797554	0.856809	0.851997	0.845577	0.815751	0.855403	0.819781	0.861519	0.817348	0.832235	0.808221	0.846716	0.788067	0.813366	0.772524	0.75015	0.883466	0.892146	0.846742	0.71548	0.692925	0.726729	0.730848	0.727918	0.669703	0.527087	0.644357	0.657803
900	0.780423	0.811446	0.79444	0.800013	0.683801	0.744192	0.747067	0.757322	0.711432	0.84081	0.789804	0.794817	0.856215	0.846768	0.840671	0.805411	0.849672	0.810752	0.854391	0.807849	0.83145	0.80286	0.837503	0.776965	0.814517	0.773162	0.744951	0.877099	0.88201	0.838696	0.712615	0.681949	0.71602	0.722092	0.717899	0.665072	0.527868	0.648662	0.660435
1000	0.788541	0.811275	0.796302	0.806174	0.686401	0.753717	0.750548	0.758099	0.723814	0.838728	0.796631	0.801538	0.857937	0.852859	0.843657	0.802231	0.852737	0.811817	0.849937	0.80653	0.835558	0.799431	0.839774	0.775445	0.813439	0.769382	0.746528	0.878406	0.882579	0.83765	0.719532	0.681947	0.717227	0.733661	0.725754	0.667044	0.539877	0.65748	0.662536
1100	0.787984	0.809798	0.796294	0.805097	0.686765	0.747709	0.748616	0.759216	0.71274	0.839577	0.784407	0.807847	0.857697	0.856136	0.840412	0.800507	0.854677	0.819054	0.850253	0.809865	0.826511	0.803359	0.839445	0.777069	0.807331	0.768682	0.74657	0.879061	0.88518	0.838683	0.722735	0.688549	0.723454	0.734753	0.733063	0.667416	0.545667	0.66408	0.668024
1200	0.780274	0.80825	0.793705	0.798311	0.685853	0.743032	0.746393	0.759708	0.709493	0.838698	0.779997	0.801525	0.858033	0.854948	0.838841	0.79802	0.859896	0.817744	0.851352	0.806767	0.82224	0.805126	0.836921	0.779818	0.810405	0.768067	0.748559	0.876425	0.885876	0.839426	0.716643	0.692077	0.714422	0.740506	0.729198	0.672127	0.544225	0.664835	0.677368
1300	0.798257	0.806497	0.792915	0.79247	0.681042	0.743221	0.741574	0.76118	0.731947	0.837058	0.80249	0.797542	0.853889	0.853166	0.837557	0.795555	0.859029	0.81181	0.850882	0.812921	0.825573	0.806423	0.840027	0.78674	0.808687	0.760571	0.747561	0.876317	0.890338	0.842421	0.70543	0.684708	0.705843	0.738679	0.729657	0.668902	0.54465	0.671657	0.686771
1400	0.804324	0.80448	0.790757	0.799391	0.677179	0.747459	0.74245	0.759419	0.722997	0.836039	0.791056	0.799458	0.855051	0.854656	0.840716	0.799649	0.857112	0.814147	0.848697	0.812646	0.825212	0.805277	0.837409	0.78804	0.804476	0.764531	0.747925	0.876627	0.885352	0.845603	0.697331	0.685347	0.708811	0.734225	0.731064	0.667696	0.54736	0.675411	0.691248
1500	0.793091	0.803247	0.790458	0.805484	0.69226	0.745269	0.748315	0.750354	0.713951	0.832434	0.765805	0.80281	0.860112	0.856528	0.840886	0.803074	0.852905	0.819353	0.849506	0.807072	0.821435	0.799237	0.831743	0.777083	0.796819	0.772374	0.747004	0.875703	0.883949	0.843647	0.712416	0.695366	0.72071	0.740768	0.729922	0.678185	0.552337	0.682181	0.692967
1600	0.795914	0.804278	0.796415	0.806867	0.697041	0.751378	0.751638	0.753404	0.702761	0.82912	0.772302	0.808337	0.864862	0.862973	0.844299	0.806645	0.849641	0.823154	0.851089	0.807879	0.818854	0.798861	0.831801	0.770669	0.794522	0.790705	0.753157	0.874848	0.892002	0.848454	0.7257	0.706079	0.723997	0.756817	0.742691	0.692947	0.552876	0.690765	0.703889
1700	0.782547	0.804346	0.794162	0.807064	0.69204	0.746962	0.746543	0.752468	0.681613	0.826889	0.780814	0.798743	0.861662	0.856853	0.842563	0.801616	0.843919	0.822912	0.852489	0.801963	0.82041	0.798704	0.830267	0.764804	0.794091	0.793553	0.752634	0.87323	0.890248	0.846675	0.71709	0.6985	0.72055	0.746492	0.730567	0.694945	0.548423	0.688599	0.709401
1800	0.782412	0.805037	0.791318	0.800104	0.682238	0.736776	0.741786	0.752316	0.708359	0.826342	0.783069	0.791394	0.85056	0.849294	0.837902	0.794523	0.835621	0.810296	0.848136	0.796455	0.81952	0.795572	0.834029	0.764806	0.796076	0.771339	0.74748	0.871399	0.880092	0.837197	0.71065	0.690166	0.709296	0.730526	0.713618	0.67946	0.542463	0.687425	0.703502
1900	0.772414	0.793432	0.784507	0.790596	0.677181	0.728968	0.733054	0.746274	0.687672	0.82093	0.779131	0.787067	0.845462	0.844611	0.830118	0.788043	0.831376	0.802809	0.84321	0.784624	0.81562	0.792234	0.831309	0.766675	0.78988	0.759623	0.733897	0.865637	0.872369	0.828787	0.702623	0.674857	0.692446	0.714884	0.707302	0.664735	0.530117	0.672623	0.691854
2000	0.766447	0.783474	0.775285	0.784237	0.672083	0.724062	0.731702	0.734153	0.680109	0.812881	0.760557	0.778954	0.849749	0.838825	0.829981	0.779882	0.832188	0.797632	0.833473	0.781084	0.80573	0.777552	0.820162	0.752175	0.784092	0.766856	0.727989	0.861129	0.876102	0.827494	0.695363	0.668115	0.693535	0.700449	0.709009	0.659136	0.515958	0.657942	0.687799
2100	0.757019	0.781551	0.776753	0.782607	0.665678	0.728762	0.729365	0.731563	0.676547	0.808137	0.765202	0.778918	0.854288	0.841487	0.838145	0.781726	0.835314	0.796759	0.830217	0.77931	0.803315	0.772724	0.813041	0.740814	0.776508	0.76977	0.726827	0.861253	0.88112	0.824822	0.700426	0.675676	0.698969	0.70585	0.705495	0.653913	0.511911	0.660097	0.692125
2200	0.753337	0.783585	0.784141	0.783562	0.673833	0.737932	0.733206	0.733508	0.669043	0.808317	0.749771	0.787675	0.858022	0.841207	0.840007	0.782897	0.832709	0.793862	0.83233	0.784142	0.809889	0.77415	0.81559	0.742272	0.777461	0.77362	0.728563	0.861743	0.880551	0.817845	0.706816	0.67597	0.697255	0.713962	0.718062	0.657528	0.532914	0.669248	0.703142
2300	0.757549	0.784233	0.780624	0.778255	0.672605	0.731539	0.734418	0.731307	0.670041	0.809278	0.751764	0.777392	0.854322	0.837835	0.831508	0.784135	0.830228	0.792223	0.832642	0.790542	0.809541	0.778313	0.816604	0.748307	0.777577	0.771635	0.728465	0.860999	0.87259	0.812317	0.698761	0.659513	0.689526	0.711464	0.710777	0.651765	0.528217	0.673188	0.703634
2400	0.747995	0.774011	0.772723	0.769267	0.6614	0.721556	0.73084	0.724927	0.666633	0.808511	0.752323	0.765692	0.838905	0.832051	0.825182	0.783377	0.828331	0.782006	0.828574	0.78518	0.805509	0.773751	0.811695	0.745021	0.773632	0.755537	0.721617	0.859574	0.873608	0.807759	0.683033	0.652712	0.681713	0.705197	0.698839	0.644337	0.514861	0.670754	0.70228
2500	0.753442	0.765619	0.766219	0.76487	0.648121	0.713491	0.728083	0.716424	0.659181	0.808894	0.755583	0.760042	0.832121	0.826099	0.820925	0.779816	0.830555	0.774928	0.82429	0.772347	0.796399	0.758811	0.801991	0.729222	0.770559	0.742204	0.714156	0.857205	0.872096	0.803903	0.673759	0.642931	0.677604	0.699975	0.685781	0.638303	0.507482	0.663881	0.696519
2600	0.764039	0.772512	0.769538	0.772097	0.658026	0.720349	0.72974	0.722405	0.671703	0.811038	0.761483	0.770321	0.840765	0.829748	0.823801	0.785451	0.832765	0.784138	0.823725	0.776925	0.802834	0.7642	0.805488	0.734661	0.76908	0.747475	0.717768	0.858	0.875971	0.814645	0.681078	0.656208	0.682932	0.712391	0.693704	0.639296	0.519	0.672674	0.696144
2700	0.765312	0.789518	0.776813	0.784498	0.677668	0.728069	0.738191	0.731638	0.68427	0.817501	0.765514	0.780031	0.850666	0.838473	0.829742	0.791956	0.838293	0.79407	0.831637	0.78528	0.813449	0.783157	0.816513	0.757483	0.773062	0.75681	0.728386	0.859827	0.870632	0.818052	0.694357	0.681588	0.696211	0.720894	0.712618	0.660483	0.540047	0.687249	0.702354
2800	0.744546	0.793946	0.783856	0.789656	0.683062	0.735633	0.742049	0.74165	0.674396	0.81871	0.745398	0.779317	0.851468	0.845552	0.830776	0.787729	0.833857	0.798027	0.83774	0.791149	0.821584	0.791407	0.823196	0.763745	0.777989	0.760032	0.739791	0.86156	0.871922	0.819321	0.703585	0.684957	0.698529	0.721647	0.723254	0.668635	0.542404	0.691929	0.706264
2900	0.750808	0.787079	0.776619	0.789415	0.678086	0.734436	0.735161	0.729152	0.674059	0.815046	0.740395	0.77469	0.846409	0.838784	0.826532	0.783518	0.825063	0.794125	0.833629	0.779885	0.808941	0.781669	0.813814	0.749276	0.770601	0.758065	0.737901	0.861295	0.872818	0.818705	0.698083	0.672895	0.695644	0.72235	0.70743	0.657083	0.537379	0.680762	0.701908
3000	0.74827	0.777737	0.769723	0.779423	0.674504	0.722205	0.729681	0.725042	0.671692	0.809452	0.743966	0.779551	0.839227	0.835856	0.825684	0.779203	0.82692	0.788141	0.829119	0.773725	0.805405	0.772078	0.810525	0.741502	0.76892	0.760934	0.728005	0.858053	0.864526	0.812841	0.689766	0.65806	0.6813	0.71195	0.689285	0.651204	0.533472	0.668153	0.689273
3100	0.754451	0.770411	0.763136	0.776667	0.674494	0.723316	0.727218	0.72755	0.670243	0.805068	0.731311	0.780984	0.835896	0.831397	0.823184	0.777113	0.824016	0.788651	0.824601	0.769627	0.798778	0.763784	0.801154	0.74183	0.763804	0.754547	0.722316	0.854935	0.862503	0.816699	0.695623	0.662277	0.684747	0.709665	0.702691	0.65512	0.533357	0.662499	0.686565
3200	0.752897	0.773206	0.766469	0.782857	0.676162	0.733108	0.733041	0.724316	0.675675	0.806159	0.745169	0.784947	0.83924	0.831042	0.820311	0.776306	0.819499	0.781665	0.822045	0.7751	0.790548	0.762352	0.801349	0.743015	0.762267	0.747075	0.723275	0.852067	0.865449	0.823562	0.694588	0.671531	0.693484	0.702019	0.714051	0.65747	0.53793	0.671257	0.693171
3300	0.744665	0.77664	0.767312	0.776839	0.668099	0.718628	0.731564	0.725328	0.68776	0.802506	0.761627	0.767186	0.834263	0.823772	0.816065	0.772864	0.815797	0.775612	0.821163	0.769674	0.78731	0.766046	0.802925	0.739252	0.75816	0.743285	0.71907	0.849623	0.865169	0.816766	0.681325	0.667649	0.693711	0.696259	0.696381	0.652612	0.532184	0.671152	0.692944
3400	0.753343	0.77136	0.763318	0.768713	0.670391	0.719551	0.731445	0.728332	0.691867	0.800967	0.763938	0.762204	0.84116	0.828765	0.816852	0.772998	0.814925	0.767478	0.82088	0.764762	0.78723	0.760902	0.798154	0.733078	0.755305	0.761045	0.724223	0.846948	0.859326	0.812748	0.687349	0.672754	0.691272	0.708517	0.695426	0.654174	0.53762	0.675217	0.69975
3500	0.747215	0.765388	0.761211	0.768115	0.679396	0.735512	0.732838	0.721696	0.67432	0.796233	0.746015	0.771388	0.843911	0.830543	0.812376	0.777787	0.812586	0.770161	0.818698	0.75271	0.782562	0.753372	0.78664	0.724257	0.749065	0.773996	0.722781	0.846416	0.862306	0.804961	0.705522	0.671159	0.695114	0.713724	0.706481	0.656578	0.546976	0.6738	0.704132
3600	0.736649	0.763053	0.766469	0.766823	0.689167	0.743208	0.731909	0.718934	0.666451	0.79361	0.727078	0.774109	0.844678	0.832063	0.816847	0.786374	0.813525	0.78441	0.816165	0.750547	0.780002	0.747648	0.783885	0.72007	0.749504	0.774148	0.728491	0.849702	0.859718	0.803881	0.712726	0.671848	0.690149	0.711415	0.70541	0.661114	0.552943	0.676382	0.709414
3700	0.730427	0.760712	0.762172	0.759033	0.690164	0.74262	0.733467	0.717256	0.649668	0.791059	0.72224	0.770224	0.846504	0.831119	0.821545	0.786926	0.815848	0.785315	0.812401	0.748318	0.775392	0.734008	0.775356	0.714162	0.751891	0.772322	0.730763	0.849185	0.864697	0.801962	0.71174	0.671315	0.683677	0.716527	0.698395	0.669141	0.567013	0.68034	0.711323
3800	0.745417	0.75846	0.756703	0.758831	0.683826	0.73217	0.733504	0.7137	0.665604	0.789751	0.728842	0.763801	0.840097	0.825954	0.824811	0.777996	0.813547	0.781035	0.806182	0.75289	0.773758	0.73533	0.775603	0.721078	0.751277	0.76726	0.72828	0.847876	0.867595	0.800714	0.711464	0.669895	0.681081	0.716148	0.690509	0.659447	0.564702	0.675456	0.700007
3900	0.731502	0.756432	0.755189	0.757172	0.675988	0.725545	0.727535	0.717549	0.663453	0.787584	0.742479	0.760897	0.82879	0.82198	0.820144	0.770102	0.813066	0.778168	0.804301	0.76886	0.771698	0.749463	0.780749	0.730979	0.750136	0.753425	0.71567	0.842596	0.86503	0.800772	0.700549	0.66961	0.690939	0.712388	0.697703	0.660136	0.554262	0.669457	0.692417
4000	0.742391	0.756768	0.754768	0.757056	0.668689	0.723171	0.721849	0.728329	0.669916	0.794047	0.760968	0.763645	0.829204	0.820401	0.815364	0.764461	0.809961	0.774398	0.80802	0.776845	0.780842	0.756994	0.789167	0.737591	0.757416	0.750326	0.70685	0.835737	0.859072	0.805194	0.679939	0.661312	0.683869	0.706819	0.698361	0.655598	0.547301	0.662731	0.689125
4100	0.73093	0.757053	0.75482	0.75803	0.659661	0.722529	0.720029	0.730373	0.67332	0.796758	0.744248	0.772722	0.833668	0.823389	0.814094	0.762439	0.806171	0.767998	0.807177	0.77281	0.781499	0.759735	0.792677	0.734904	0.761263	0.748678	0.703733	0.837829	0.853318	0.803225	0.671157	0.655386	0.679295	0.697513	0.692132	0.643405	0.531873	0.65607	0.682038
4200	0.743878	0.756905	0.754546	0.760462	0.66367	0.719607	0.719955	0.731363	0.688388	0.797901	0.757409	0.776357	0.839152	0.822526	0.817242	0.762888	0.811043	0.761042	0.810716	0.761727	0.777717	0.757015	0.788959	0.731287	0.765187	0.745399	0.704415	0.836744	0.852081	0.803411	0.673703	0.64799	0.684261	0.700521	0.694435	0.64455	0.525328	0.662331	0.683993
4300	0.730868	0.757345	0.7551	0.75713	0.666339	0.716408	0.71985	0.731719	0.678429	0.795395	0.758649	0.771892	0.83778	0.821348	0.814818	0.760978	0.805496	0.754808	0.810158	0.755793	0.778089	0.751483	0.789651	0.731001	0.762685	0.740028	0.708658	0.832968	0.846606	0.802897	0.675273	0.645135	0.681122	0.697497	0.698594	0.638175	0.52878	0.666083	0.687893
4400	0.728262	0.758949	0.757381	0.755727	0.662459	0.712236	0.720438	0.727495	0.681242	0.794122	0.751707	0.761	0.834409	0.822833	0.815116	0.757532	0.802563	0.756743	0.812073	0.769611	0.778698	0.755531	0.793671	0.740135	0.758714	0.740698	0.708241	0.831734	0.849286	0.802443	0.679599	0.650271	0.688649	0.692588	0.700619	0.639466	0.534047	0.663861	0.689272
4500	0.737574	0.761959	0.760507	0.765244	0.669803	0.71915	0.726112	0.722762	0.670533	0.788641	0.731856	0.771775	0.830991	0.825171	0.81868	0.768575	0.802225	0.772319	0.807498	0.77322	0.784533	0.759886	0.792765	0.744712	0.756057	0.74772	0.709956	0.83529	0.858063	0.812383	0.690295	0.671682	0.6887	0.70554	0.703906	0.653621	0.54478	0.668276	0.691167
4600	0.751338	0.768584	0.76123	0.770631	0.683314	0.719803	0.728615	0.721249	0.681287	0.790444	0.751126	0.776924	0.831276	0.825669	0.814619	0.778112	0.802345	0.783561	0.811358	0.770123	0.783718	0.761002	0.784134	0.740934	0.753149	0.757308	0.7161	0.836519	0.859552	0.818958	0.696287	0.683548	0.694086	0.710292	0.715173	0.661129	0.546878	0.667959	0.689684
4700	0.755965	0.764867	0.756891	0.770026	0.681651	0.715828	0.72879	0.724073	0.695194	0.791933	0.753928	0.773062	0.831762	0.822632	0.81092	0.776592	0.800827	0.786246	0.807317	0.769904	0.77636	0.756808	0.777123	0.734782	0.749918	0.753006	0.7256	0.834506	0.851021	0.815209	0.690644	0.680546	0.697229	0.710992	0.714177	0.666495	0.549587	0.663866	0.689993
4800	0.749364	0.757204	0.754014	0.76207	0.678734	0.714006	0.726635	0.726435	0.688248	0.789733	0.758159	0.775439	0.823609	0.819195	0.815091	0.772066	0.805334	0.780823	0.801598	0.766781	0.774709	0.75664	0.776614	0.733354	0.74785	0.744853	0.722715	0.832541	0.845016	0.81501	0.689677	0.682795	0.703314	0.712785	0.707066	0.667436	0.561108	0.670508	0.696834
4900	0.738671	0.746292	0.745671	0.752983	0.669922	0.705209	0.715118	0.717142	0.6828	0.782625	0.74253	0.767104	0.812069	0.810257	0.806828	0.760567	0.801072	0.765179	0.790105	0.752589	0.773279	0.746877	0.772971	0.726607	0.741378	0.743399	0.713607	0.82734	0.831838	0.801122	0.679256	0.663114	0.694013	0.699998	0.689519	0.656282	0.551452	0.666845	0.696633

## Sheet: Forks L>R HO tDNAs
bp_from_tDNA	rrm3_AA_1	rrm3_AA_2	rrm3_AA_2.1	rpc25_rrm3_1	rpc25_rrm3_2	rpc25_rrm3_3	rpc25_rpc82_rrm3_1	rpc25_rpc82_rrm3_2	rpc25_rpc82_rrm3_3	bdp1_rrm3_1	bdp1_rrm3_2	bdp1_rrm3_3	anchor_away_1	anchor_away_2	anchor_away_3	rrm3KO_1	rrm3KO_2	rrm3KO_3	TLS_rrm3_1	TLS_rrm3_2	TLS_rrm3_3	rad18_rrm3_1	rad18_rrm3_2	rad18_rrm3_3	brn1_rrm3_1	brn1_rrm3_2	brn1_rrm3_2techrep	KO_wt_bkg_1	KO_wt_bkg_2	KO_wt_bkg_3	top1_rrm3_1	top1_rrm3_2	top1_rrm3_3	top2_rrm3_1	top2_rrm3_2	top2_rrm3_3	top1_top2_rrm3_1	top1_top2_rrm3_2	top1_top2_rrm3_3
-4900	0.834208	0.859405	0.847807	0.817353	0.710823	0.757018	0.762689	0.740197	0.708529	0.815421	0.800657	0.756664	0.858676	0.847477	0.828307	0.814779	0.87112	0.858831	0.878857	0.844503	0.850116	0.818684	0.861817	0.806651	0.855285	0.804791	0.801744	0.855739	0.869392	0.846024	0.755603	0.72421	0.755396	0.765804	0.764646	0.709461	0.577019	0.721492	0.733091
-4800	0.840471	0.861364	0.853075	0.824433	0.693213	0.753844	0.757152	0.751228	0.732838	0.822638	0.800825	0.759189	0.868108	0.837879	0.825265	0.825893	0.877483	0.864731	0.885927	0.838115	0.852853	0.820484	0.863499	0.808779	0.856616	0.814106	0.794314	0.85958	0.871249	0.84712	0.737556	0.701459	0.742188	0.764838	0.746228	0.71319	0.553182	0.719867	0.727979
-4700	0.857171	0.858496	0.853143	0.828562	0.701779	0.762597	0.756819	0.755822	0.750998	0.829526	0.783428	0.770334	0.877535	0.84449	0.83197	0.834671	0.881198	0.862524	0.890576	0.836166	0.86141	0.821693	0.849343	0.801676	0.852396	0.820139	0.795504	0.864808	0.882504	0.849069	0.744284	0.711184	0.745926	0.759912	0.747634	0.724862	0.558008	0.730808	0.738892
-4600	0.876636	0.860126	0.851843	0.825471	0.72172	0.773187	0.755373	0.758146	0.740578	0.823206	0.779282	0.777284	0.872661	0.853039	0.837757	0.844275	0.882904	0.869579	0.893348	0.841672	0.866045	0.815525	0.84873	0.799033	0.850082	0.818234	0.805899	0.875928	0.885921	0.853217	0.744641	0.731556	0.753966	0.778409	0.775512	0.731012	0.580937	0.725624	0.747468
-4500	0.851782	0.869303	0.856001	0.830254	0.735944	0.780051	0.769465	0.756983	0.72662	0.814361	0.788963	0.78621	0.873833	0.859588	0.846962	0.848676	0.884904	0.879884	0.895471	0.849528	0.866437	0.818156	0.860424	0.805793	0.848358	0.821811	0.813729	0.885572	0.897967	0.855016	0.747539	0.75196	0.773221	0.781821	0.780737	0.727785	0.599978	0.726915	0.753813
-4400	0.862867	0.870983	0.860523	0.837348	0.743588	0.791551	0.774112	0.753674	0.722834	0.812361	0.773715	0.793159	0.873651	0.860799	0.85797	0.850906	0.883534	0.884143	0.899009	0.849705	0.863035	0.820977	0.859988	0.801685	0.846845	0.83208	0.814056	0.884717	0.902532	0.858081	0.750503	0.752996	0.769845	0.770031	0.781546	0.733803	0.593658	0.730042	0.762597
-4300	0.860878	0.869254	0.866715	0.843563	0.747759	0.80413	0.775766	0.755743	0.696513	0.819996	0.77536	0.794883	0.875274	0.867089	0.863492	0.853665	0.889301	0.891547	0.902756	0.843004	0.865253	0.827802	0.866889	0.808914	0.846322	0.854793	0.816534	0.888294	0.903557	0.86685	0.76229	0.76078	0.782375	0.777682	0.78553	0.743866	0.599207	0.741289	0.762362
-4200	0.859406	0.872026	0.872496	0.842037	0.746433	0.802973	0.779394	0.761343	0.701087	0.830227	0.753943	0.801791	0.88294	0.873829	0.86521	0.854493	0.893826	0.889411	0.907617	0.83987	0.868639	0.84004	0.876407	0.812088	0.85133	0.864683	0.823972	0.893136	0.902736	0.865798	0.772767	0.763356	0.789575	0.786422	0.783666	0.736827	0.602839	0.748668	0.764759
-4100	0.861562	0.866709	0.873111	0.840082	0.752853	0.802128	0.777994	0.759007	0.712033	0.831987	0.758447	0.797037	0.884809	0.874198	0.860378	0.858625	0.898381	0.887246	0.905264	0.841234	0.864953	0.832253	0.872418	0.80667	0.854368	0.870051	0.829832	0.896989	0.902616	0.856825	0.788171	0.768899	0.782091	0.795457	0.773141	0.747202	0.608525	0.752524	0.768736
-4000	0.869006	0.869984	0.874639	0.845855	0.768526	0.80222	0.787556	0.756736	0.70767	0.833286	0.781603	0.804893	0.888543	0.877167	0.863519	0.865732	0.89742	0.88971	0.911607	0.844865	0.872291	0.816657	0.864929	0.805968	0.85839	0.878463	0.834253	0.899891	0.906781	0.859463	0.801928	0.774262	0.780521	0.812287	0.797058	0.76318	0.630478	0.763564	0.774111
-3900	0.859928	0.881699	0.879918	0.852597	0.781813	0.819412	0.799349	0.758081	0.707882	0.834506	0.7716	0.816307	0.895449	0.887857	0.876432	0.871308	0.903442	0.901733	0.917513	0.85496	0.881182	0.821621	0.869045	0.808902	0.86048	0.877082	0.843048	0.898074	0.915485	0.870902	0.813701	0.794024	0.792943	0.813279	0.817087	0.776245	0.642315	0.772539	0.785337
-3800	0.860844	0.888852	0.889437	0.862438	0.797404	0.826153	0.805803	0.769885	0.732558	0.841328	0.790799	0.822073	0.893337	0.892276	0.885196	0.87479	0.905423	0.908029	0.921846	0.864544	0.885298	0.836908	0.874821	0.822029	0.866229	0.873313	0.855245	0.899608	0.916853	0.878655	0.819244	0.794601	0.795339	0.817647	0.810593	0.790427	0.643121	0.780484	0.794351
-3700	0.863154	0.887584	0.888102	0.861975	0.795322	0.821698	0.802846	0.77398	0.725948	0.844576	0.811018	0.819238	0.888378	0.890882	0.883587	0.866447	0.902296	0.907501	0.920899	0.865772	0.881778	0.836591	0.879249	0.823408	0.866935	0.87335	0.857612	0.898341	0.918752	0.879104	0.808047	0.796051	0.797606	0.810033	0.810096	0.790248	0.645022	0.776157	0.790291
-3600	0.874011	0.877046	0.873112	0.849837	0.773902	0.811778	0.789675	0.770053	0.719945	0.839817	0.808664	0.801953	0.880292	0.878812	0.867383	0.856505	0.894893	0.897352	0.91425	0.858064	0.87441	0.826562	0.873757	0.809691	0.862082	0.866667	0.845128	0.888935	0.909797	0.875032	0.782291	0.782345	0.789719	0.793635	0.797953	0.770453	0.628893	0.758038	0.772723
-3500	0.861796	0.873328	0.86424	0.836109	0.75503	0.795586	0.769904	0.761966	0.709186	0.830917	0.777912	0.791835	0.868766	0.869867	0.858103	0.849139	0.897482	0.88374	0.904879	0.862949	0.876426	0.83021	0.875574	0.805364	0.858403	0.849241	0.824921	0.885074	0.902651	0.866478	0.771265	0.762289	0.773571	0.789218	0.789278	0.765787	0.61369	0.739448	0.752768
-3400	0.875921	0.877768	0.861457	0.835737	0.735278	0.784771	0.759915	0.756008	0.722203	0.8328	0.781459	0.781752	0.86728	0.867404	0.857026	0.842492	0.902246	0.878068	0.905195	0.861032	0.878594	0.834296	0.872219	0.812556	0.860776	0.827268	0.812342	0.886043	0.902357	0.870663	0.762219	0.755408	0.756816	0.778759	0.776651	0.740675	0.579777	0.734455	0.74152
-3300	0.867362	0.879083	0.864242	0.841347	0.733023	0.783306	0.7697	0.758114	0.731848	0.838973	0.776146	0.78872	0.870027	0.87055	0.862259	0.835505	0.911949	0.87342	0.912906	0.864591	0.88252	0.835204	0.874481	0.82487	0.861297	0.811411	0.814165	0.891708	0.907115	0.875388	0.762896	0.738686	0.767136	0.782141	0.772213	0.734504	0.575094	0.738357	0.745326
-3200	0.868661	0.878552	0.87343	0.849354	0.727536	0.796279	0.780733	0.757155	0.715642	0.845516	0.771521	0.804608	0.881237	0.876583	0.870914	0.838069	0.913648	0.886194	0.916153	0.872666	0.886017	0.832766	0.881778	0.822126	0.861385	0.817442	0.83747	0.898553	0.911751	0.875936	0.763886	0.762224	0.781265	0.780324	0.781392	0.738138	0.583803	0.743025	0.75192
-3100	0.88153	0.884505	0.884168	0.857689	0.742854	0.810544	0.795799	0.761524	0.707555	0.845936	0.766198	0.811503	0.892372	0.885227	0.872217	0.858814	0.917526	0.909855	0.918953	0.875455	0.892966	0.835491	0.890787	0.833321	0.867445	0.841496	0.852089	0.910934	0.922482	0.885291	0.782979	0.781579	0.800425	0.797982	0.803951	0.74416	0.606591	0.75311	0.776328
-3000	0.885141	0.895378	0.892097	0.861024	0.777043	0.805052	0.806582	0.766122	0.72585	0.843358	0.769021	0.823096	0.903127	0.892593	0.873862	0.869645	0.923457	0.921042	0.931399	0.874765	0.902064	0.849765	0.892503	0.844671	0.873018	0.871112	0.861025	0.914171	0.925291	0.891056	0.799325	0.783754	0.80111	0.817806	0.808803	0.764183	0.621254	0.768293	0.794676
-2900	0.896499	0.902366	0.891961	0.863965	0.791176	0.804909	0.811067	0.777222	0.735242	0.84463	0.80242	0.833889	0.911937	0.891271	0.88066	0.872538	0.927908	0.928727	0.936628	0.876863	0.902299	0.857628	0.891988	0.843709	0.875398	0.882244	0.862717	0.917812	0.933186	0.90118	0.81059	0.796371	0.806103	0.825036	0.816746	0.793556	0.622398	0.776241	0.796392
-2800	0.891463	0.906181	0.894814	0.86503	0.790367	0.817692	0.809197	0.785524	0.742998	0.846057	0.824197	0.825795	0.907371	0.891693	0.884786	0.873889	0.926722	0.931503	0.938534	0.880343	0.896831	0.860235	0.888811	0.839304	0.875419	0.87986	0.86271	0.915777	0.931591	0.900196	0.808783	0.803385	0.807987	0.833385	0.819171	0.810319	0.623585	0.772126	0.787842
-2700	0.907133	0.903384	0.898508	0.870829	0.784479	0.817738	0.807445	0.786896	0.755496	0.850508	0.823222	0.81462	0.904826	0.897655	0.881543	0.870775	0.926242	0.929109	0.935751	0.886103	0.899248	0.85076	0.889512	0.835453	0.879258	0.88649	0.853476	0.912242	0.924692	0.89217	0.798253	0.778238	0.800103	0.826265	0.811168	0.785867	0.617385	0.766702	0.790934
-2600	0.901507	0.89709	0.894691	0.867592	0.780364	0.801014	0.801073	0.779639	0.754774	0.852783	0.777039	0.817258	0.903115	0.896186	0.884128	0.861059	0.922454	0.919251	0.933586	0.880766	0.899809	0.840356	0.88513	0.829795	0.879582	0.874882	0.844593	0.911937	0.922128	0.886487	0.777042	0.760343	0.788122	0.810233	0.803078	0.76423	0.604023	0.757627	0.783691
-2500	0.901984	0.892113	0.891356	0.864257	0.782737	0.803205	0.795243	0.773778	0.756174	0.850164	0.782511	0.810378	0.899295	0.894535	0.886069	0.864455	0.914917	0.914203	0.936442	0.87524	0.892896	0.835601	0.879398	0.833939	0.878762	0.86816	0.843038	0.908416	0.918258	0.88455	0.78415	0.768821	0.782343	0.818781	0.797178	0.769302	0.610605	0.75345	0.783553
-2400	0.871434	0.889644	0.891101	0.861208	0.777594	0.812607	0.800326	0.765505	0.705529	0.842554	0.725111	0.801624	0.90035	0.896352	0.886562	0.872015	0.912864	0.913221	0.931857	0.869584	0.890873	0.834938	0.874548	0.822188	0.868955	0.879211	0.846038	0.909672	0.914597	0.882723	0.798175	0.771901	0.787186	0.814989	0.79816	0.767241	0.618516	0.751671	0.785365
-2300	0.875791	0.887173	0.891327	0.854241	0.780203	0.811553	0.803052	0.756135	0.70643	0.832498	0.777556	0.802545	0.900362	0.891537	0.876617	0.87345	0.912897	0.917212	0.922545	0.869063	0.888177	0.837805	0.869067	0.814802	0.861074	0.881881	0.846717	0.911694	0.921952	0.878165	0.802322	0.77987	0.790544	0.812593	0.793476	0.773183	0.619872	0.749855	0.785616
-2200	0.871829	0.886492	0.88198	0.850738	0.770308	0.810777	0.799195	0.757574	0.715893	0.82912	0.765161	0.809338	0.901683	0.898734	0.875506	0.872366	0.912479	0.912751	0.916277	0.868254	0.883539	0.838224	0.869239	0.818332	0.859116	0.873025	0.845272	0.912153	0.927396	0.879199	0.799777	0.781041	0.792679	0.811328	0.796835	0.774582	0.61209	0.748121	0.787098
-2100	0.881226	0.882792	0.874259	0.845272	0.758465	0.797791	0.789663	0.756159	0.718302	0.832159	0.775916	0.79625	0.89443	0.889471	0.868175	0.857832	0.905732	0.903519	0.9143	0.858905	0.88655	0.83125	0.873662	0.815849	0.861457	0.854052	0.832387	0.905875	0.913967	0.871377	0.771676	0.755065	0.781359	0.798499	0.791166	0.762689	0.593227	0.740895	0.777534
-2000	0.864433	0.878073	0.871848	0.844436	0.747122	0.797358	0.782446	0.749596	0.715669	0.83617	0.798344	0.794599	0.889965	0.882096	0.866021	0.845822	0.901308	0.900091	0.913951	0.86194	0.882796	0.826318	0.87453	0.81717	0.865092	0.846521	0.825492	0.902542	0.901475	0.861575	0.756313	0.739705	0.763246	0.785798	0.78631	0.741005	0.573419	0.727821	0.752482
-1900	0.850747	0.870555	0.863527	0.839849	0.734796	0.786014	0.765602	0.740143	0.710927	0.838791	0.786679	0.791962	0.874863	0.874374	0.863405	0.843731	0.905788	0.899171	0.907964	0.851283	0.878993	0.828598	0.865775	0.814542	0.86257	0.831526	0.812645	0.902319	0.903196	0.859988	0.7469	0.730325	0.757437	0.76015	0.766252	0.722475	0.547577	0.709354	0.732159
-1800	0.861653	0.874767	0.861455	0.839997	0.731002	0.779785	0.765158	0.739606	0.724641	0.843403	0.808019	0.783853	0.872286	0.880058	0.863578	0.843376	0.904216	0.900166	0.908192	0.850896	0.876099	0.836854	0.868499	0.823495	0.863856	0.831027	0.807783	0.901891	0.90726	0.859158	0.746636	0.736789	0.764753	0.772371	0.775985	0.721698	0.546427	0.712497	0.729224
-1700	0.862547	0.869168	0.855478	0.840694	0.734418	0.774569	0.764464	0.744337	0.691553	0.839931	0.776021	0.778705	0.866662	0.874245	0.858809	0.840582	0.898925	0.89086	0.903811	0.838413	0.876151	0.820177	0.867929	0.8185	0.859431	0.830561	0.811802	0.897913	0.911622	0.850647	0.755172	0.725173	0.748381	0.766355	0.756402	0.709252	0.534287	0.706702	0.728417
-1600	0.879233	0.867699	0.850064	0.836417	0.731401	0.78618	0.762212	0.743976	0.728803	0.839843	0.801714	0.772625	0.87542	0.867505	0.853613	0.844512	0.895771	0.880426	0.902665	0.843965	0.872936	0.817649	0.867074	0.806083	0.857776	0.823179	0.811741	0.895662	0.909953	0.852009	0.759453	0.742221	0.746688	0.771013	0.748289	0.718967	0.551934	0.709043	0.737616
-1500	0.860651	0.864944	0.856722	0.836472	0.738247	0.779592	0.768201	0.758396	0.712689	0.840674	0.814288	0.778116	0.878252	0.86865	0.8594	0.843798	0.900798	0.886951	0.904208	0.857352	0.879547	0.8375	0.877236	0.811007	0.859778	0.811691	0.814496	0.892849	0.897305	0.863206	0.766453	0.758108	0.759417	0.781203	0.769616	0.734958	0.581132	0.7294	0.753654
-1400	0.861672	0.869837	0.863438	0.841161	0.739589	0.789992	0.782161	0.774657	0.73535	0.845386	0.815153	0.783074	0.874993	0.872985	0.866138	0.859608	0.911717	0.900106	0.914211	0.864933	0.885672	0.850816	0.88494	0.829481	0.866932	0.818934	0.822939	0.907078	0.889838	0.884557	0.775439	0.752867	0.783233	0.790335	0.781862	0.754961	0.609062	0.747303	0.771545
-1300	0.883564	0.883715	0.868969	0.851144	0.761114	0.801014	0.783692	0.780788	0.750491	0.847487	0.795895	0.799254	0.87938	0.878339	0.867289	0.870935	0.906655	0.911077	0.92271	0.871571	0.884271	0.861385	0.891579	0.841479	0.871265	0.846129	0.83179	0.909607	0.90829	0.894145	0.787616	0.773275	0.792438	0.804577	0.797753	0.768336	0.621215	0.756384	0.782284
-1200	0.878974	0.887671	0.870276	0.859263	0.76902	0.811449	0.787761	0.783842	0.718195	0.845732	0.774067	0.799825	0.876261	0.884553	0.869688	0.879225	0.902351	0.920634	0.920152	0.881248	0.883477	0.853809	0.883163	0.83584	0.873288	0.856643	0.835321	0.913803	0.919527	0.892218	0.799768	0.790316	0.796245	0.805446	0.801821	0.774561	0.615742	0.752279	0.782506
-1100	0.866038	0.882771	0.86691	0.860074	0.769338	0.807017	0.7889	0.782322	0.706689	0.841096	0.764249	0.807585	0.877152	0.892066	0.872436	0.877794	0.900894	0.926126	0.911663	0.883848	0.880243	0.850992	0.882481	0.841616	0.866944	0.850492	0.840633	0.917169	0.921135	0.893607	0.812897	0.803993	0.804101	0.816359	0.806015	0.781442	0.609535	0.74789	0.773397
-1000	0.880699	0.878453	0.870324	0.851166	0.763718	0.794657	0.792183	0.773045	0.710225	0.836503	0.772689	0.813404	0.876576	0.892139	0.872319	0.87401	0.903949	0.916751	0.908013	0.878758	0.890558	0.843467	0.886747	0.849501	0.871201	0.848177	0.843158	0.915598	0.914693	0.883101	0.818805	0.805646	0.805605	0.809525	0.802319	0.764682	0.592995	0.753786	0.77483
-900	0.8816	0.876262	0.869676	0.840193	0.744219	0.795788	0.790489	0.763508	0.736968	0.832121	0.779762	0.796808	0.883843	0.884403	0.870994	0.857998	0.908673	0.896862	0.910305	0.870217	0.889006	0.834944	0.879343	0.838373	0.869677	0.839966	0.841907	0.908199	0.912464	0.866534	0.794501	0.781251	0.785234	0.797796	0.787322	0.769897	0.585563	0.757342	0.783182
-800	0.868678	0.873457	0.870736	0.841954	0.754546	0.800344	0.788727	0.749121	0.728425	0.836684	0.786341	0.788695	0.893004	0.879362	0.863225	0.857212	0.907174	0.894833	0.90777	0.863431	0.88058	0.834993	0.867704	0.815997	0.865132	0.847578	0.843654	0.902395	0.914147	0.866689	0.78483	0.757515	0.769657	0.800576	0.786242	0.774266	0.586558	0.756863	0.781089
-700	0.85551	0.867642	0.8678	0.840697	0.761409	0.796897	0.792394	0.741623	0.715731	0.839198	0.769695	0.791714	0.886746	0.876675	0.859345	0.850387	0.89686	0.887473	0.909289	0.855357	0.878586	0.836417	0.869815	0.804531	0.860412	0.851506	0.837558	0.89493	0.906621	0.864286	0.780223	0.740173	0.769991	0.799878	0.796878	0.765106	0.577341	0.754475	0.767197
-600	0.840919	0.870716	0.861592	0.843668	0.752448	0.787914	0.786394	0.74878	0.691314	0.834834	0.753967	0.793227	0.88097	0.876223	0.864189	0.842061	0.899379	0.889594	0.91229	0.856727	0.877455	0.839559	0.873391	0.814831	0.857696	0.851503	0.829443	0.892414	0.898999	0.853472	0.788613	0.741394	0.783654	0.796923	0.799678	0.753623	0.573276	0.744898	0.764682
-500	0.85726	0.863197	0.857384	0.834908	0.74849	0.782291	0.770416	0.75326	0.706347	0.823409	0.786768	0.778622	0.873492	0.871213	0.859608	0.822677	0.895922	0.885724	0.906183	0.845996	0.869635	0.831371	0.865094	0.813927	0.854108	0.841588	0.817325	0.877553	0.890807	0.843961	0.787614	0.771822	0.773043	0.794725	0.78678	0.748084	0.587761	0.74222	0.765447
-400	0.800549	0.844768	0.838156	0.827942	0.737722	0.772921	0.749674	0.730928	0.709722	0.803471	0.787079	0.774304	0.841893	0.845225	0.835719	0.787787	0.895582	0.869055	0.879431	0.829085	0.847856	0.808184	0.839416	0.793325	0.822866	0.82112	0.78934	0.85173	0.892299	0.854367	0.76848	0.759766	0.765983	0.772726	0.774326	0.749448	0.577069	0.724031	0.734464
-300	0.740582	0.822536	0.807776	0.803871	0.717073	0.745878	0.72427	0.722172	0.687446	0.789831	0.794233	0.7801	0.782537	0.815079	0.790836	0.753796	0.880359	0.836104	0.857442	0.811988	0.800133	0.769756	0.799231	0.757176	0.805843	0.769993	0.74902	0.815198	0.881068	0.858343	0.724185	0.732693	0.752796	0.750942	0.752116	0.739765	0.572181	0.698011	0.697873
-200	0.817726	0.807969	0.771701	0.771181	0.661682	0.699167	0.693343	0.707633	0.694477	0.794119	0.803782	0.736073	0.747274	0.761977	0.714515	0.697312	0.849826	0.779033	0.844422	0.712061	0.737226	0.677389	0.747123	0.667994	0.810342	0.705949	0.703126	0.777413	0.855856	0.831467	0.630268	0.659786	0.678021	0.669291	0.630964	0.65562	0.514842	0.66814	0.645896
-100	0.890373	0.798124	0.751623	0.758365	0.610011	0.661212	0.671679	0.711882	0.736805	0.808583	0.755724	0.715063	0.741057	0.718311	0.679118	0.663418	0.842039	0.738357	0.83823	0.626855	0.712382	0.619069	0.718369	0.605518	0.81512	0.65324	0.676103	0.769358	0.817375	0.795531	0.551829	0.572137	0.595976	0.586183	0.502051	0.566473	0.45195	0.640022	0.608693
0	0.847819	0.809579	0.77561	0.768938	0.618848	0.67099	0.690222	0.744529	0.747764	0.837543	0.769526	0.745837	0.787646	0.775808	0.767202	0.746783	0.864888	0.778216	0.846406	0.749836	0.815642	0.760912	0.819949	0.714264	0.825874	0.673624	0.692408	0.836468	0.833053	0.798374	0.626245	0.619962	0.683263	0.658655	0.589712	0.614065	0.479585	0.647818	0.627919
100	0.810296	0.822314	0.803128	0.78403	0.681203	0.702584	0.719339	0.737063	0.730535	0.829059	0.809815	0.716861	0.8163	0.812414	0.810731	0.829443	0.858353	0.804726	0.850512	0.820484	0.861789	0.824896	0.860666	0.81175	0.822084	0.732815	0.726749	0.863357	0.852732	0.808166	0.693968	0.692645	0.740665	0.752822	0.76187	0.691707	0.523398	0.698995	0.722162
200	0.729263	0.843886	0.824008	0.813866	0.712165	0.750426	0.736269	0.740791	0.678781	0.823017	0.736328	0.748019	0.850455	0.861437	0.859088	0.872165	0.861034	0.8509	0.871633	0.861796	0.872824	0.853182	0.885447	0.841161	0.827402	0.778384	0.765329	0.896699	0.886475	0.847718	0.772931	0.757524	0.789227	0.80632	0.825143	0.766888	0.553198	0.717103	0.758267
300	0.731913	0.852354	0.829402	0.826523	0.714939	0.768187	0.750632	0.751782	0.621199	0.818866	0.668957	0.778798	0.873698	0.882349	0.87966	0.881375	0.855784	0.866372	0.884581	0.86139	0.862413	0.835219	0.882343	0.821881	0.83377	0.798988	0.772417	0.912555	0.906049	0.870575	0.784523	0.743031	0.781033	0.799688	0.78724	0.752654	0.548011	0.714226	0.763141
400	0.786561	0.838329	0.820463	0.808682	0.696193	0.751646	0.741385	0.754886	0.65307	0.82228	0.681621	0.782425	0.880272	0.872009	0.875391	0.862854	0.840224	0.838129	0.875254	0.824884	0.841835	0.792596	0.856816	0.776663	0.824192	0.788695	0.747053	0.904723	0.90047	0.852465	0.763939	0.689168	0.74458	0.769203	0.739185	0.704745	0.536476	0.707613	0.744934
500	0.80996	0.802841	0.789103	0.788272	0.648871	0.722572	0.710044	0.740207	0.696404	0.816744	0.724434	0.766269	0.8581	0.845949	0.847998	0.833995	0.823719	0.817146	0.846559	0.790456	0.819884	0.772808	0.824748	0.757386	0.803315	0.757609	0.710672	0.890887	0.882727	0.834427	0.718364	0.659909	0.709973	0.725859	0.694082	0.646549	0.49968	0.675736	0.714073
600	0.770777	0.787846	0.778309	0.78616	0.627218	0.718872	0.704088	0.737085	0.676221	0.817049	0.729217	0.763546	0.847141	0.836487	0.844819	0.807314	0.816887	0.791467	0.825601	0.791446	0.811482	0.780002	0.818907	0.773331	0.797064	0.728079	0.695167	0.880784	0.870314	0.815487	0.698057	0.663808	0.702717	0.704363	0.69111	0.635386	0.496082	0.665841	0.701505
700	0.737534	0.778672	0.76439	0.777254	0.636509	0.711192	0.700683	0.733952	0.624451	0.80372	0.72002	0.759256	0.841431	0.828048	0.839651	0.79258	0.812346	0.769906	0.82711	0.786967	0.803873	0.778939	0.819738	0.770699	0.792266	0.714835	0.694096	0.873931	0.8688	0.808137	0.687965	0.654559	0.711147	0.683908	0.688364	0.640401	0.496395	0.651981	0.685727
800	0.725691	0.777765	0.751953	0.769069	0.644218	0.697125	0.697035	0.723707	0.638746	0.805913	0.690255	0.750708	0.836498	0.827115	0.833423	0.787291	0.816804	0.766946	0.834257	0.785094	0.799726	0.777667	0.819157	0.761078	0.787211	0.714055	0.702759	0.872575	0.870702	0.827814	0.689591	0.648993	0.693818	0.684067	0.681195	0.635492	0.502251	0.655429	0.676287
900	0.73289	0.775867	0.751601	0.766266	0.637471	0.695317	0.695977	0.713866	0.646644	0.813396	0.731214	0.753887	0.835959	0.827278	0.830315	0.775575	0.817964	0.765962	0.830521	0.774253	0.799136	0.772034	0.805725	0.746657	0.784113	0.719176	0.697938	0.869828	0.861518	0.829015	0.683977	0.641435	0.686988	0.667838	0.663785	0.628179	0.509886	0.660461	0.680409
1000	0.741223	0.776453	0.758104	0.770565	0.633575	0.70829	0.702469	0.710095	0.659749	0.810505	0.753849	0.770272	0.842876	0.847986	0.833359	0.77019	0.820326	0.76687	0.824147	0.76731	0.806842	0.759422	0.803831	0.743392	0.776568	0.724514	0.702886	0.86933	0.861526	0.818536	0.688257	0.642173	0.694536	0.679275	0.679483	0.624026	0.518426	0.657059	0.681042
1100	0.735618	0.767322	0.756406	0.76326	0.63192	0.698584	0.70172	0.710444	0.640887	0.813551	0.73295	0.783229	0.844372	0.853954	0.828028	0.774374	0.818482	0.771528	0.814999	0.768534	0.787125	0.753562	0.79961	0.740103	0.76326	0.739863	0.699264	0.867404	0.873673	0.821601	0.695181	0.655725	0.698991	0.698399	0.699153	0.628761	0.525462	0.663386	0.690814
1200	0.726598	0.772561	0.758137	0.75931	0.646481	0.702852	0.71023	0.714932	0.636616	0.815945	0.740715	0.770927	0.849225	0.852487	0.832198	0.783362	0.830308	0.772472	0.816801	0.76425	0.781066	0.761725	0.805705	0.751366	0.770959	0.752647	0.708381	0.872497	0.882951	0.827589	0.693556	0.661954	0.696126	0.713228	0.697901	0.638856	0.539553	0.669837	0.704388
1300	0.759326	0.774094	0.758018	0.759537	0.6552	0.701164	0.705328	0.714597	0.687171	0.815889	0.781674	0.757983	0.855057	0.848894	0.834372	0.78256	0.826977	0.76534	0.818569	0.76771	0.783892	0.760018	0.807696	0.750598	0.772351	0.755346	0.720224	0.871403	0.88524	0.826365	0.683898	0.648528	0.679829	0.704031	0.701232	0.63713	0.532646	0.675552	0.707974
1400	0.758109	0.774759	0.765566	0.780082	0.664248	0.73128	0.709311	0.722223	0.671744	0.817849	0.747754	0.778138	0.867507	0.855772	0.841692	0.793357	0.827005	0.78309	0.818711	0.774049	0.789227	0.767207	0.801498	0.748968	0.770793	0.769887	0.728145	0.87512	0.887507	0.833583	0.700332	0.671648	0.690897	0.721583	0.717436	0.662829	0.547526	0.682107	0.711094
1500	0.758417	0.770221	0.764232	0.795144	0.684777	0.731327	0.728075	0.720395	0.669033	0.809821	0.710988	0.786115	0.868556	0.85918	0.841266	0.799693	0.823181	0.796284	0.819317	0.776678	0.78965	0.765259	0.800891	0.746899	0.760235	0.777811	0.730873	0.876465	0.888773	0.844639	0.736336	0.697822	0.710501	0.736493	0.715922	0.684622	0.562951	0.685994	0.708758
1600	0.754603	0.76481	0.763216	0.784799	0.676675	0.72833	0.720162	0.719575	0.640039	0.803117	0.711612	0.791879	0.86275	0.859985	0.83681	0.792422	0.817967	0.789431	0.817282	0.777432	0.782499	0.767816	0.797318	0.734582	0.750956	0.777743	0.732539	0.872729	0.894036	0.849791	0.733106	0.698443	0.713372	0.736865	0.728846	0.685859	0.563503	0.686515	0.708366
1700	0.733005	0.750707	0.749243	0.767973	0.653932	0.697818	0.697919	0.70425	0.630207	0.798483	0.728332	0.766949	0.853215	0.841613	0.833679	0.774042	0.806554	0.779464	0.807157	0.753764	0.771454	0.756834	0.785248	0.714684	0.749369	0.767176	0.711001	0.861945	0.882484	0.832761	0.691803	0.668611	0.689749	0.707358	0.697342	0.659607	0.533582	0.668692	0.700224
1800	0.726367	0.745818	0.744612	0.752465	0.632902	0.67371	0.686785	0.697757	0.640046	0.795735	0.724715	0.742619	0.829425	0.825958	0.824542	0.75698	0.792677	0.756213	0.792722	0.742386	0.766895	0.745677	0.789015	0.712212	0.743194	0.727849	0.694394	0.851188	0.864673	0.808851	0.668109	0.639132	0.666046	0.69072	0.667161	0.621281	0.518752	0.658621	0.682609
1900	0.719481	0.737238	0.73445	0.742654	0.621295	0.668655	0.676065	0.691059	0.61354	0.785987	0.733709	0.736653	0.820943	0.823732	0.814507	0.748904	0.78519	0.746043	0.790334	0.728507	0.762882	0.744194	0.788263	0.716467	0.730575	0.70632	0.680409	0.842388	0.857209	0.795923	0.662568	0.626513	0.650456	0.673467	0.653434	0.602393	0.502552	0.641054	0.670324
2000	0.705766	0.724123	0.722209	0.735764	0.614853	0.662133	0.672676	0.678866	0.616894	0.772773	0.715963	0.724	0.825422	0.816513	0.808725	0.740732	0.780793	0.737027	0.77976	0.729135	0.751632	0.723094	0.770421	0.694771	0.72275	0.718516	0.678595	0.840662	0.860656	0.79966	0.65989	0.625056	0.656294	0.653852	0.656745	0.597284	0.476185	0.62114	0.662595
2100	0.690876	0.724545	0.730036	0.73386	0.606563	0.66404	0.667113	0.676463	0.628847	0.765596	0.723731	0.727274	0.834468	0.821738	0.817397	0.742369	0.784536	0.73664	0.782585	0.737592	0.750429	0.726857	0.765175	0.688469	0.714391	0.720665	0.668695	0.843721	0.866898	0.796883	0.654604	0.632371	0.660053	0.659133	0.66362	0.598586	0.469674	0.620882	0.66827
2200	0.69511	0.73001	0.733243	0.736621	0.605712	0.673099	0.67389	0.683047	0.626308	0.768871	0.70742	0.748456	0.833307	0.823387	0.820985	0.742738	0.778449	0.731416	0.783882	0.73885	0.769829	0.737032	0.776954	0.705479	0.72014	0.712502	0.666541	0.844405	0.868475	0.789881	0.662626	0.629946	0.654055	0.675028	0.683339	0.608904	0.491309	0.626579	0.682267
2300	0.690589	0.733086	0.722554	0.737147	0.621901	0.672019	0.68143	0.689999	0.605272	0.777717	0.686625	0.755267	0.829481	0.823068	0.820883	0.745244	0.771394	0.725317	0.783767	0.751172	0.781967	0.750802	0.783372	0.724845	0.728503	0.708363	0.672437	0.840596	0.8585	0.790641	0.663944	0.629744	0.65123	0.685508	0.689646	0.61881	0.510795	0.637958	0.680193
2400	0.686167	0.71988	0.710727	0.729551	0.620299	0.659264	0.67542	0.677557	0.618889	0.781282	0.682282	0.726146	0.807305	0.805982	0.807496	0.736577	0.771136	0.701957	0.777153	0.742321	0.771097	0.741781	0.77915	0.715376	0.724095	0.687589	0.663119	0.834212	0.85147	0.780016	0.638891	0.619016	0.644396	0.664996	0.655408	0.608321	0.486	0.631995	0.670548
2500	0.726567	0.706882	0.697628	0.718232	0.595342	0.647885	0.668283	0.660823	0.628991	0.784504	0.743932	0.710873	0.795474	0.791112	0.796553	0.735015	0.780788	0.690185	0.767709	0.715266	0.7563	0.71445	0.767542	0.685866	0.718935	0.670495	0.649709	0.827346	0.842853	0.772267	0.626793	0.606042	0.628549	0.651647	0.637137	0.600467	0.47139	0.631237	0.662384
2600	0.725146	0.723127	0.713445	0.727361	0.599898	0.664408	0.675709	0.6741	0.650192	0.789538	0.750378	0.727881	0.811578	0.797983	0.80405	0.745923	0.787471	0.707829	0.766043	0.72069	0.762983	0.721452	0.775336	0.697862	0.722717	0.674813	0.652667	0.828513	0.85163	0.784039	0.634637	0.617002	0.640086	0.663123	0.651201	0.59989	0.490753	0.647686	0.666722
2700	0.708017	0.747973	0.730921	0.743081	0.627339	0.6728	0.687571	0.692749	0.665273	0.796448	0.749946	0.739385	0.825226	0.816901	0.820713	0.759173	0.794694	0.733505	0.781409	0.749826	0.783022	0.752526	0.788437	0.73919	0.738438	0.692724	0.669964	0.833756	0.842073	0.798346	0.650438	0.642484	0.660936	0.676283	0.681869	0.628221	0.520084	0.668451	0.677142
2800	0.697373	0.759002	0.747771	0.763453	0.659038	0.687902	0.6988	0.707433	0.647335	0.795348	0.738214	0.744855	0.825929	0.83383	0.821713	0.766403	0.796493	0.756043	0.802339	0.76579	0.801322	0.766603	0.799217	0.758125	0.750041	0.708833	0.700549	0.847153	0.856289	0.814957	0.679989	0.666203	0.674857	0.696166	0.700527	0.653254	0.531213	0.679977	0.688246
2900	0.714502	0.757477	0.743	0.774401	0.657445	0.683069	0.699143	0.693318	0.649972	0.793004	0.740511	0.742676	0.82231	0.832701	0.813572	0.764075	0.794451	0.761187	0.804293	0.75077	0.784034	0.753798	0.787862	0.737879	0.742673	0.72164	0.710227	0.854525	0.862911	0.816956	0.67909	0.660961	0.673051	0.708314	0.686799	0.645517	0.535025	0.677367	0.689823
3000	0.706703	0.758478	0.747477	0.77515	0.657619	0.681171	0.700285	0.701442	0.654695	0.796669	0.715894	0.766741	0.816078	0.839192	0.822587	0.75943	0.801033	0.758254	0.807031	0.752889	0.78549	0.754332	0.795661	0.736755	0.747749	0.726315	0.707784	0.853263	0.857103	0.820628	0.673918	0.666057	0.682878	0.708228	0.675009	0.637013	0.539892	0.673115	0.683819
3100	0.708864	0.755864	0.736861	0.776271	0.656268	0.683458	0.696014	0.714092	0.648399	0.79773	0.716499	0.775616	0.813143	0.831923	0.826122	0.751223	0.793848	0.752568	0.806195	0.756942	0.781981	0.760264	0.789963	0.745854	0.749426	0.709574	0.699216	0.84908	0.857465	0.830068	0.680278	0.660039	0.6863	0.709691	0.689362	0.64242	0.536823	0.661769	0.683291
3200	0.741287	0.753732	0.735331	0.772787	0.637514	0.682851	0.69135	0.710432	0.685004	0.799341	0.760047	0.765338	0.811003	0.815997	0.81648	0.741541	0.778322	0.725714	0.800444	0.756697	0.766851	0.7498	0.787108	0.738805	0.746811	0.687321	0.690037	0.838903	0.855888	0.830851	0.664554	0.643977	0.67662	0.681623	0.693279	0.629495	0.529035	0.665744	0.689215
3300	0.724029	0.75275	0.732708	0.757904	0.619782	0.671648	0.689304	0.704448	0.691127	0.789941	0.7607	0.740671	0.804374	0.80537	0.805103	0.734024	0.770374	0.711644	0.792678	0.743572	0.755121	0.748944	0.782857	0.727454	0.735034	0.687386	0.674758	0.831268	0.850999	0.816696	0.648365	0.652212	0.665265	0.676879	0.673076	0.629897	0.522843	0.659068	0.687382
3400	0.72475	0.735441	0.717728	0.744586	0.632638	0.673371	0.689024	0.7041	0.685292	0.783029	0.736743	0.744096	0.814597	0.808132	0.804279	0.728008	0.770862	0.697023	0.779615	0.741022	0.756488	0.738388	0.770253	0.713404	0.723053	0.708147	0.681291	0.821984	0.83334	0.803248	0.658241	0.660152	0.666874	0.68183	0.666275	0.636615	0.538107	0.656771	0.688197
3500	0.692568	0.719896	0.713601	0.747847	0.642476	0.697789	0.695227	0.687208	0.653522	0.775429	0.692996	0.755034	0.820339	0.812412	0.798487	0.734131	0.769541	0.700507	0.766793	0.724355	0.749768	0.719	0.750013	0.696306	0.706273	0.727284	0.681104	0.822945	0.840237	0.79486	0.678532	0.664267	0.67803	0.688737	0.672401	0.639127	0.550869	0.652903	0.68644
3600	0.675299	0.705743	0.719241	0.738363	0.649998	0.708503	0.697362	0.667939	0.628527	0.766782	0.674922	0.748301	0.816614	0.805487	0.800201	0.744359	0.779199	0.719281	0.762526	0.713854	0.736033	0.70856	0.744704	0.686446	0.699233	0.727688	0.674886	0.828997	0.843099	0.793553	0.680156	0.663156	0.678579	0.681153	0.674208	0.636161	0.542285	0.652484	0.683344
3700	0.681068	0.694048	0.709409	0.713265	0.635506	0.685553	0.688778	0.665433	0.615057	0.758513	0.67589	0.726834	0.806246	0.793711	0.800287	0.736843	0.775687	0.708696	0.754758	0.696196	0.71786	0.697783	0.731017	0.681597	0.699489	0.715662	0.664984	0.821232	0.838139	0.774589	0.659033	0.642122	0.654857	0.668826	0.650528	0.617036	0.536078	0.644135	0.680457
3800	0.700051	0.685769	0.693116	0.713246	0.621854	0.663051	0.68116	0.662275	0.639699	0.753295	0.692295	0.714854	0.792957	0.781659	0.798823	0.719251	0.769964	0.698832	0.744794	0.690037	0.721264	0.704336	0.730352	0.691573	0.699661	0.696316	0.654028	0.819324	0.833436	0.761047	0.65005	0.627996	0.640258	0.663036	0.631406	0.596972	0.525436	0.62973	0.66746
3900	0.660964	0.689849	0.692708	0.714345	0.61583	0.664667	0.672614	0.675807	0.615257	0.7495	0.689876	0.720338	0.776192	0.78266	0.79152	0.705565	0.771721	0.691131	0.7485	0.717022	0.73225	0.727082	0.746546	0.713776	0.702733	0.677067	0.640989	0.811374	0.835974	0.758178	0.648637	0.624593	0.656468	0.663299	0.649746	0.603482	0.519258	0.628666	0.663631
4000	0.679952	0.692011	0.695491	0.71344	0.605825	0.666569	0.667853	0.68612	0.616049	0.758603	0.708437	0.718413	0.786088	0.786972	0.788761	0.700764	0.764113	0.681533	0.752597	0.731925	0.739107	0.72624	0.754419	0.713338	0.71397	0.678766	0.637141	0.800625	0.823766	0.768963	0.634359	0.615453	0.642383	0.659544	0.653185	0.599292	0.526023	0.625126	0.659295
4100	0.649626	0.692956	0.703829	0.7132	0.594056	0.66702	0.664559	0.677838	0.629118	0.765755	0.690028	0.728201	0.799826	0.789013	0.789237	0.7058	0.75996	0.677951	0.751097	0.718496	0.733854	0.714112	0.751234	0.692866	0.71819	0.68973	0.641683	0.80881	0.819635	0.768766	0.629927	0.613762	0.631669	0.650693	0.643124	0.581598	0.505601	0.610283	0.646657
4200	0.675728	0.693366	0.70381	0.711119	0.599005	0.67176	0.66708	0.67194	0.625514	0.77024	0.711201	0.726769	0.809274	0.793519	0.795131	0.710931	0.759839	0.670628	0.753833	0.702053	0.730823	0.704108	0.73934	0.688487	0.719766	0.696497	0.644511	0.809589	0.82087	0.760185	0.626559	0.60133	0.628836	0.65771	0.643801	0.584313	0.489206	0.616539	0.649072
4300	0.659933	0.697107	0.709083	0.709654	0.610328	0.66979	0.674129	0.675084	0.617783	0.766533	0.705969	0.725838	0.810291	0.790075	0.795125	0.71443	0.751925	0.672434	0.757835	0.701886	0.72552	0.698721	0.743745	0.690282	0.716667	0.692206	0.650518	0.805039	0.816947	0.762923	0.634416	0.599109	0.639996	0.650829	0.650988	0.590245	0.51074	0.623886	0.648106
4400	0.664758	0.714523	0.712173	0.722598	0.619407	0.666704	0.674995	0.682087	0.628188	0.763512	0.703668	0.727955	0.808165	0.79524	0.797036	0.713541	0.751392	0.691196	0.767899	0.731023	0.72999	0.721845	0.759485	0.710794	0.70868	0.686063	0.64943	0.806074	0.829884	0.779166	0.644995	0.628669	0.649774	0.648672	0.661033	0.603312	0.513207	0.628788	0.650424
4500	0.676452	0.725797	0.718265	0.735602	0.634742	0.670864	0.6822	0.689688	0.607629	0.758561	0.69121	0.746195	0.796516	0.803922	0.802042	0.730982	0.758679	0.714907	0.767151	0.741644	0.74148	0.729239	0.759465	0.7165	0.712571	0.691734	0.658744	0.814399	0.842127	0.798618	0.661061	0.654663	0.654553	0.666983	0.671005	0.618358	0.525279	0.637423	0.652172
4600	0.700616	0.733315	0.717114	0.739719	0.651219	0.684355	0.688893	0.690079	0.628635	0.75981	0.710371	0.758878	0.79529	0.809321	0.799065	0.746609	0.763465	0.728797	0.769968	0.741653	0.748056	0.734309	0.749044	0.722095	0.711204	0.712744	0.668778	0.814692	0.841274	0.808514	0.677503	0.67293	0.675545	0.684676	0.695013	0.644126	0.537961	0.643229	0.660735
4700	0.695923	0.728237	0.714234	0.738464	0.651793	0.684065	0.689145	0.693785	0.668591	0.760735	0.729287	0.747611	0.7984	0.803316	0.793167	0.744621	0.762063	0.735964	0.76669	0.739545	0.74368	0.727963	0.74479	0.720118	0.711888	0.710914	0.679717	0.809704	0.825105	0.805823	0.672579	0.666313	0.680966	0.682754	0.697303	0.656573	0.551735	0.645747	0.666747
4800	0.694895	0.715355	0.707683	0.728301	0.646978	0.673565	0.690474	0.69032	0.655174	0.754829	0.752086	0.745242	0.78593	0.796644	0.792795	0.734326	0.760681	0.722189	0.754869	0.728059	0.733498	0.718272	0.741499	0.711246	0.709757	0.692736	0.676345	0.807969	0.806626	0.801867	0.657059	0.657085	0.681918	0.679096	0.676052	0.641777	0.57079	0.650423	0.667246
4900	0.703	0.703659	0.710036	0.727726	0.640841	0.675182	0.690224	0.690649	0.684796	0.755783	0.737772	0.732884	0.780284	0.791364	0.792574	0.731021	0.75832	0.700474	0.74204	0.710539	0.730543	0.713912	0.733344	0.700772	0.707242	0.701651	0.679751	0.804504	0.801117	0.781312	0.663022	0.652217	0.681516	0.677241	0.66021	0.6354	0.564916	0.655677	0.681054

## Sheet: Forks L>R CD tDNAs
bp_from_tDNA	rrm3_AA_1	rrm3_AA_2	rrm3_AA_2.1	rpc25_rrm3_1	rpc25_rrm3_2	rpc25_rrm3_3	rpc25_rpc82_rrm3_1	rpc25_rpc82_rrm3_2	rpc25_rpc82_rrm3_3	bdp1_rrm3_1	bdp1_rrm3_2	bdp1_rrm3_3	anchor_away_1	anchor_away_2	anchor_away_3	rrm3KO_1	rrm3KO_2	rrm3KO_3	TLS_rrm3_1	TLS_rrm3_2	TLS_rrm3_3	rad18_rrm3_1	rad18_rrm3_2	rad18_rrm3_3	brn1_rrm3_1	brn1_rrm3_2	brn1_rrm3_2techrep	KO_wt_bkg_1	KO_wt_bkg_2	KO_wt_bkg_3	top1_rrm3_1	top1_rrm3_2	top1_rrm3_3	top2_rrm3_1	top2_rrm3_2	top2_rrm3_3	top1_top2_rrm3_1	top1_top2_rrm3_2	top1_top2_rrm3_3
-4900	0.804073	0.826722	0.828335	0.831094	0.756265	0.798832	0.790872	0.761255	0.709861	0.80203	0.763369	0.791686	0.837665	0.830884	0.819068	0.818525	0.856003	0.841533	0.854269	0.808968	0.828498	0.774673	0.814469	0.763529	0.823077	0.836089	0.796698	0.841077	0.860906	0.814239	0.760658	0.722226	0.73355	0.766165	0.752706	0.714622	0.580136	0.696624	0.726333
-4800	0.819005	0.836888	0.836681	0.837784	0.758217	0.802325	0.799955	0.77539	0.746446	0.815715	0.797844	0.789654	0.83828	0.83538	0.823016	0.814755	0.864218	0.845945	0.864025	0.811169	0.842325	0.792815	0.82741	0.773118	0.833448	0.835376	0.800379	0.84451	0.868241	0.821964	0.753359	0.717622	0.730749	0.756851	0.75449	0.712171	0.572979	0.699961	0.7396
-4700	0.823657	0.843475	0.842191	0.843255	0.755036	0.794736	0.799568	0.783136	0.736713	0.823916	0.807939	0.785746	0.846234	0.835546	0.822736	0.818814	0.87207	0.856959	0.874346	0.812055	0.851435	0.803541	0.838044	0.776741	0.844584	0.833038	0.804451	0.853909	0.864766	0.830092	0.740538	0.710793	0.722	0.758401	0.75941	0.70966	0.551594	0.704405	0.738774
-4600	0.819784	0.853543	0.847368	0.84787	0.754824	0.795069	0.797155	0.785236	0.750572	0.829525	0.792669	0.798815	0.854706	0.844905	0.830115	0.82557	0.873287	0.854283	0.879621	0.820477	0.856252	0.807501	0.844509	0.781137	0.853868	0.838222	0.807122	0.861889	0.866246	0.843272	0.747283	0.729991	0.724632	0.767324	0.766514	0.714387	0.556071	0.706114	0.735189
-4500	0.828644	0.863867	0.849484	0.853594	0.76073	0.80764	0.809849	0.792758	0.750814	0.832266	0.767514	0.820515	0.867284	0.853238	0.838794	0.838707	0.888019	0.873553	0.884437	0.832347	0.852298	0.808077	0.849973	0.79209	0.858857	0.838447	0.81179	0.872961	0.884945	0.855721	0.751885	0.739672	0.747264	0.782521	0.770351	0.728685	0.567312	0.718574	0.735385
-4400	0.841976	0.871816	0.858425	0.857439	0.769631	0.817359	0.814849	0.797542	0.750889	0.835432	0.796249	0.828378	0.868753	0.861652	0.843736	0.846132	0.903127	0.895689	0.890965	0.841397	0.859047	0.8141	0.8501	0.788717	0.861556	0.841236	0.824459	0.884134	0.903053	0.866824	0.762421	0.755781	0.757118	0.787244	0.781126	0.736701	0.57839	0.722769	0.73193
-4300	0.849686	0.881506	0.873926	0.869101	0.778984	0.827092	0.824998	0.812012	0.760543	0.847155	0.816812	0.833236	0.871922	0.867732	0.855662	0.854614	0.909353	0.90144	0.911361	0.848904	0.873611	0.830132	0.860379	0.799984	0.873242	0.833929	0.845401	0.893301	0.913433	0.877954	0.773768	0.757901	0.77169	0.787057	0.785854	0.738803	0.587698	0.731085	0.743039
-4200	0.854587	0.881254	0.875302	0.874426	0.786974	0.834856	0.831134	0.820261	0.763616	0.853538	0.830096	0.837631	0.875831	0.874428	0.859854	0.859114	0.906579	0.908564	0.912734	0.858009	0.878652	0.83372	0.861099	0.811188	0.874416	0.838355	0.841044	0.897802	0.920636	0.881563	0.774092	0.760965	0.777796	0.792583	0.787805	0.746477	0.585649	0.722989	0.742063
-4100	0.852967	0.88476	0.876391	0.869076	0.776721	0.833228	0.823551	0.818023	0.761646	0.857481	0.813313	0.827272	0.876838	0.870732	0.857195	0.857033	0.907664	0.9047	0.915887	0.86086	0.883375	0.837548	0.875287	0.810567	0.875413	0.844923	0.834447	0.899024	0.916632	0.870266	0.763994	0.74715	0.764654	0.788498	0.78748	0.74198	0.564476	0.71821	0.734473
-4000	0.865767	0.883332	0.87707	0.870598	0.759296	0.827092	0.822488	0.810092	0.763303	0.856388	0.811449	0.828003	0.878446	0.871056	0.854013	0.855246	0.911048	0.900365	0.912994	0.853865	0.887343	0.832052	0.874442	0.807784	0.876931	0.846018	0.82839	0.900787	0.916228	0.861317	0.759043	0.72576	0.763491	0.784696	0.778263	0.722019	0.547852	0.712533	0.730367
-3900	0.880416	0.88728	0.871905	0.875309	0.747698	0.819799	0.822734	0.805013	0.764284	0.859808	0.818207	0.821636	0.884909	0.876043	0.859898	0.856705	0.914752	0.901971	0.919674	0.858093	0.895327	0.829772	0.87556	0.815482	0.87972	0.847192	0.822597	0.90154	0.917969	0.8563	0.753341	0.721372	0.756053	0.775914	0.778023	0.717485	0.543482	0.714703	0.730013
-3800	0.881464	0.893117	0.876239	0.877945	0.757188	0.819684	0.824472	0.813994	0.780181	0.867916	0.853706	0.835457	0.8959	0.882732	0.869474	0.85831	0.915363	0.908009	0.923991	0.864478	0.893739	0.838001	0.87872	0.818922	0.882962	0.85805	0.831872	0.904797	0.9166	0.866951	0.761449	0.752408	0.762025	0.789902	0.797913	0.736009	0.567308	0.721294	0.734256
-3700	0.865483	0.898049	0.884241	0.884025	0.785551	0.836398	0.834222	0.819077	0.773349	0.86949	0.858763	0.849875	0.900532	0.885066	0.872541	0.863471	0.923755	0.914064	0.926191	0.873729	0.886086	0.853035	0.883194	0.824671	0.88994	0.874194	0.844193	0.909385	0.922589	0.88684	0.775589	0.769814	0.786317	0.808842	0.807399	0.755764	0.576672	0.72581	0.742965
-3600	0.877932	0.902203	0.883933	0.887763	0.793914	0.844033	0.838671	0.821206	0.775759	0.864077	0.860164	0.846654	0.904422	0.886515	0.87498	0.862925	0.926264	0.914204	0.926554	0.881619	0.886887	0.847676	0.885481	0.833337	0.89338	0.873986	0.846579	0.908382	0.924847	0.887509	0.783124	0.765395	0.788428	0.817658	0.806466	0.749838	0.579151	0.733186	0.75478
-3500	0.882448	0.899561	0.886057	0.888184	0.793796	0.852033	0.841397	0.82275	0.780231	0.863092	0.843996	0.843017	0.902658	0.887782	0.874501	0.865067	0.926737	0.915313	0.925973	0.879171	0.888352	0.84974	0.882749	0.826717	0.890769	0.876498	0.846654	0.908708	0.924602	0.885524	0.783559	0.762141	0.787504	0.807893	0.803106	0.748261	0.58462	0.738299	0.758296
-3400	0.872657	0.89409	0.888937	0.887548	0.793423	0.849138	0.837874	0.823711	0.765129	0.868817	0.846334	0.835122	0.901667	0.886377	0.870347	0.862796	0.923639	0.914177	0.925768	0.868213	0.888434	0.841518	0.883266	0.815264	0.888912	0.879219	0.842378	0.908531	0.924875	0.873325	0.772051	0.746398	0.781677	0.80573	0.793421	0.739938	0.578706	0.732934	0.751997
-3300	0.873988	0.892201	0.889282	0.881697	0.782288	0.840979	0.833591	0.818632	0.779196	0.868137	0.836781	0.826793	0.897976	0.885497	0.865651	0.860206	0.922986	0.907226	0.925971	0.869535	0.889054	0.835724	0.88477	0.809175	0.887564	0.880085	0.837361	0.909352	0.922765	0.860603	0.771552	0.74258	0.762531	0.802326	0.783541	0.725935	0.552755	0.723483	0.744998
-3200	0.88012	0.891708	0.887928	0.878632	0.780462	0.833617	0.829052	0.81144	0.768374	0.863871	0.852166	0.835277	0.896583	0.886114	0.864215	0.863179	0.924351	0.907521	0.925893	0.874243	0.892208	0.835031	0.883649	0.807642	0.88058	0.879849	0.837221	0.909264	0.92303	0.861204	0.776584	0.736895	0.761688	0.802042	0.794515	0.721493	0.547134	0.723901	0.734621
-3100	0.868774	0.893145	0.883563	0.880823	0.773471	0.831953	0.826239	0.804218	0.737897	0.860359	0.824765	0.842478	0.894186	0.882536	0.861672	0.859336	0.924253	0.911101	0.925577	0.874148	0.891927	0.842049	0.887542	0.811307	0.874555	0.872205	0.83676	0.906648	0.92574	0.868041	0.777421	0.72999	0.759567	0.798472	0.798796	0.731903	0.554166	0.723508	0.733471
-3000	0.874465	0.896818	0.88394	0.881786	0.773918	0.835796	0.827681	0.802456	0.75383	0.858797	0.836656	0.839845	0.894638	0.879986	0.862832	0.856695	0.927839	0.915477	0.924863	0.875827	0.893433	0.846912	0.891534	0.82454	0.878323	0.865583	0.835904	0.903329	0.929721	0.872617	0.781617	0.734554	0.764028	0.796557	0.793504	0.737156	0.56948	0.72844	0.741294
-2900	0.873744	0.894772	0.87633	0.882274	0.771502	0.839672	0.827873	0.798206	0.751863	0.859676	0.840739	0.83141	0.892236	0.878427	0.862948	0.856077	0.927981	0.916009	0.927459	0.873184	0.897439	0.845999	0.892587	0.825868	0.875856	0.874525	0.839758	0.905717	0.925951	0.871792	0.777452	0.745855	0.766926	0.797658	0.791731	0.735771	0.574664	0.731803	0.743465
-2800	0.877199	0.89353	0.876635	0.881755	0.775399	0.837495	0.831061	0.804713	0.755407	0.86613	0.842807	0.832714	0.884854	0.879264	0.860937	0.861459	0.929928	0.915315	0.927895	0.873263	0.900971	0.84603	0.893379	0.835392	0.880002	0.867062	0.839477	0.911562	0.920378	0.871526	0.765224	0.745444	0.764329	0.797295	0.789178	0.73925	0.569103	0.731618	0.746257
-2700	0.884199	0.889168	0.881986	0.881171	0.778457	0.83487	0.832884	0.809125	0.785695	0.870865	0.849488	0.833558	0.887334	0.883311	0.863517	0.869577	0.930831	0.917442	0.929757	0.877083	0.902437	0.85773	0.892991	0.83703	0.883722	0.861956	0.839121	0.915152	0.92464	0.87536	0.778255	0.745831	0.775912	0.805663	0.789599	0.751695	0.597965	0.733963	0.758909
-2600	0.89018	0.897556	0.896765	0.887794	0.791433	0.84441	0.838747	0.817261	0.773207	0.879786	0.85567	0.850994	0.893836	0.894022	0.87589	0.874693	0.93086	0.919258	0.933657	0.887812	0.898509	0.862447	0.897942	0.840663	0.892526	0.875552	0.850513	0.915743	0.926815	0.884027	0.800778	0.762956	0.798271	0.819842	0.808619	0.763921	0.600755	0.738676	0.776335
-2500	0.878498	0.900289	0.898568	0.883483	0.788191	0.846715	0.835304	0.814577	0.780967	0.880171	0.859385	0.84367	0.896785	0.887724	0.873959	0.874152	0.931384	0.918483	0.930955	0.881491	0.89326	0.856632	0.900652	0.835803	0.892617	0.872337	0.849001	0.910856	0.920294	0.877286	0.795309	0.761823	0.784098	0.810405	0.804428	0.756291	0.575964	0.738112	0.771743
-2400	0.892993	0.902774	0.892462	0.885257	0.787741	0.842265	0.83708	0.819442	0.799852	0.875197	0.874435	0.841629	0.905895	0.889946	0.875804	0.873096	0.931009	0.920258	0.929886	0.879236	0.893287	0.859844	0.899036	0.836042	0.891186	0.875305	0.853453	0.908532	0.920816	0.875467	0.790551	0.760683	0.779395	0.808317	0.795993	0.75313	0.574455	0.744162	0.762162
-2300	0.88907	0.902589	0.892321	0.890763	0.791095	0.851096	0.839032	0.821096	0.792841	0.870004	0.867001	0.842997	0.905203	0.889702	0.880176	0.875058	0.928444	0.920451	0.932048	0.889017	0.895078	0.857755	0.899819	0.838674	0.892803	0.877706	0.857952	0.910269	0.92431	0.875177	0.784159	0.768602	0.785953	0.807953	0.803492	0.759737	0.582595	0.745882	0.75428
-2200	0.877811	0.902133	0.894806	0.893177	0.802604	0.852343	0.840537	0.814416	0.769853	0.866395	0.852298	0.848161	0.903564	0.889149	0.876994	0.877889	0.925089	0.924042	0.934168	0.891037	0.899879	0.855639	0.895085	0.839736	0.891642	0.879783	0.861068	0.913141	0.925204	0.878991	0.78783	0.771755	0.77783	0.79614	0.812573	0.7716	0.58809	0.735605	0.753481
-2100	0.878524	0.897878	0.8918	0.890476	0.793622	0.847699	0.838875	0.805777	0.776613	0.861884	0.858717	0.840418	0.898977	0.887707	0.87475	0.874867	0.921075	0.924582	0.932878	0.884031	0.89859	0.848321	0.889514	0.824511	0.885122	0.881692	0.858461	0.913678	0.92468	0.868081	0.781285	0.754885	0.767264	0.792172	0.801891	0.756521	0.584835	0.724152	0.748502
-2000	0.875764	0.894953	0.892755	0.883856	0.786964	0.841258	0.83136	0.804442	0.751222	0.86769	0.826037	0.834921	0.8998	0.88861	0.873836	0.871243	0.92346	0.920395	0.92688	0.874827	0.895811	0.836081	0.888835	0.821623	0.88364	0.884322	0.85153	0.910227	0.924057	0.863241	0.77275	0.749099	0.768016	0.795769	0.791805	0.741144	0.580979	0.723628	0.745938
-1900	0.870007	0.890419	0.884551	0.877654	0.773252	0.836807	0.821676	0.796589	0.756265	0.862449	0.808035	0.832509	0.888693	0.875842	0.866913	0.862913	0.91742	0.913305	0.920773	0.866966	0.891402	0.832505	0.886853	0.815606	0.879516	0.87013	0.835855	0.9033	0.918083	0.856369	0.761373	0.738678	0.756493	0.7904	0.784124	0.735928	0.565929	0.721167	0.745873
-1800	0.85836	0.886268	0.886204	0.869308	0.771407	0.834803	0.818745	0.790843	0.731168	0.861455	0.812443	0.827645	0.890185	0.876595	0.862888	0.862966	0.914294	0.907102	0.920737	0.863589	0.885917	0.824415	0.88293	0.802043	0.876891	0.870338	0.828869	0.902394	0.918405	0.854907	0.77708	0.73735	0.761824	0.787627	0.789902	0.740657	0.564749	0.722161	0.751983
-1700	0.853555	0.882759	0.883783	0.865532	0.784017	0.845284	0.820222	0.791872	0.729468	0.856106	0.810289	0.827516	0.891757	0.875138	0.859635	0.865305	0.91151	0.908257	0.917856	0.85631	0.876704	0.815804	0.881904	0.798527	0.872128	0.878164	0.831641	0.902055	0.91787	0.866884	0.78592	0.74357	0.766447	0.79625	0.785125	0.74351	0.5788	0.724839	0.747881
-1600	0.858665	0.879605	0.87188	0.861449	0.785543	0.844688	0.821318	0.79328	0.757412	0.853468	0.820521	0.825128	0.888808	0.871012	0.855635	0.864015	0.911266	0.911241	0.915557	0.85318	0.876861	0.82141	0.880065	0.802118	0.865739	0.872782	0.829178	0.903905	0.918123	0.872442	0.771205	0.758961	0.768918	0.793535	0.790498	0.733931	0.585114	0.721786	0.744686
-1500	0.835781	0.875607	0.86285	0.85865	0.76567	0.836902	0.816685	0.792605	0.740118	0.849871	0.814932	0.826115	0.880477	0.86987	0.854204	0.854844	0.906992	0.89842	0.912104	0.855181	0.871137	0.821076	0.878086	0.807882	0.861501	0.86432	0.82493	0.901236	0.915615	0.860163	0.760821	0.742173	0.761156	0.781442	0.781432	0.728282	0.568973	0.716442	0.736104
-1400	0.840537	0.86948	0.863437	0.856157	0.753293	0.820932	0.806062	0.789663	0.747615	0.844581	0.818796	0.814732	0.876101	0.863166	0.844001	0.847314	0.904778	0.891832	0.907417	0.850623	0.865132	0.822554	0.871115	0.805664	0.856853	0.854073	0.822042	0.896255	0.911585	0.847099	0.752329	0.732864	0.749216	0.772065	0.766672	0.728376	0.555135	0.712348	0.725377
-1300	0.851307	0.866497	0.870839	0.859583	0.747938	0.819029	0.807895	0.786051	0.751221	0.848623	0.822547	0.817586	0.878088	0.859536	0.842105	0.853764	0.910484	0.897613	0.908121	0.849917	0.867854	0.81539	0.872499	0.804084	0.863333	0.864313	0.821757	0.895482	0.906195	0.845392	0.750419	0.717468	0.741331	0.770067	0.760955	0.72275	0.550108	0.719153	0.727298
-1200	0.856534	0.874042	0.882146	0.860005	0.755057	0.824347	0.824712	0.800974	0.763399	0.858445	0.837401	0.836301	0.882574	0.865763	0.853707	0.852683	0.907912	0.901734	0.913135	0.862773	0.878688	0.838778	0.878402	0.81432	0.877012	0.870915	0.827301	0.895317	0.898986	0.854686	0.760238	0.723721	0.755643	0.781004	0.786742	0.733925	0.558257	0.717293	0.741283
-1100	0.87319	0.891841	0.891946	0.884545	0.778713	0.844111	0.835039	0.822544	0.786909	0.861257	0.823028	0.848483	0.887443	0.879754	0.866969	0.860669	0.913063	0.905968	0.924444	0.878888	0.888296	0.855812	0.889568	0.835356	0.88531	0.874569	0.844664	0.901031	0.909912	0.87208	0.777131	0.755199	0.778479	0.797345	0.807688	0.758747	0.585043	0.725572	0.746121
-1000	0.87915	0.901095	0.90136	0.89595	0.812829	0.856854	0.845891	0.830076	0.797969	0.868093	0.844625	0.860254	0.890176	0.887934	0.875229	0.869145	0.919604	0.912024	0.929181	0.888755	0.894628	0.86309	0.890754	0.845923	0.88741	0.878376	0.857491	0.90563	0.917306	0.888184	0.796796	0.794675	0.794652	0.813584	0.831569	0.770822	0.607679	0.738424	0.756967
-900	0.871808	0.901147	0.904569	0.894036	0.827003	0.863295	0.855025	0.827795	0.800359	0.873393	0.860347	0.868024	0.891261	0.892124	0.881764	0.869442	0.919875	0.908463	0.928818	0.889803	0.894405	0.864144	0.887927	0.854062	0.889675	0.891872	0.863612	0.905122	0.923026	0.893183	0.808985	0.811909	0.818833	0.832877	0.837279	0.790087	0.620569	0.745199	0.769397
-800	0.888185	0.902082	0.900727	0.889572	0.817254	0.858407	0.852766	0.824377	0.813094	0.87324	0.866669	0.86013	0.891261	0.892424	0.881525	0.862248	0.919814	0.914065	0.92539	0.889206	0.891734	0.854537	0.881886	0.843526	0.893901	0.888381	0.859686	0.904169	0.923644	0.891224	0.811403	0.800726	0.808212	0.845459	0.823449	0.785932	0.617097	0.7407	0.758584
-700	0.873169	0.8925	0.893562	0.886758	0.801154	0.854544	0.849625	0.81835	0.780617	0.866255	0.839523	0.848145	0.887682	0.885941	0.876083	0.856522	0.925358	0.9142	0.922355	0.873947	0.888309	0.842689	0.875264	0.817056	0.890078	0.873627	0.851906	0.903463	0.920361	0.871597	0.812997	0.786696	0.788965	0.830791	0.806543	0.778654	0.592047	0.730849	0.747161
-600	0.866404	0.880593	0.877453	0.871811	0.785272	0.843446	0.841079	0.80896	0.764989	0.857611	0.8313	0.82719	0.881147	0.874814	0.861642	0.845353	0.920694	0.903525	0.914788	0.862896	0.878549	0.823745	0.867526	0.79983	0.879306	0.862631	0.840473	0.889629	0.915576	0.855316	0.799905	0.753945	0.77478	0.804833	0.791989	0.766603	0.573959	0.717191	0.730439
-500	0.806788	0.872459	0.863155	0.85922	0.784216	0.835764	0.827611	0.806355	0.726446	0.854992	0.803998	0.825106	0.864168	0.860809	0.850566	0.813939	0.912257	0.88595	0.91472	0.863285	0.86458	0.82261	0.870588	0.804605	0.873174	0.84367	0.819942	0.870066	0.900378	0.844188	0.775575	0.739704	0.7595	0.781204	0.782456	0.750649	0.563085	0.706792	0.711364
-400	0.804621	0.86047	0.840333	0.841617	0.75886	0.819235	0.800401	0.792864	0.735389	0.854581	0.798901	0.809492	0.842807	0.846168	0.830905	0.778377	0.899928	0.868714	0.906956	0.845563	0.844333	0.80928	0.854357	0.78552	0.862787	0.819007	0.793426	0.850235	0.882964	0.832315	0.743796	0.729169	0.733993	0.75861	0.748435	0.717799	0.529676	0.679501	0.680864
-300	0.788379	0.8547	0.831158	0.832369	0.741556	0.800404	0.783611	0.781641	0.730081	0.855613	0.772983	0.802134	0.840826	0.833472	0.806889	0.76317	0.892344	0.845905	0.906714	0.799637	0.822692	0.772114	0.835143	0.749226	0.861664	0.81652	0.780655	0.843729	0.875492	0.818322	0.718246	0.692134	0.726709	0.737218	0.681217	0.685322	0.499949	0.651818	0.655783
-200	0.852628	0.869724	0.841595	0.852482	0.747537	0.805461	0.785076	0.782857	0.711087	0.859023	0.745941	0.822864	0.874732	0.837032	0.811474	0.783117	0.896621	0.862457	0.915761	0.771266	0.816151	0.739192	0.822691	0.708891	0.864347	0.854779	0.794323	0.856834	0.894358	0.835306	0.725288	0.689437	0.731168	0.729897	0.607826	0.690155	0.515149	0.648005	0.654579
-100	0.873215	0.890042	0.873719	0.886724	0.804382	0.855946	0.816348	0.79753	0.735688	0.855103	0.754461	0.863745	0.912699	0.884466	0.862404	0.853021	0.915882	0.919685	0.92533	0.830538	0.851727	0.778865	0.848002	0.746836	0.869363	0.909785	0.842509	0.893638	0.930418	0.878764	0.812639	0.777842	0.801125	0.800241	0.722163	0.767625	0.550433	0.682016	0.697322
0	0.811152	0.903005	0.910351	0.893875	0.825226	0.860569	0.836048	0.802148	0.697872	0.845739	0.776772	0.847361	0.9365	0.92684	0.908934	0.923832	0.922391	0.942994	0.930125	0.884741	0.886708	0.830804	0.875279	0.819988	0.875979	0.935489	0.871904	0.920216	0.948682	0.920569	0.87292	0.839475	0.849361	0.865116	0.856209	0.841601	0.620099	0.752005	0.788959
100	0.79076	0.917594	0.915476	0.900237	0.848358	0.874938	0.855282	0.844212	0.722973	0.870826	0.789055	0.866752	0.952323	0.947243	0.936952	0.943384	0.922468	0.947616	0.940777	0.935153	0.936697	0.915727	0.926103	0.896749	0.897285	0.932731	0.891966	0.9449	0.947879	0.924513	0.916389	0.880985	0.894885	0.906957	0.909975	0.889808	0.686788	0.75104	0.788332
200	0.868049	0.914195	0.90093	0.896327	0.833279	0.861142	0.852571	0.854594	0.763919	0.883955	0.743265	0.868034	0.947706	0.937449	0.926448	0.93244	0.912259	0.933658	0.938799	0.917177	0.929828	0.908734	0.924676	0.883229	0.90232	0.902714	0.882246	0.94512	0.935644	0.891518	0.890645	0.84292	0.85558	0.877472	0.870373	0.84913	0.640732	0.716653	0.748601
300	0.9104	0.900087	0.879469	0.875021	0.793934	0.839171	0.837897	0.843625	0.760214	0.887819	0.766398	0.844822	0.937508	0.91507	0.901381	0.913447	0.905824	0.913162	0.928103	0.866648	0.908278	0.868454	0.899923	0.835709	0.893605	0.875531	0.85735	0.933162	0.926467	0.864932	0.841244	0.789293	0.805282	0.835153	0.807677	0.780504	0.586921	0.674155	0.697592
400	0.885287	0.876135	0.862652	0.858052	0.759302	0.813516	0.81909	0.81751	0.760609	0.884326	0.786717	0.824776	0.917948	0.892971	0.878632	0.892894	0.90093	0.895822	0.911495	0.840708	0.88208	0.834908	0.877814	0.807003	0.874785	0.853275	0.824057	0.922786	0.919073	0.856948	0.792962	0.743507	0.776063	0.790668	0.769353	0.741126	0.550005	0.645064	0.657669
500	0.845496	0.860405	0.851361	0.850856	0.742636	0.790281	0.806978	0.799543	0.743218	0.873487	0.803622	0.828488	0.89834	0.880802	0.867586	0.873175	0.896911	0.890133	0.900481	0.846946	0.872143	0.831701	0.871434	0.803918	0.853357	0.84117	0.803967	0.915034	0.913814	0.859326	0.771505	0.727656	0.765655	0.763525	0.762686	0.726411	0.525203	0.626121	0.63316
600	0.831566	0.854891	0.845666	0.851076	0.737219	0.790194	0.802949	0.794372	0.736537	0.867761	0.823524	0.836326	0.892805	0.877473	0.863717	0.857739	0.890655	0.876976	0.896681	0.847935	0.864994	0.830914	0.873652	0.814863	0.845356	0.830971	0.800597	0.908464	0.907212	0.856114	0.76121	0.720471	0.757011	0.758722	0.764506	0.714749	0.529775	0.62534	0.628938
700	0.844468	0.847661	0.839264	0.846622	0.739419	0.79123	0.799462	0.795622	0.754466	0.866031	0.821586	0.838283	0.88396	0.877651	0.861604	0.847505	0.888759	0.867765	0.890703	0.846588	0.858255	0.834849	0.872652	0.818598	0.841723	0.823283	0.799346	0.8996	0.909156	0.861862	0.755364	0.73379	0.755262	0.763344	0.767763	0.702176	0.541925	0.636959	0.639594
800	0.823995	0.84485	0.834485	0.844393	0.736466	0.793522	0.795919	0.796026	0.748277	0.866922	0.836794	0.840654	0.874593	0.874152	0.85758	0.841425	0.887076	0.864108	0.885092	0.843498	0.858124	0.832654	0.86855	0.810876	0.837739	0.822226	0.793705	0.894417	0.910038	0.863393	0.744805	0.732719	0.756247	0.77167	0.768904	0.704658	0.55025	0.640391	0.648659
900	0.819867	0.842809	0.832768	0.833926	0.731114	0.790453	0.79182	0.795465	0.768645	0.865914	0.836268	0.833507	0.874994	0.86443	0.852429	0.833113	0.875887	0.849368	0.874703	0.833719	0.855822	0.825022	0.859762	0.80095	0.840718	0.820191	0.789123	0.884968	0.89992	0.84956	0.744336	0.721675	0.743842	0.770115	0.765529	0.701662	0.548326	0.645492	0.649778
1000	0.824221	0.840145	0.830288	0.839956	0.737914	0.796049	0.793167	0.797843	0.777775	0.86347	0.831723	0.832841	0.872415	0.85916	0.854166	0.831176	0.877732	0.849205	0.87063	0.83609	0.856624	0.827208	0.863399	0.798867	0.842016	0.811369	0.786049	0.886568	0.900207	0.8535	0.751595	0.719793	0.740218	0.779825	0.765066	0.706486	0.562068	0.662629	0.652376
1100	0.828814	0.842818	0.829769	0.841023	0.736463	0.789114	0.789257	0.798209	0.769755	0.861957	0.824491	0.831666	0.869365	0.85921	0.850581	0.823556	0.880946	0.85615	0.87692	0.839721	0.854641	0.838361	0.86586	0.802448	0.840003	0.79747	0.786425	0.887391	0.894093	0.851469	0.748365	0.718981	0.745762	0.766017	0.759789	0.70302	0.564158	0.668714	0.654303
1200	0.821208	0.835385	0.821448	0.829668	0.722564	0.77691	0.777995	0.794034	0.765804	0.858074	0.807593	0.827145	0.864197	0.856308	0.843441	0.811789	0.880663	0.850847	0.876574	0.834987	0.851254	0.834292	0.85674	0.796948	0.839526	0.784234	0.781617	0.877864	0.887734	0.847314	0.737022	0.718033	0.728995	0.761426	0.753096	0.699582	0.548124	0.66446	0.661141
1300	0.829036	0.831282	0.81981	0.819334	0.707237	0.777848	0.773334	0.796737	0.766955	0.855002	0.818601	0.829416	0.852484	0.855039	0.839444	0.807164	0.880953	0.843755	0.873991	0.841974	0.853617	0.837373	0.860686	0.809517	0.836468	0.767818	0.771064	0.878602	0.892951	0.852065	0.724809	0.713628	0.724426	0.763416	0.751848	0.693439	0.553528	0.671768	0.674357
1400	0.837817	0.826012	0.811118	0.816707	0.69371	0.764534	0.771632	0.788952	0.76084	0.851622	0.822072	0.819043	0.846663	0.852522	0.838931	0.80559	0.877056	0.834512	0.868681	0.835686	0.84859	0.830232	0.85969	0.812193	0.829554	0.764677	0.764805	0.876169	0.882862	0.851931	0.700307	0.695617	0.721813	0.745166	0.742913	0.67238	0.547498	0.672329	0.677782
1500	0.8163	0.827225	0.811808	0.817394	0.706082	0.759817	0.769205	0.774944	0.748629	0.850924	0.806492	0.818677	0.855767	0.855169	0.839374	0.806633	0.873044	0.834712	0.870434	0.826012	0.843089	0.821105	0.852619	0.795879	0.823713	0.773686	0.760937	0.873492	0.879937	0.841419	0.702462	0.695236	0.728574	0.748293	0.74132	0.675489	0.545705	0.679619	0.680911
1600	0.825152	0.833487	0.823229	0.82714	0.718757	0.773097	0.780427	0.780969	0.749373	0.849254	0.819845	0.823486	0.867165	0.866729	0.850163	0.818044	0.872849	0.84666	0.874545	0.829076	0.84466	0.819756	0.855808	0.794754	0.826116	0.804113	0.769683	0.875527	0.890832	0.845339	0.725523	0.714931	0.732295	0.774362	0.755169	0.700925	0.544205	0.69183	0.698298
1700	0.814942	0.842669	0.828239	0.838889	0.724743	0.78628	0.786608	0.789881	0.720019	0.848392	0.821001	0.82452	0.867214	0.868598	0.849198	0.821995	0.871349	0.853139	0.882956	0.834962	0.854514	0.827465	0.861033	0.798643	0.826183	0.814272	0.782371	0.88087	0.896153	0.854168	0.736175	0.719784	0.742412	0.775116	0.757183	0.72151	0.557835	0.699232	0.712621
1800	0.82081	0.846186	0.825383	0.836346	0.720292	0.784427	0.785199	0.793016	0.759503	0.849676	0.824863	0.828901	0.864244	0.865107	0.846358	0.820747	0.86728	0.847198	0.885343	0.833016	0.855142	0.828919	0.865102	0.799047	0.83292	0.802491	0.784399	0.88478	0.890596	0.854676	0.738445	0.721692	0.737783	0.758663	0.746217	0.71987	0.557384	0.703868	0.714061
1900	0.809086	0.833703	0.820897	0.828675	0.719582	0.776914	0.778287	0.788239	0.743249	0.848166	0.814961	0.825465	0.862449	0.858839	0.839283	0.815622	0.865078	0.843196	0.88036	0.823829	0.851772	0.825748	0.861751	0.801815	0.832451	0.797429	0.77168	0.881515	0.882568	0.849872	0.729426	0.704304	0.721117	0.747198	0.745329	0.706785	0.54712	0.691358	0.70382
2000	0.804941	0.828071	0.815442	0.823952	0.716241	0.774958	0.778449	0.778132	0.727738	0.845102	0.792625	0.822259	0.868108	0.854974	0.844233	0.80923	0.869572	0.843064	0.871946	0.81871	0.84402	0.818108	0.855725	0.792936	0.830205	0.802914	0.763707	0.875883	0.888147	0.845919	0.721307	0.698264	0.720674	0.737762	0.748729	0.703854	0.542077	0.681471	0.702946
2100	0.80374	0.824517	0.812326	0.821781	0.708559	0.780546	0.777195	0.775333	0.716721	0.842836	0.801499	0.819462	0.868358	0.855313	0.851821	0.810759	0.872325	0.840731	0.865298	0.809048	0.84075	0.808038	0.848236	0.778291	0.824677	0.804626	0.76746	0.873753	0.891344	0.843605	0.731657	0.706423	0.724777	0.740342	0.738041	0.692475	0.538406	0.685568	0.705815
2200	0.795303	0.824156	0.8217	0.82104	0.722085	0.787752	0.778299	0.773875	0.706416	0.841208	0.787049	0.818997	0.874304	0.853493	0.852584	0.811394	0.873072	0.837555	0.868633	0.816256	0.838626	0.802382	0.845655	0.768393	0.822734	0.813974	0.771704	0.873254	0.888349	0.835999	0.734752	0.705052	0.725028	0.741427	0.742806	0.689069	0.557719	0.697168	0.714412
2300	0.808413	0.823947	0.823516	0.812795	0.711639	0.778464	0.776546	0.765797	0.724787	0.836916	0.805474	0.798278	0.87147	0.848308	0.838768	0.812655	0.873799	0.840826	0.869108	0.818863	0.829528	0.798735	0.842717	0.76417	0.817593	0.814632	0.767896	0.875263	0.883265	0.827153	0.723723	0.678662	0.717701	0.73261	0.727839	0.675711	0.538216	0.696792	0.718508
2400	0.792519	0.816704	0.819282	0.804905	0.69588	0.771027	0.77617	0.763671	0.709775	0.832884	0.80386	0.79942	0.861564	0.851617	0.837498	0.818611	0.871768	0.841794	0.866849	0.81584	0.830441	0.797381	0.837523	0.765048	0.814096	0.804534	0.764724	0.878266	0.890369	0.828196	0.716767	0.678108	0.708699	0.737899	0.73194	0.671289	0.534302	0.697805	0.724838
2500	0.775831	0.812661	0.818241	0.806009	0.690786	0.765722	0.777814	0.760447	0.690175	0.831848	0.766482	0.799797	0.859956	0.85338	0.837831	0.814225	0.869626	0.837178	0.867206	0.81351	0.825147	0.789399	0.828517	0.759021	0.812655	0.79608	0.763569	0.879327	0.893094	0.826846	0.709395	0.670351	0.713012	0.736398	0.721772	0.665068	0.532419	0.687314	0.722823
2600	0.794747	0.814877	0.814006	0.812717	0.706111	0.768292	0.776594	0.762637	0.691228	0.832185	0.77286	0.805522	0.864268	0.855775	0.838763	0.817135	0.868358	0.840889	0.869412	0.817353	0.831881	0.792908	0.828638	0.759543	0.807533	0.804683	0.768072	0.880461	0.894473	0.837073	0.718319	0.686471	0.714621	0.749391	0.72498	0.669652	0.538488	0.691655	0.720488
2700	0.811174	0.826261	0.815474	0.823198	0.721713	0.777505	0.783284	0.767049	0.705964	0.837776	0.784756	0.816727	0.873222	0.858227	0.838482	0.820773	0.870595	0.8408	0.872464	0.812402	0.837524	0.806808	0.838885	0.77113	0.803064	0.8111	0.775898	0.880583	0.894004	0.835003	0.731587	0.714094	0.724204	0.758258	0.738795	0.689881	0.55571	0.701695	0.724055
2800	0.781552	0.824746	0.815687	0.817447	0.710142	0.778322	0.782162	0.772876	0.699281	0.839571	0.758358	0.812459	0.873388	0.857992	0.839295	0.808172	0.861622	0.831474	0.866784	0.811483	0.837389	0.811675	0.842439	0.769286	0.802659	0.804396	0.775184	0.873886	0.885899	0.825475	0.726677	0.704402	0.719243	0.747343	0.744996	0.688901	0.553822	0.701468	0.723471
2900	0.778517	0.813794	0.806589	0.809512	0.701999	0.778859	0.769643	0.760957	0.700891	0.834105	0.748222	0.805744	0.866022	0.846232	0.837518	0.800957	0.848738	0.82112	0.857849	0.802537	0.826748	0.804744	0.833976	0.760437	0.795035	0.790729	0.764849	0.867423	0.882674	0.822892	0.71817	0.686216	0.716703	0.738825	0.72741	0.672747	0.543321	0.6858	0.714482
3000	0.782114	0.796771	0.790194	0.791122	0.692846	0.75828	0.758665	0.749275	0.692429	0.822968	0.772021	0.795262	0.857037	0.835537	0.828655	0.79497	0.848192	0.81199	0.848251	0.790834	0.820309	0.788594	0.823899	0.748166	0.788785	0.788561	0.748049	0.862393	0.870841	0.808772	0.704423	0.656159	0.683225	0.719605	0.704157	0.66496	0.530895	0.667042	0.696904
3100	0.790145	0.784019	0.783793	0.784144	0.690615	0.756903	0.754928	0.74422	0.694244	0.815066	0.752658	0.789072	0.852285	0.831599	0.8216	0.795142	0.848587	0.81405	0.840115	0.781136	0.812182	0.770399	0.812253	0.741899	0.778614	0.785375	0.741991	0.859548	0.865823	0.806843	0.707622	0.664998	0.682956	0.711922	0.713444	0.664408	0.526546	0.662561	0.689559
3200	0.765236	0.789951	0.790199	0.79696	0.705788	0.773997	0.76658	0.740597	0.679323	0.815733	0.746698	0.803471	0.859926	0.842625	0.824305	0.801235	0.851143	0.820651	0.839509	0.78907	0.809696	0.775704	0.814699	0.749253	0.778092	0.787409	0.74937	0.861633	0.871609	0.819598	0.716338	0.692576	0.704528	0.718326	0.731014	0.676436	0.538355	0.673341	0.694393
3300	0.758231	0.796201	0.793893	0.797149	0.705966	0.757403	0.766238	0.746424	0.693794	0.816081	0.770784	0.790675	0.856139	0.838372	0.82564	0.800301	0.849702	0.820464	0.843748	0.789302	0.811789	0.782602	0.820109	0.749808	0.778711	0.783113	0.752807	0.862602	0.87453	0.81827	0.706694	0.681979	0.71284	0.712775	0.716497	0.668977	0.535988	0.677096	0.694883
3400	0.776384	0.801019	0.798259	0.793303	0.702304	0.759254	0.767608	0.75349	0.705356	0.81844	0.786257	0.780589	0.861262	0.845288	0.828363	0.805224	0.847988	0.818459	0.853602	0.785282	0.810815	0.781721	0.821797	0.749539	0.7823	0.801358	0.759135	0.864745	0.877163	0.821589	0.711111	0.687032	0.71264	0.73086	0.720567	0.669613	0.537702	0.686795	0.706957
3500	0.787158	0.802461	0.797691	0.788655	0.709118	0.769497	0.765108	0.752317	0.692456	0.814984	0.783153	0.787357	0.861131	0.845061	0.824521	0.808406	0.846229	0.820504	0.858529	0.776303	0.807335	0.78183	0.815712	0.74538	0.78225	0.810543	0.755184	0.862975	0.876577	0.812927	0.726301	0.679822	0.711219	0.732974	0.734352	0.672036	0.542637	0.68641	0.71481
3600	0.779963	0.806992	0.802674	0.791854	0.718751	0.772913	0.761669	0.759043	0.698803	0.816398	0.766455	0.796128	0.864928	0.850699	0.830781	0.81501	0.840471	0.830197	0.85449	0.779042	0.811791	0.776884	0.813083	0.744401	0.787884	0.80874	0.767291	0.864116	0.871638	0.810099	0.735737	0.680842	0.698006	0.733795	0.729798	0.679403	0.557494	0.691609	0.72502
3700	0.764079	0.80983	0.802064	0.79468	0.730432	0.786106	0.769608	0.757193	0.677003	0.817914	0.759009	0.80221	0.87438	0.856286	0.837542	0.820242	0.845452	0.837995	0.852113	0.786006	0.816183	0.760519	0.807344	0.737808	0.791848	0.811959	0.77681	0.868407	0.883789	0.81814	0.747387	0.69153	0.702228	0.748907	0.73161	0.703959	0.585506	0.704175	0.729757
3800	0.776892	0.811533	0.803925	0.79438	0.730286	0.783709	0.77496	0.754654	0.688752	0.819651	0.757966	0.798901	0.872932	0.855738	0.84366	0.81776	0.84619	0.837775	0.8483	0.79831	0.811713	0.759007	0.809824	0.743687	0.791222	0.816607	0.779731	0.868383	0.891419	0.825113	0.753616	0.697098	0.709092	0.752372	0.731411	0.702273	0.589658	0.706787	0.720907
3900	0.782352	0.805001	0.800833	0.790666	0.72186	0.771395	0.770687	0.753884	0.707264	0.819255	0.784712	0.791041	0.866425	0.848974	0.840331	0.813635	0.843395	0.837343	0.843289	0.806567	0.801511	0.766661	0.80821	0.745366	0.787388	0.807543	0.768398	0.864709	0.88454	0.826774	0.737037	0.699459	0.714093	0.746634	0.733484	0.698425	0.575808	0.697516	0.712173
4000	0.789119	0.804541	0.798232	0.793296	0.71786	0.769462	0.765249	0.765152	0.715859	0.8247	0.803877	0.80004	0.862574	0.845197	0.83519	0.809293	0.845049	0.838583	0.848423	0.810394	0.813528	0.780706	0.817457	0.75728	0.792603	0.802897	0.757808	0.860554	0.884543	0.829031	0.71413	0.69557	0.714263	0.741075	0.733363	0.695995	0.561754	0.690903	0.711331
4100	0.791598	0.805992	0.795022	0.796355	0.711185	0.7691	0.766143	0.775118	0.714028	0.825405	0.792641	0.810943	0.861218	0.850915	0.834138	0.80461	0.842638	0.832376	0.849867	0.814579	0.818673	0.794481	0.825559	0.768967	0.79696	0.794513	0.75195	0.859464	0.878185	0.828624	0.703386	0.688592	0.717143	0.733028	0.731094	0.688812	0.551999	0.690913	0.708594
4200	0.796519	0.806214	0.796356	0.803013	0.715518	0.761214	0.765643	0.781802	0.742017	0.824724	0.799293	0.818261	0.864251	0.847	0.836534	0.802912	0.851339	0.827856	0.855119	0.808665	0.814575	0.796971	0.827529	0.765998	0.803539	0.786182	0.752481	0.858243	0.876704	0.837106	0.711846	0.685267	0.72797	0.735962	0.735674	0.691068	0.553469	0.697091	0.710202
4300	0.784552	0.806219	0.795494	0.800005	0.714276	0.757988	0.762105	0.78084	0.729134	0.823372	0.804382	0.81266	0.861337	0.848448	0.833595	0.798758	0.847114	0.819232	0.852415	0.800181	0.819116	0.79214	0.826326	0.764842	0.801719	0.781288	0.756888	0.856095	0.870813	0.835639	0.710781	0.684055	0.715903	0.738886	0.738041	0.679155	0.54781	0.699752	0.717984
4400	0.777073	0.795034	0.796182	0.787855	0.70135	0.752211	0.760767	0.767662	0.727307	0.822761	0.792616	0.791152	0.856174	0.845917	0.832325	0.79242	0.84209	0.808369	0.847412	0.800913	0.816008	0.783456	0.82233	0.763826	0.799528	0.784279	0.755149	0.852618	0.865275	0.821898	0.709639	0.671476	0.721322	0.732373	0.733591	0.670549	0.552091	0.691497	0.718559
4500	0.785755	0.790955	0.794618	0.792519	0.699729	0.758633	0.762493	0.753239	0.723437	0.815114	0.769202	0.795633	0.857148	0.842496	0.833949	0.796645	0.835634	0.814991	0.83891	0.797854	0.817488	0.785344	0.820998	0.766475	0.791034	0.788575	0.748623	0.851909	0.87143	0.822948	0.714267	0.686945	0.714663	0.737154	0.730457	0.679281	0.55643	0.689432	0.718564
4600	0.789234	0.797212	0.794572	0.797098	0.709715	0.749935	0.761519	0.749953	0.723646	0.817038	0.784512	0.795185	0.857546	0.838734	0.827622	0.800898	0.831892	0.823044	0.843359	0.79279	0.812801	0.78391	0.813874	0.757218	0.786708	0.790255	0.75013	0.853014	0.874624	0.826473	0.711633	0.692467	0.708493	0.730112	0.73187	0.672538	0.549451	0.683512	0.708693
4700	0.800976	0.793584	0.788213	0.795697	0.704077	0.743541	0.760849	0.749448	0.719433	0.817949	0.778842	0.795124	0.856022	0.837223	0.82471	0.798794	0.829159	0.819933	0.837429	0.792443	0.803058	0.779437	0.803172	0.747244	0.779788	0.782654	0.757718	0.85227	0.870432	0.821454	0.7021	0.688797	0.707848	0.729621	0.727219	0.671843	0.543948	0.673456	0.703376
4800	0.790236	0.787234	0.786441	0.78799	0.700414	0.744715	0.754336	0.754437	0.715063	0.818031	0.770786	0.799376	0.849041	0.833901	0.830626	0.796652	0.837185	0.819044	0.833638	0.793285	0.804999	0.783496	0.802062	0.747404	0.776773	0.78009	0.753636	0.84945	0.871175	0.823266	0.709607	0.697345	0.717004	0.733996	0.728995	0.682685	0.550713	0.680235	0.713636
4900	0.765513	0.775292	0.771349	0.771742	0.68907	0.726367	0.734097	0.737366	0.686761	0.803693	0.751222	0.791551	0.831768	0.821736	0.815651	0.778558	0.831735	0.806818	0.822138	0.780993	0.803225	0.769108	0.800482	0.743297	0.767474	0.770207	0.735589	0.842923	0.852052	0.812769	0.687295	0.666485	0.701802	0.713751	0.71002	0.667427	0.538057	0.671133	0.702785

## Sheet: Change in fork dir 93 tDNAs
rrm3_AA_1	rrm3_AA_2	rrm3_AA_2.1	rpc25_rrm3_1	rpc25_rrm3_2	rpc25_rrm3_3	rpc25_rpc82_rrm3_1	rpc25_rpc82_rrm3_2	rpc25_rpc82_rrm3_3	bdp1_rrm3_1	bdp1_rrm3_2	bdp1_rrm3_3	anchor_away_1	anchor_away_2	anchor_away_3	rrm3KO_1	rrm3KO_2	rrm3KO_3	TLS_rrm3_1	TLS_rrm3_2	TLS_rrm3_3	rad18_rrm3_1	rad18_rrm3_2	rad18_rrm3_3	brn1_rrm3_1	brn1_rrm3_2	brn1_rrm3_2techrep	KO_wt_bkg_1	KO_wt_bkg_2	KO_wt_bkg_3	top1_rrm3_1	top1_rrm3_2	top1_rrm3_3	top2_rrm3_1	top2_rrm3_2	top2_rrm3_3	top1_top2_rrm3_1	top1_top2_rrm3_2	top1_top2_rrm3_3
0.215902	0.0794423	0.0615268	-0.0745058	0.0499273	-0.0373569	-0.0403922	-0.0322436	0.0182237	-0.0647399	-0.0517505	-0.0406098	-0.185057	-0.101098	-0.144765	0.213002	0.135474	0.34314	0.0965261	0.103398	0.0631794	0.0747159	0.0237711	0.137546	0.00888842	-0.0516539	0.10009	0.0232841	-0.0714354	0.116247	0.0722673	0.0944216	0.0711825	0.0233448	0.0622754	0.127004	0.195426	0.134141	0.116942
0.196631	0.0997496	0.11377	0.0827218	0.138295	0.0794969	0.0908535	0.0565843	0.135748	0.035605	0.219984	0.0766686	0.126079	0.0929252	0.0829725	0.117387	0.0385635	0.15696	0.0914307	0.0981973	0.0489931	0.0440871	0.0628091	0.0619872	0.0579792	0.144079	0.0976187	0.0546424	0.129552	0.0922827	0.114191	0.167602	0.0589495	0.118054	0.10316	0.122647	0.103186	0.0648618	0.0921003
0.059463	0.0148882	0.0331675	0.00716521	0.0167136	-0.00388927	-0.0156964	-0.00308714	-0.0133088	-0.011999	0.0336893	0.0134247	0.0190161	0.00303888	0.0107368	0.0243463	0.00225917	0.0198486	0.0063228	0.00790911	-0.0253435	-0.0328438	-0.0038744	-0.0117878	0.00969374	0.0248132	0.0133598	-0.00316513	-0.00361475	-0.0114168	0.0337171	0.0384494	-0.00963867	0.0198638	0.000317709	0.0233786	0.00422966	-0.0559665	-0.0483411
-0.0174632	0.0596755	0.113582	0.0279547	0.0638888	0.0913647	0.122753	-0.0344439	-0.17536	0.0072613	-0.129914	-0.0522723	0.177132	0.112637	0.124053	0.0988988	0.109988	0.0990645	0.0717009	0.0236989	0.0853381	-0.031431	0.0639522	-0.0319091	0.0693623	0.227722	0.104406	0.0617064	0.0071721	-0.0855777	0.0841399	0.00398228	0.0210243	0.0480962	-0.0139485	0.0147537	-0.0755637	0.0165995	0.0646568
0.136798	0.0873015	0.0699568	0.0771655	0.0864988	0.0428094	0.0770817	0.0475524	0.0995143	0.0540165	0.0987469	0.0374029	0.0688585	0.0498923	0.0472401	0.0606026	0.0664728	0.119151	0.08097	0.134435	0.0994868	0.119635	0.110589	0.160114	0.0817171	0.0682958	0.144713	0.0727458	0.0468252	0.0964984	0.0697153	0.0584995	0.0802769	0.126644	0.12598	0.101902	0.124193	0.217804	0.228335
0.107127	0.0316488	-0.0298854	-0.0293085	-0.024566	-0.0507679	-0.0126164	-0.0392855	0.0560729	-0.0475385	0.0583833	-0.0907795	-0.122335	-0.0842323	-0.0536537	0.045787	-0.00898864	0.0645902	-0.00326278	0.0518904	0.0340213	0.0448271	-0.00895247	0.063877	0.0409482	-0.0496395	0.0221351	0.0083727	0.00483491	0.0500015	-0.0277563	0.0256869	-0.00560089	-0.0571864	-0.00146631	0.0554548	-0.0048323	0.0064404	-0.0189034
0.0765975	0.140921	0.218724	0.0489606	0.211349	0.137837	0.100447	-0.0114617	-0.0896269	0.0335546	-0.0169244	-0.0135337	0.166814	0.132159	0.101937	0.105252	0.0912461	0.0563219	0.0820524	0.020194	0.0265558	-0.0350942	0.0281696	-0.038467	0.0833044	0.0698399	-0.0244468	0.0542489	0.0366702	-0.00517983	0.129735	0.0854311	0.0621372	0.164959	0.0951013	0.111842	0.0108784	0.035624	0.12762
0.0119451	0.0842326	0.0677304	0.0603622	0.0075789	0.0700973	0.0624032	0.0980758	0.0668786	0.0299923	0.0640603	0.0230899	-0.0259564	-0.00843538	-0.0242057	0.0218122	0.0553713	0.0083804	0.059444	0.0507186	0.084754	0.0773608	0.0852194	0.0836977	0.0839557	0.087364	0.100782	-0.0163275	-0.0226935	0.0158278	0.0344301	0.0599469	0.0685234	0.123037	0.0780391	0.096368	0.0265613	0.00647186	-0.0496341
0.345862	0.311574	0.302993	0.22274	0.211075	0.148568	0.168602	0.133806	0.190484	0.166327	0.142807	0.0905902	0.101128	0.145145	0.143321	0.244327	0.302721	0.299241	0.34789	0.333306	0.317512	0.288188	0.293953	0.267829	0.29528	0.216625	0.301699	0.193186	0.198677	0.138409	0.202279	0.256252	0.198772	0.228064	0.240914	0.237441	0.0571927	0.152322	0.182825
-0.022082	0.00676896	-0.00137705	-0.00592549	-0.00919672	-0.0098292	0.0054287	-0.0244698	-0.0300429	-0.031342	0.042287	-0.0168905	0.00058452	-0.0131506	-0.0177123	-0.0024971	0.00262466	0.0193053	-0.00196358	-0.00536654	0.00186118	-0.0398399	-0.0160441	-0.0340842	-0.00995736	0.0139023	0.0224442	-0.00198557	-0.00731111	-0.0148391	-0.0255251	-0.0585382	-0.0575139	-0.0460598	-0.0155476	-0.0549158	-0.0731242	-0.053493	-0.0560386
0.169769	0.157761	0.0635018	0.0390164	0.0467146	0.079785	0.0410385	0.0400169	0.0998673	-0.00504078	0.129658	0.0263037	-0.0456145	0.013363	0.0342721	0.0342857	0.162337	0.114833	0.108826	0.103249	0.140216	0.220433	0.137198	0.0826199	0.158021	-0.0401441	0.13032	0.062623	0.0329116	0.0563135	0.0344271	0.0814142	0.0391491	0.106246	0.10407	0.00699539	0.0052411	0.0368662	0.000406138
-0.00984542	0.000888691	-0.000910678	-0.0115943	-0.0903551	-0.0256851	-0.0243837	-0.0473274	-0.00188385	-0.0162104	0.00658702	-0.0238854	0.00311848	-0.0223593	-0.0263625	-0.0329905	-0.00844838	-0.0139712	-0.00186652	-0.011662	-0.00868037	0.0204739	0.0051333	-0.00989664	0.000400906	-0.0140402	-0.0484625	-0.00881523	-0.00767679	-0.00786004	-0.112092	-0.0849225	-0.0639524	-0.0505818	-0.0353124	-0.0867298	-0.092919	-0.0296591	-0.011014
0.189323	0.0963778	0.0309849	0.0591172	-0.0405409	-0.0352495	-0.0293154	0.0548137	0.105537	-0.0160085	0.0522289	-0.0536759	-0.0179672	0.0187215	-0.00256785	0.00504512	0.0358463	0.0889724	0.0442793	0.207142	0.158661	0.145183	0.17806	0.209236	0.129737	-0.129619	0.055923	0.0250421	0.0203977	0.0300966	-0.0398749	0.0250471	0.060945	0.0156347	0.115097	-0.0057354	0.0175047	-0.00662722	-0.0530376
0.0878603	0.0473002	0.0618571	0.0204433	-0.00448556	0.0202355	0.0288319	-0.0295231	0.032654	-0.00246267	0.0448388	0.0116661	0.00887934	0.00281959	0.0130501	0.00138353	-0.0181742	0.0256025	0.0229088	-0.00449291	0.0248331	0.0249627	0.0151532	0.0211739	0.0495654	0.0216516	0.0525354	0.0153647	0.0130695	0.00456628	0.000195289	0.0438367	0.002199	0.0272266	0.0144253	0.00159716	0.0499707	0.0913675	0.0625641
0.0225849	0.0173624	0.00940827	-0.0142476	-0.0407123	-0.0251996	-0.0489155	0.0136787	0.0239034	0.00307777	0.0689943	-0.0101338	0.00187832	0.0094159	-0.00456173	-0.0442227	-0.00685187	-0.00786987	0.0165342	0.00403138	0.0276306	-0.00126945	0.0208588	0.0186594	0.00770699	-0.0110518	-0.0295707	-0.00157744	-0.00687277	-0.0154431	-0.0741828	-0.109269	-0.0655794	-0.0709624	-0.0520897	-0.0837766	-0.0936179	-0.0405516	-0.0237421
0.114129	0.103218	0.125124	0.133176	0.122763	0.134596	0.0905557	0.0128275	0.0550004	0.0178959	0.00121439	0.0134547	0.0049229	0.0231888	0.0200827	0.0574923	0.0349331	0.080378	0.0598127	0.00318716	0.0667197	0.02886	0.0477588	0.0236938	0.112478	0.112427	0.125917	0.0317498	0.0314873	-0.00805927	0.139599	0.0974233	0.128679	0.0948089	0.110261	0.131568	0.0880779	0.0925922	-0.00418921
0.0283235	0.0414197	0.0384232	0.0398943	0.0909668	0.069221	0.0354671	0.0520922	-0.0426255	0.0120153	-0.0373575	0.0115146	0.0206061	0.00679915	0.00829332	0.0438894	-0.00995746	0.0386608	0.038636	0.0138151	-0.00638717	0.00120916	0.0224105	0.037042	0.0481144	0.0783149	0.0673924	0.0156958	0.0204836	0.00438393	0.052493	0.0298679	0.0268513	0.0636917	0.0165876	0.0688676	0.00899952	0.0933596	0.194618
0.0138487	0.0136218	-0.020769	-0.00870163	-0.013531	0.0433354	-0.0171331	0.0322347	0.144103	-0.00151227	0.0981818	-0.0514207	-0.00283903	-0.0200409	0.0113216	-0.0700222	-0.0188672	-0.0116703	-0.0042518	0.017134	0.0249821	0.0359021	0.00490464	0.0512041	0.0222031	-0.0362428	-0.0269878	-0.0255263	-0.0395614	-0.0317349	-0.0202124	0.0404904	-0.0177006	-0.0579493	-0.0199121	-0.0327452	0.00739443	0.028725	-0.025874
0.138261	0.126741	0.104691	0.168513	0.149217	0.142368	0.0864016	0.0521209	0.0850483	0.0258591	0.0978972	0.0674441	0.0653414	0.0163673	-0.00802788	0.0467007	0.0284843	0.0930301	0.0947864	-0.0084229	0.0366203	0.0362594	0.0561008	0.0260396	0.109699	0.0567497	0.0514618	0.00922555	0.033297	0.0343697	0.0701762	0.0815249	0.0877865	0.0907785	0.0532692	0.0593674	0.0292388	0.012222	0.0305054
-0.0576199	-0.0198628	0.0161544	-0.0465616	-0.134232	-0.0690569	-0.0329314	-0.0271637	-0.0583295	-0.0330532	-0.040325	-0.0619316	-0.0469515	-0.0130054	-0.0352182	-0.141132	-0.0197168	-0.0804809	-0.0177469	-0.0520149	-0.0150889	-0.074476	-0.00906284	-0.020662	0.0255421	-0.141052	-0.102315	-0.0278565	-0.0210337	-0.172963	-0.0905143	-0.124279	-0.0780529	-0.111008	-0.0264159	-0.140836	-0.194879	-0.133199	-0.109892
0.106724	0.0114911	-0.00948032	-0.0275956	-0.0122821	-0.0109575	-0.0124398	-0.0125119	0.0216735	-0.0366096	0.00195865	0.00129606	-0.0271413	-0.0220915	-0.0444971	-0.027351	0.0240921	0.0537586	0.0351132	0.0766731	0.050187	0.0482185	0.0140654	0.0420754	0.0460901	-0.00340747	-0.0095485	-0.0392922	-0.034807	-0.0217	-0.0343357	0.0446149	0.0520039	0.00311329	0.0443457	0.0409255	-0.0407851	-0.061239	-0.0811113
0.243311	0.237848	0.237583	0.187764	0.24637	0.225	0.188612	0.164494	0.10092	0.0910375	0.0871217	0.118533	0.165682	0.14566	0.123155	0.187033	0.189067	0.249953	0.19588	0.150337	0.130768	0.121166	0.0978483	0.133711	0.209552	0.249896	0.285988	0.107477	0.107548	0.136215	0.221261	0.177196	0.194467	0.202997	0.142003	0.187158	0.104551	0.209788	0.233415
0.00514434	0.0441114	0.0781015	0.0722395	0.0373803	0.0694107	0.0561536	0.104846	0.0930328	0.0449093	0.0812791	0.0182038	0.00340478	0.00918641	0.0246273	-0.00854499	0.0375465	0.00936292	0.0423581	0.0502291	0.0469785	0.0517598	0.0710582	0.0535026	0.1069	0.0214789	0.0301146	0.00148119	-0.003308	-0.0205236	-0.0119935	0.022209	-0.00323176	0.0087747	0.0369068	-0.00200343	-0.0383533	0.00752212	0.00808818
-0.00668032	0.00617574	-0.0345528	-0.0220393	-0.114495	-0.0539993	-0.0615677	-0.0286811	-0.00736143	-0.00487684	0.0420245	-0.077041	-0.0363379	-0.0429277	-0.0308118	-0.0520921	-0.0044019	-0.0146123	-8.39037e-05	0.0085911	0.00458154	-0.00124175	0.032238	0.0233155	0.0237137	-0.0556911	-0.0550734	-0.00918131	-0.0251035	-0.0446902	-0.14274	-0.127803	-0.0981856	-0.0893057	-0.0970693	-0.158193	-0.243042	-0.108204	-0.0755385
0.0786263	0.0546868	0.0568554	0.0226743	0.00731955	0.00166048	-0.00132718	-0.00611829	-0.01848	-0.0167189	0.0285974	-0.0180545	0.0148046	0.024429	0.0206392	-0.0204569	0.00531148	0.104113	0.0213715	0.0138639	0.00509247	-0.0373406	0.00198495	0.0166435	0.0738901	0.107968	0.0608408	-0.0141375	-0.00333819	-0.0235314	-0.0290733	-0.0363221	-0.00878167	0.0148995	-0.0235074	-0.00189233	-0.0280452	-0.0353439	0.00659252
0.584666	0.456857	0.488328	0.262749	0.372963	0.305439	0.255324	0.122154	0.176397	0.138836	0.0738988	0.169367	0.15164	0.154479	0.137639	0.520165	0.395765	0.654788	0.410208	0.413883	0.353743	0.23586	0.234944	0.32291	0.29765	0.42223	0.517999	0.196082	0.193338	0.259294	0.385623	0.381908	0.413484	0.380173	0.376748	0.399557	0.346024	0.413673	0.380262
0.0896914	0.0427153	0.0209455	0.0258137	0.0681003	0.0387297	0.0300311	0.038825	0.0716264	0.0461051	-0.0174817	0.0241548	-0.0028059	0.0157439	0.0248319	0.0276291	0.0325639	0.0356994	0.030063	0.083046	0.0943682	0.0786392	0.088548	0.0784969	0.0588648	-0.00965023	0.035007	0.0245691	0.0100433	0.0450441	0.0610028	0.0474524	0.0771043	0.0457102	0.0554256	0.115285	0.0744101	0.0359097	0.0246928
0.12826	0.157366	0.174489	0.209216	0.226102	0.241826	0.257951	0.230521	0.238483	0.0964906	0.10177	0.149215	0.115631	0.113639	0.130411	0.137096	0.112452	0.125704	0.129378	0.120251	0.106323	0.115372	0.0918621	0.131415	0.142476	0.197228	0.174257	0.0937513	0.0633394	0.0881879	0.192027	0.193895	0.200792	0.152612	0.147998	0.208425	0.187728	0.193512	0.189913
0.198371	0.220526	0.228603	0.203751	0.203588	0.222706	0.153653	0.0508562	0.124338	0.0479203	0.111003	0.0916431	-0.0007733	0.0126986	-0.039158	0.176412	0.126298	0.213361	0.194598	0.120884	0.166031	0.112729	0.102711	0.116545	0.189998	0.194924	0.224335	0.0221283	0.0507409	0.0918602	0.14747	0.155311	0.134428	0.200735	0.190217	0.112053	0.0154597	-0.0168293	-0.0697273
0.0532902	0.0416182	0.11069	0.119541	0.183679	0.14725	0.150167	0.0968176	0.0449449	0.0668876	0.0236705	0.0848021	0.163198	0.101925	0.0935868	0.0787499	0.044945	0.0867744	0.0497286	0.00506357	0.0363676	-0.0131035	-0.0133868	0.02327	0.0394493	0.250047	0.138974	0.0594817	0.0834818	0.109852	0.198825	0.132002	0.154082	0.0721343	0.101394	0.1397	0.152955	0.143973	0.172963
0.116465	0.173454	0.232924	0.129192	0.110143	0.168317	0.13361	0.062278	-0.0327708	0.0251767	-0.0490583	0.00219594	0.0473208	0.0255967	0.0174897	0.050355	0.175493	0.181031	0.192943	0.144122	0.189841	0.116022	0.1523	0.0661484	0.212013	0.195409	0.141607	0.000705187	-0.00370719	-0.00218315	0.137187	0.130997	0.156548	0.132055	0.123774	0.161035	-0.0164133	-0.00962434	-0.0048984
-0.273888	-0.0606936	-0.0721725	-0.0810487	-0.110593	-0.0576555	-0.059933	-0.124204	-0.220893	-0.0541035	-0.0981598	-0.0963369	-0.0282062	-0.00879133	-0.0186435	-0.0851653	-0.0496668	-0.101463	-0.0273535	-0.0936241	-0.0356819	-0.112647	-0.0496662	-0.100991	-0.0575109	0.0104836	-0.144554	-0.0246704	-0.029353	-0.226094	-0.131249	-0.120689	-0.0912034	-0.0965983	-0.0731262	-0.15154	-0.0535806	-0.0994445	-0.078024
0.164054	0.160795	0.163672	0.127431	0.0765938	0.105454	0.110995	0.10681	0.120489	0.0654028	0.0935658	0.0810573	0.0135382	0.00254376	0.0289649	0.0613776	0.15423	0.175581	0.182227	0.132092	0.100299	0.123688	0.136676	0.196004	0.155547	0.0684848	0.132496	0.0163767	0.028726	0.0625724	0.0850012	0.136595	0.161372	0.18577	0.119109	0.0980661	0.0306143	0.0558154	0.0560132
0.147018	0.16369	0.168991	0.12408	0.103619	0.0924016	0.118756	0.112007	0.0859627	0.0577868	0.109308	0.0672115	0.0539519	0.0251543	0.0344255	0.0699236	0.136716	0.159562	0.192287	0.122101	0.103333	0.119566	0.134455	0.185578	0.141632	0.12163	0.132329	0.0178958	0.0309617	0.0401817	0.0850121	0.117421	0.133147	0.177929	0.106766	0.118512	0.0456344	0.0971467	0.0801982
0.106332	0.0596413	0.0652143	0.00164234	0.0445168	0.0451214	0.0290734	0.0165767	0.123822	-0.0701517	0.144439	0.0366064	0.0104797	0.00185532	0.00824951	0.0283351	0.0937445	0.149603	0.0262816	0.0497363	0.0181182	0.0208834	-0.0225283	-0.0255979	0.128371	0.1039	0.10288	-0.0158736	0.00751761	0.070676	0.0128568	0.0658356	0.0801397	-0.0335703	0.0531624	0.0159006	0.0350216	0.00613889	-0.0529078
0.219537	0.29257	0.300831	0.283401	0.312903	0.280137	0.236861	0.191491	0.162184	0.155774	0.0744229	0.185894	0.224157	0.210707	0.215175	0.178755	0.296992	0.232197	0.282628	0.277778	0.305695	0.205623	0.234478	0.180287	0.27179	0.383748	0.272272	0.161116	0.209691	0.168835	0.248446	0.238729	0.224029	0.259741	0.227817	0.254181	0.0973436	0.125443	0.161486
0.0537583	0.0165299	0.0204098	0.0272368	0.0254688	0.0361502	0.00644957	0.021463	0.0911795	0.00853168	0.0623279	0.0353203	0.0267301	0.00794396	0.00728202	0.0187303	0.00172121	0.0238296	0.00785151	0.042253	0.0232688	0.0316841	0.00952506	0.0315755	0.021264	0.0277834	0.0145786	0.01817	0.00883233	0.053472	0.0356728	0.0579449	0.0328409	0.0520486	0.0402533	0.0529384	0.0439309	0.0161779	0.0245672
0.0614676	0.0623824	0.0367136	0.0421102	0.100415	0.0662897	0.0684863	0.0662821	0.105757	0.052962	0.132097	0.0390639	0.0419054	0.0159509	0.0272781	0.0943822	0.0229054	0.0693589	0.0349608	0.0835208	0.0381958	0.0511862	0.0419041	0.0954425	0.0533229	0.0518962	0.0869976	0.0436784	0.0287043	0.100558	0.0164117	0.071263	0.0799047	0.0846476	0.0548504	0.0917866	0.124246	0.133931	0.086523
0.449819	0.426998	0.381369	0.344897	0.390677	0.38655	0.339748	0.296847	0.240774	0.291166	0.208408	0.123303	0.208397	0.269175	0.220347	0.320358	0.426669	0.503862	0.521871	0.438408	0.468384	0.37356	0.417185	0.422999	0.362614	0.388358	0.331117	0.207186	0.201593	0.224607	0.409905	0.32029	0.334581	0.384305	0.377267	0.345139	0.243171	0.292791	0.312529
0.0129012	0.0519197	0.0785164	0.0703013	0.192099	0.126247	0.0888891	0.0179668	-0.0278586	-0.00632778	-0.0783319	0.014349	0.016729	0.014971	0.0128102	0.0666678	0.00791959	0.04381	0.0209193	-0.00806733	0.00546174	-0.0300222	-0.0118147	0.00101099	0.0286605	0.23256	0.135267	0.0248367	0.0235205	0.0158773	0.153733	0.0970612	0.0995101	0.100222	0.0418823	0.181994	0.145557	0.00594988	-0.00536131
0.1055	0.0568138	0.0699766	0.0967975	0.0256044	0.0823935	0.0516619	0.0689592	0.147195	0.0431759	0.161512	0.0270675	0.040252	0.0472719	0.0067733	0.0361625	0.0308582	0.0380925	0.0237437	0.0829937	0.0380049	0.129154	0.0695517	0.0924902	0.0503778	0.00719306	0.0510996	0.014937	0.0581826	0.118214	0.0134648	0.09881	0.0322618	0.0435755	0.0880206	0.0486511	0.0211229	0.0743797	0.108411
0.128845	0.0893324	0.0948951	0.0601752	0.137458	0.0832635	0.0680854	0.0315596	0.0726925	0.0315615	0.0840046	0.0710586	0.0188184	0.0455558	0.0208691	0.102618	0.0696312	0.137831	0.0694797	0.149074	0.100577	0.0844912	0.0786316	0.0991822	0.065566	0.0906665	0.158321	0.047371	0.0416181	0.0610561	0.122696	0.167441	0.114846	0.0796157	0.12596	0.175945	0.26018	0.191144	0.138544
0.0673309	0.0663505	0.0819624	0.0652442	0.110497	0.0466912	0.0661089	0.04852	0.0653561	0.0573192	0.104383	0.0512202	0.0392725	0.0127371	0.022467	0.070428	0.0126649	0.0835366	0.0392383	0.0735006	0.0556292	0.0848649	0.0634707	0.0763869	0.0721546	0.0841801	0.122291	0.0302691	0.0231433	0.0383974	0.0477864	0.0274633	0.0493141	0.0608237	0.0590435	0.0859314	0.091875	0.0689143	0.0606006
0.0235464	0.0491097	0.00560144	0.010896	0.0137684	0.00241954	0.00605396	-0.0153758	0.00734346	-0.00242709	0.0686823	0.0296098	0.00813312	0.00882684	0.00576847	0.0273352	-0.0109914	0.00540811	0.024258	0.0288741	0.0185029	0.00599144	0.0236528	0.0107777	0.0321193	0.00617867	0.0122448	0.00874901	0.00212043	-0.0139385	-0.0229607	-0.00127709	-0.0480997	-0.0286255	-0.00178084	-0.0118068	-0.0723686	0.0394175	0.0118675
-0.0182971	0.0477207	0.0847813	0.00086932	0.0273891	0.0829676	0.0405485	-0.0618666	-0.14272	-0.0563797	-0.205223	-0.028013	0.0411635	0.0101075	0.0818822	0.0305037	0.0451383	0.0856393	0.0476271	-0.00662773	0.0277359	-8.85396e-05	-0.00813302	-0.0423556	-0.00933842	0.198713	0.0516659	0.0206823	0.0659055	-0.0839379	0.026819	-0.0335569	-0.000525938	-0.0352805	0.00411289	0.00732499	-0.0344564	-0.0884089	-0.0149956
0.117242	0.0581981	0.0402468	-0.0127688	0.0282033	0.0412846	0.00689342	0.00524405	-0.0461858	-0.0170521	0.0127092	-0.0199953	0.0168381	-0.00686189	0.00453086	0.0458609	0.0527163	0.1106	0.0898354	0.0748294	0.0599357	0.0747977	0.0706601	0.068049	0.0436502	0.0480041	0.0445754	-0.00440165	0.0184628	0.0776839	0.0607933	0.0620103	0.0574693	0.0388782	0.0311562	0.0698176	0.116417	0.078741	0.0463382
0.0352355	0.0667989	0.0629567	0.0510325	0.0347256	0.0152241	0.0434963	0.000308364	0.0154637	0.0218539	0.0488143	-0.0122909	-0.00649826	0.0200432	0.027161	0.00386891	0.0568703	0.0605925	0.0503277	0.0309717	0.0331109	0.0408129	0.049164	0.0181142	0.110402	0.0329873	0.022732	0.00488292	0.0109968	-0.0389348	0.0081992	-0.000887374	-0.0114747	0.00323907	-0.0123864	0.01612	-0.0679412	-0.0457006	0.0441436
0.0431956	0.0411548	0.0590169	0.0369852	0.0435144	0.0363122	0.0335992	-0.0176593	-0.0072826	-0.0181616	-0.00262926	0.0249195	0.0312053	0.0101036	0.00724532	0.0679362	0.0305916	0.0743402	0.0482404	0.014096	0.0201262	-0.0322839	0.0144385	0.0045185	0.0400498	0.101174	0.0825889	0.0309102	0.0252304	0.0182432	0.079331	0.0318959	0.0427387	0.0693389	0.0562714	0.0517637	0.0733632	0.101932	0.123628
0.164363	0.158989	0.168033	0.155563	0.316627	0.227213	0.181382	0.137093	0.184593	0.0845017	0.103539	0.110055	0.0679802	0.0975991	0.089859	0.145814	0.0572085	0.113002	0.106253	0.107315	0.0724059	0.109266	0.0715084	0.150714	0.172583	0.14162	0.211173	0.0914084	0.0726069	0.121717	0.294811	0.298425	0.260935	0.252555	0.267423	0.296764	0.362613	0.34552	0.302745
-0.0106749	0.00963627	0.00986167	-0.00418085	0.055314	0.0183532	0.0242512	-0.0260011	-0.0316534	-0.00829374	-0.00302717	-0.0167956	0.0221353	0.0168169	0.00629324	0.00589191	0.00117918	0.01415	-0.00539315	-0.0134831	-0.0147913	-0.0367679	-0.00252041	-0.0333961	-0.00393137	0.0464722	0.0558582	0.0046449	-0.000896067	-0.00751766	0.0454139	0.0135765	0.0208669	0.0186185	0.0221205	0.034847	0.061391	0.0428373	0.0658105
-0.35788	-0.432471	-0.388781	-0.297101	-0.175799	-0.1364	-0.172296	-0.233287	-0.0562104	-0.286028	-0.0779574	-0.160006	-0.435447	-0.42769	-0.412023	0.0786976	-0.0298164	0.0190798	-0.459223	-0.403291	-0.43653	-0.379266	-0.440882	-0.38621	-0.427654	-0.31467	-0.318391	0.0271391	-0.0238417	0.0198636	-0.297813	-0.276853	-0.306775	-0.343879	-0.311069	-0.264349	-0.0522183	-0.272964	-0.320615
0.0440662	0.00775651	0.0276282	0.0429291	0.0735212	0.0262	0.0180439	0.0664242	0.171273	0.0171474	0.0724398	0.0473286	-0.00778776	0.00983999	0.00100609	0.0228294	0.020654	0.0241999	0.0168516	0.0350753	0.0388647	0.0444784	0.0217134	0.0379764	0.0250724	-0.0608273	0.0375507	0.00427381	0.0120601	0.0700087	0.000481697	0.0837345	0.0208551	0.0155127	0.0277408	0.0669561	0.0657907	0.0569998	0.0317248
0.327569	0.298509	0.263554	0.282816	0.313428	0.306328	0.25938	0.120862	0.205512	0.223697	0.0453614	0.166791	0.266437	0.276727	0.268302	0.226354	0.290624	0.293254	0.29986	0.220819	0.218834	0.199185	0.179854	0.232725	0.25937	0.307019	0.333543	0.216709	0.299175	0.325609	0.356427	0.254968	0.288205	0.301399	0.26738	0.310104	0.212775	0.263973	0.261003
0.0892888	0.0756417	0.0969599	0.0929192	0.142568	0.105006	0.029598	0.0065374	-0.0285049	-0.00904558	0.0512733	-0.0200258	0.0401572	0.0268874	0.0209068	0.0472466	0.0706871	0.133764	0.0590656	0.03483	0.0372197	-0.0147114	0.0135868	-0.00813437	0.0607828	0.209823	0.165621	0.0196546	0.0183844	-0.0218667	0.0541397	0.0114938	-0.00181012	0.00698677	0.0351593	0.0570334	0.0213885	0.0114091	0.0550322
0.261451	0.29067	0.325445	0.28705	0.395151	0.296549	0.220872	0.163142	0.190445	0.0654418	0.0756855	0.119327	0.107576	0.0696592	0.0674768	0.185793	0.192943	0.338315	0.197133	0.120831	0.12453	0.0636566	0.0382775	0.0668027	0.230189	0.448862	0.452731	0.0562136	0.0538224	0.0768008	0.224111	0.27251	0.197711	0.235275	0.175211	0.321562	0.151233	0.123132	0.0975726
0.117009	0.0970102	0.0608766	0.0693049	0.0290327	0.0999124	0.0469887	0.0441678	0.102257	0.0298044	0.0476183	0.011465	0.0369531	0.0357163	0.0094689	0.0654695	0.0322689	0.0655114	0.0299026	0.0666114	0.051551	0.0382847	0.0404625	0.0325376	0.0812716	0.0729329	0.10104	0.025753	0.00214948	0.0603179	0.0817745	0.104864	0.0765603	0.0889362	0.0842896	0.10244	0.0668932	0.0214818	0.0443766
0.026058	0.0224417	0.0331225	0.0267886	0.0903959	0.0564832	0.0540753	0.0155414	0.0692787	0.0323498	-0.0350013	0.0379292	0.0213623	0.050025	0.00961709	0.0573111	0.00677266	0.0335965	-0.0249137	0.0154457	-0.0153744	-0.00658609	-0.0340851	-0.00871211	0.025086	0.0353695	0.118672	0.0126085	0.0115844	0.0797329	0.0842865	0.0923033	0.076616	0.0458713	0.0676024	0.152365	0.133909	0.100586	0.051645
0.0116263	0.0271657	0.014906	0.0136619	0.0373676	0.0279081	0.017173	0.0159771	0.0176641	0.00752663	0.0312049	0.011697	0.00951307	-0.00314012	0.0355745	0.0084308	0.00357373	0.0109415	0.0133732	0.0165507	0.00578409	-0.00371221	0.00568886	0.0261357	0.0428854	0.0107061	0.0363254	0.00937784	-0.0135359	0.00431808	0.00487259	0.0756636	0.0397001	0.0183754	0.033353	0.0422092	-0.0155116	0.0291106	0.0377483
0.045928	0.0313334	0.0493926	0.0164982	0.00820346	0.0125363	-0.00547846	0.0525069	0.0787147	0.00975136	0.120823	0.0282823	0.0343457	0.0192215	0.0202723	0.00230611	0.0305775	0.0191772	0.012602	0.0175621	0.0338333	0.00131846	0.0301478	0.0181235	0.0321915	0.0498572	0.0381572	0.000580327	0.00494605	0.00324608	0.000895088	-7.87667e-05	0.011932	-0.0284539	0.0340298	-0.00798247	-0.0758799	-0.0201004	0.0171363
0.0115456	0.018884	0.0271028	0.0122522	0.0339734	-0.00552941	-0.00369768	-0.00554127	-0.0258507	-0.00191802	-0.00663828	-0.00311359	0.0274843	0.00182796	-0.0154928	0.0346936	0.013478	0.0255267	0.0265211	0.0154056	0.0251442	-0.00875957	0.0210141	0.0223349	0.0135826	0.0382088	0.0225583	0.00844595	0.00669861	-0.0112407	-0.014259	-0.0218159	-0.0235279	-0.0474474	-0.0212344	0.0155488	-0.020912	0.0279001	0.0201859
0.0285943	0.000922155	0.034769	0.0107675	0.0225876	0.0961456	0.0459298	-0.0461453	-0.106677	-0.00063558	-0.0122237	-0.024699	0.0485829	0.0262435	0.034985	0.137121	0.0434777	0.0830578	0.0366359	0.0283263	0.0339026	-0.0350939	-0.00750785	-0.0164583	0.0132076	0.16775	0.063733	0.0725274	0.0566636	-0.0247757	0.0396565	-0.0858457	-0.0161247	0.0134285	0.0163713	-0.0162266	0.0172603	0.0570508	0.157389
-0.0964561	-0.100701	-0.0964968	-0.113587	-0.256821	-0.176605	-0.164488	-0.112362	-0.188893	-0.0592237	-0.0301594	-0.157218	-0.157035	-0.114211	-0.121692	-0.163943	-0.0719703	-0.111553	-0.0593706	-0.0103553	-0.0297735	-0.0748553	-0.0235406	-0.0896928	0.0114119	-0.154076	-0.191362	-0.0420175	-0.103666	-0.176885	-0.199805	-0.207631	-0.163784	-0.193706	-0.134331	-0.162024	-0.261037	-0.251827	-0.199251
0.223944	0.153108	0.196323	0.162981	0.217184	0.184951	0.179598	0.0734426	0.0576212	0.0798496	0.0225705	0.102056	0.134854	0.11434	0.0451752	0.141586	0.131415	0.139665	0.137574	0.0867758	0.106672	0.0229499	0.0398691	0.100524	0.158639	0.230866	0.221538	0.108156	0.0670763	0.125211	0.22695	0.185421	0.163181	0.16012	0.145951	0.200895	0.139037	0.166377	0.143481
0.0935847	0.134446	0.143651	0.0843137	0.119697	0.0820963	0.0832708	0.051074	0.0820555	0.086145	0.190205	0.0380961	0.0836331	0.0192274	0.0832615	0.0817918	0.0737184	0.0729788	0.116302	0.129405	0.104333	0.0878241	0.101821	0.0942504	0.141237	0.112417	0.0255105	0.0478499	0.0422498	0.0166989	0.0760241	0.0339138	0.0951489	0.0605066	0.146429	0.0451753	0.0140354	0.0699569	0.0693374
0.0485349	0.089797	0.0647147	0.0726009	0.0443761	0.105296	0.0797138	0.0676769	0.0683213	0.0987314	0.0463096	-0.00663103	0.0176799	0.0262147	-0.00868411	0.0244036	0.0358082	0.0850176	0.0594804	0.0192761	0.0281192	0.0333954	0.0251818	-0.00698407	0.0763515	0.128206	0.121874	0.014131	0.0169093	-0.0151238	0.024276	0.0501292	-0.0191462	0.0496691	0.0176011	0.0659858	0.00305212	0.0264087	0.0275256
0.141779	0.186196	0.14001	-0.0180639	-0.096945	-0.0623139	-0.0683679	0.0413399	-0.0909867	0.0491157	-0.0161313	-0.0767134	-0.0505453	-0.0289504	0.0361005	0.0477986	0.230325	0.166256	0.20615	0.309921	0.352219	0.281726	0.360315	0.298919	0.235818	-0.0654288	0.0218914	-0.00271183	-0.0412209	-0.0527324	-0.0960218	-0.061474	0.0224071	-0.0356553	0.0574751	-0.0282688	-0.184056	-0.0502959	-0.0311906
0.0304322	0.0538206	0.0883644	0.0373338	0.0646078	0.0484766	0.0499952	-0.0182141	-0.0758518	-0.0417214	-0.0173515	-0.00901371	0.0540597	0.0412124	0.0487798	-0.0658719	0.0258905	0.0457674	0.0208663	-0.0232526	-0.00381697	-0.0288409	0.00769433	-0.047636	0.0463226	0.095049	0.0304316	-0.0142278	-0.0111783	0.000212625	0.0684744	0.0486951	0.0265522	0.0190586	0.0203101	0.0433836	0.0465081	0.0202072	0.0464667
0.137838	0.0816866	0.114607	0.116701	0.172681	0.173211	0.127691	0.0727271	0.149414	0.0523542	0.157229	0.0552333	0.0697102	0.0659601	0.0695948	0.108829	0.0403891	0.190673	0.0816108	0.0439624	0.0898197	0.0534092	0.0823357	0.047557	0.113757	0.148532	0.145004	0.135733	0.0713164	0.0784881	0.138446	0.146319	0.0604317	0.158732	0.109215	0.148809	0.0133222	0.0325349	-0.000655622
-0.0367897	0.0334816	0.062216	0.0605778	0.0566397	0.0449347	0.0024504	0.0167393	-0.0785549	0.0266225	-0.0477085	-0.0126416	0.0453099	0.0287832	0.0352243	-0.00220785	0.0383522	-0.0208932	0.0586787	0.0274739	0.0710192	-0.0167769	0.0599968	0.0212453	0.0591398	0.0727332	0.0368814	-0.0240038	0.0358642	-0.0683617	0.0381679	-0.0273668	0.0180997	0.0326547	0.0242067	-0.00785346	-0.0598543	-0.0598921	-0.0506304
0.278889	0.249889	0.143455	0.225875	0.139013	0.197424	0.153571	0.218433	0.256471	0.131342	0.196252	0.128042	0.0520715	0.0379487	0.0450914	0.228417	0.292836	0.250288	0.245614	0.271158	0.24045	0.306603	0.264734	0.258458	0.226903	0.0979259	0.186781	0.0734442	0.0663174	0.129027	0.135582	0.233472	0.155826	0.198842	0.206036	0.231347	0.133357	0.127945	0.087934
0.28589	0.258631	0.271255	0.276902	0.224754	0.197933	0.167011	0.184651	0.205656	0.102082	0.153727	0.114107	0.0870444	0.0999183	0.0458395	0.134471	0.243063	0.243307	0.207713	0.167142	0.108925	0.12209	0.125172	0.116991	0.230481	0.142351	0.225601	0.0481224	0.0919013	0.188723	0.185647	0.218348	0.218297	0.247633	0.216356	0.188881	0.0871952	0.141006	0.144498
0.244275	0.19117	0.189332	0.126781	0.160956	0.140541	0.134716	0.0738322	0.0612802	0.145863	0.0712249	0.0668933	0.118505	0.159153	0.141491	0.120865	0.174981	0.232735	0.202104	0.202141	0.223038	0.10878	0.143632	0.160317	0.121668	0.166971	0.177225	0.151153	0.130203	0.127404	0.234815	0.227326	0.213841	0.108831	0.114594	0.190803	0.161028	0.223082	0.180737
-0.000765595	0.0544959	0.0804131	0.0266249	0.0939374	0.135811	0.0680887	-0.069333	-0.0985457	-0.00314491	-0.122498	0.0198637	0.0956941	0.0640482	0.0982131	0.0848359	0.0316185	0.0866585	0.0891142	-0.00117805	0.0480309	-0.0347331	0.0136936	-0.0339181	-0.0326629	0.238212	0.0480599	0.0954362	0.0444324	-0.0679662	0.110165	0.0238479	0.0738651	0.109847	0.0327286	0.0768787	0.000378273	0.065143	0.0669657
0.326755	0.247008	0.199985	0.187336	0.162268	0.158815	0.142443	0.140217	0.244787	0.0867753	0.182273	0.148777	0.0882663	0.148292	0.0417974	0.169234	0.112422	0.258458	0.20635	0.20595	0.178362	0.204086	0.177417	0.185228	0.210063	0.114632	0.25415	0.130162	0.156107	0.213258	0.172904	0.182828	0.182282	0.185239	0.188364	0.206999	0.110474	0.0716394	0.0833498
0.186126	0.141869	0.120005	0.169326	0.0742844	0.0751321	0.0804648	0.102833	0.227558	0.124375	0.0906731	0.0698747	-0.0155441	0.0454286	0.0937152	0.0551201	0.113964	0.0967683	0.0825483	0.168612	0.108991	0.0497595	0.100516	0.175629	0.175687	0.00743906	0.122809	0.0345617	-0.00748688	0.0466218	0.102613	0.109302	0.11896	0.0885903	0.0983317	0.105611	0.0570493	0.0649182	0.0932283
0.0197057	0.0402746	0.0598726	0.02953	0.125937	0.0913967	0.10801	-0.0107951	-0.0152672	0.0224853	-0.0242083	0.0278709	0.0519799	0.0502119	0.0532475	0.0614705	0.0178737	0.0680675	0.042029	-0.0117219	-0.00802904	-0.0420718	-0.00843927	-0.0478969	0.0182042	0.197515	0.0764105	0.0302493	0.037031	-0.0130714	0.121691	0.0760188	0.0518722	0.0456484	0.0893347	0.0895575	0.0919647	0.0514867	0.0675988
0.361731	0.248481	0.222989	0.147111	0.235212	0.197304	0.155994	0.119242	0.146596	0.107631	0.0797988	0.103564	0.134901	0.104219	0.0957059	0.256704	0.144916	0.357902	0.233803	0.298548	0.277158	0.241	0.212652	0.268376	0.176539	0.270373	0.304362	0.142868	0.119087	0.164079	0.160127	0.230127	0.218161	0.181466	0.183167	0.300075	0.254538	0.217656	0.237531
0.00960854	-0.0014786	0.0150587	-0.012418	0.14124	0.0439184	0.0222154	-0.0399936	-0.0574926	-0.0790386	-0.0699073	0.0334455	0.0401419	0.0144172	-0.0110217	0.100879	4.98277e-05	0.0314044	-0.00869708	-0.02799	-0.0465043	-0.0771609	-0.0751829	-0.0771513	-0.0202222	0.113762	0.0543535	-0.0354847	0.0261091	0.0649708	0.0586439	0.0935043	0.0392363	0.0462919	0.029952	0.0843866	0.177282	0.074763	0.0728461
0.0455412	0.0908637	0.131101	0.0750326	0.0850679	0.104874	0.0708904	-0.0343449	-0.0974604	0.0307148	-0.0896734	0.0498581	0.108861	0.0599424	0.0518651	0.130527	0.0659117	0.100908	0.0724585	0.0463452	0.0485245	-0.0361613	0.0272358	-0.0169145	0.0328272	0.258878	0.135938	0.0519677	0.0454534	-0.0060837	0.097173	0.0565722	0.00717619	0.0864422	0.059003	0.108784	-0.00986031	0.0709558	0.0990411
0.167644	0.153684	0.160835	0.214698	0.214983	0.129482	0.184982	0.213723	0.216411	0.0926342	0.0564739	0.100329	0.110827	0.119808	0.119324	0.0980346	0.0689616	0.135633	0.072383	0.128165	0.0953667	0.0905163	0.0501654	0.143061	0.168471	0.122966	0.19317	0.0809658	0.0559093	0.134448	0.169563	0.217322	0.174769	0.124073	0.136643	0.221835	0.194662	0.15649	0.177947
0.376234	0.349996	0.339676	0.295203	0.327426	0.261516	0.252438	0.187215	0.179757	0.184529	0.146934	0.195942	0.223016	0.226236	0.181045	0.290877	0.357691	0.399157	0.367768	0.332013	0.297195	0.270804	0.226111	0.259358	0.232174	0.369095	0.40885	0.210414	0.25317	0.328053	0.3012	0.3224	0.24542	0.304661	0.250191	0.283848	0.212861	0.224185	0.232617
0.0467855	0.045891	0.0364002	0.00297741	0.00777635	0.0116995	0.00192731	-0.00734726	-0.0112958	0.00979745	-0.0188315	-0.0265241	0.0524114	0.0259621	0.0136232	0.0149144	0.00547516	0.04721	0.0280099	0.0379039	0.0150956	-0.00861029	0.0101491	-0.00896888	0.0327161	0.0783687	0.0303403	0.0197747	0.01265	-0.0297042	0.0260283	0.0334959	0.00961852	0.0189863	-0.0149948	0.0501784	0.0213963	0.0285653	0.0472229
-0.0896838	0.0110712	0.0458851	0.0491178	0.212239	0.111568	0.0743771	0.0399248	0.0115147	-0.0256765	0.0340455	0.0477654	0.0323896	-0.00821388	-0.000298959	0.021404	-0.0200089	-0.0437543	0.00184041	-0.0318977	-0.024165	-0.0483059	-0.0720058	-0.0741154	-0.0123233	0.0837979	0.0794712	-0.0559337	-0.00589136	0.00360364	0.0981414	0.0777948	0.0519559	0.0258919	0.0252657	0.0843913	0.0982259	0.00911516	-0.0102487
0.120039	0.0342949	0.0409677	0.078474	0.10977	0.115358	0.0305993	0.0398298	0.0335264	0.0576856	0.0271439	0.0219902	-0.0192927	-0.0124107	0.00601823	0.101326	0.0767698	0.134751	0.171295	0.170183	0.128707	0.139059	0.137837	0.168777	0.0347288	0.0378108	0.12568	0.0940857	0.0701032	0.124233	0.0598933	0.108716	0.0687044	0.0917011	0.0493842	0.108904	0.010759	0.0959748	0.100067
0.120591	0.0603889	0.0742274	0.0786981	0.192114	0.084799	0.0924476	0.0514211	0.12457	0.0313944	0.0751348	0.0770688	0.0308379	0.0511037	0.0626985	0.110855	0.0206186	0.0673594	0.0298852	0.0500085	0.0215215	0.0257591	0.0111559	0.0584817	0.0435351	0.110663	0.141549	0.049601	0.0448816	0.118167	0.12882	0.159805	0.165432	0.135979	0.0914484	0.187425	0.20266	0.165022	0.177472
0.0490077	0.0780318	0.126685	0.108994	0.318147	0.238383	0.234081	0.0933172	0.17022	-0.00833914	0.174474	0.136893	0.0815845	0.0661168	0.047555	0.0803494	0.0180343	0.100013	0.00784189	0.0357127	-0.00969011	0.0134043	-0.038926	0.0226761	0.0882975	0.193973	0.208062	0.0236983	0.0202439	0.0390165	0.181799	0.12179	0.153081	0.131352	0.147294	0.188017	0.111994	0.0147883	0.0485197
0.140153	0.176698	0.174074	0.112054	0.095893	0.113533	0.111021	0.059361	0.0415361	0.073249	0.0709371	0.03848	0.0915589	0.0603081	0.0747148	0.108985	0.256111	0.147439	0.192134	0.132456	0.136123	0.120417	0.0877005	0.0685823	0.202013	0.192514	0.0848782	0.0659769	0.0720962	0.00740055	0.11566	0.072001	0.0908625	0.101627	0.139634	0.0865153	0.0257753	0.0664561	0.0503634
0.196945	0.133155	0.161705	0.117729	0.23569	0.208686	0.144535	0.0462488	0.0337088	0.0664575	0.0623132	0.122544	0.108976	0.139443	0.121726	0.218133	0.102313	0.221956	0.0894735	0.09282	0.078409	-0.0179068	0.0191418	0.0627387	0.0771047	0.254663	0.26639	0.1167	0.0894464	0.172163	0.246041	0.187924	0.191675	0.149494	0.157362	0.229808	0.238823	0.315443	0.300086
0.155786	0.219999	0.242829	0.211904	0.127812	0.138976	0.163542	0.164623	0.156991	0.0887806	0.0965982	0.0500409	0.0930206	0.0583091	0.104569	0.0770529	0.216904	0.140776	0.239177	0.223113	0.203595	0.205005	0.245093	0.194077	0.242697	0.152077	0.174793	0.0444476	0.077439	0.0694207	0.12524	0.10919	0.112867	0.187041	0.200907	0.149894	-0.0223183	0.0103625	0.0271136
0.0561468	0.0704439	0.0833526	0.0466903	0.00197966	0.0605541	0.0408186	0.0447987	0.0548166	0.0400441	0.0622012	0.023804	0.0360407	0.0416609	0.0880157	0.053549	0.0699162	0.109969	0.0340493	0.0523016	0.0411679	0.0538022	0.0490435	0.0364258	0.0795909	0.103478	0.0629172	0.0330976	0.0260549	0.0461273	0.0677209	0.0545184	0.0818942	0.0446315	0.0273914	0.0213683	-0.0198558	0.0833236	0.1103
0.242313	0.140282	0.163925	0.113029	0.0924166	0.0634598	0.0975369	0.0255838	0.102313	0.0719658	0.0561302	0.0860662	0.0846434	0.120619	0.0651522	0.112409	0.128657	0.232058	0.144302	0.158307	0.133228	0.15026	0.118042	0.190461	0.0752834	0.151207	0.177106	0.119354	0.106453	0.165805	0.110768	0.0883985	0.0797109	0.121298	0.181043	0.120091	0.110715	0.172987	0.139676
0.169684	0.187244	0.117575	0.115802	0.0661361	0.0853777	0.0860091	0.126893	0.156822	0.058201	0.125502	0.0449619	0.042069	0.0561791	0.0447981	0.0945903	0.123167	0.155575	0.128717	0.149032	0.193733	0.163286	0.179501	0.156952	0.22757	0.0685183	0.103422	0.0605129	0.0337107	0.0623402	0.0886419	0.123026	0.17399	0.098955	0.140768	0.13238	0.0102366	0.0536663	0.100682
-0.00771207	-0.0180253	-0.0290576	0.00108638	0.0215667	-0.00484248	0.0142138	0.0170263	-0.00203828	0.00311552	-0.0465799	-0.0172572	-0.0440139	-0.0133568	-0.031777	-0.0145742	-0.0400417	-0.0108223	-0.0063297	-0.00824662	-0.0150648	-0.0421389	0.0204354	-0.00591442	-0.0470864	-0.0157991	0.0139592	-0.0092006	-0.0109675	-0.00775583	0.00794225	0.028599	0.00422395	0.037726	0.0205627	0.0288061	0.0355932	0.0313485	0.0302282

## Sheet: Change in fork dir HO tDNAs
rrm3_AA_1	rrm3_AA_2	rrm3_AA_2.1	rpc25_rrm3_1	rpc25_rrm3_2	rpc25_rrm3_3	rpc25_rpc82_rrm3_1	rpc25_rpc82_rrm3_2	rpc25_rpc82_rrm3_3	bdp1_rrm3_1	bdp1_rrm3_2	bdp1_rrm3_3	anchor_away_1	anchor_away_2	anchor_away_3	rrm3KO_1	rrm3KO_2	rrm3KO_3	TLS_rrm3_1	TLS_rrm3_2	TLS_rrm3_3	rad18_rrm3_1	rad18_rrm3_2	rad18_rrm3_3	brn1_rrm3_1	brn1_rrm3_2	brn1_rrm3_2techrep	KO_wt_bkg_1	KO_wt_bkg_2	KO_wt_bkg_3	top1_rrm3_1	top1_rrm3_2	top1_rrm3_3	top2_rrm3_1	top2_rrm3_2	top2_rrm3_3	top1_top2_rrm3_1	top1_top2_rrm3_2	top1_top2_rrm3_3
0.215902	0.0794423	0.0615268	-0.0745058	0.0499273	-0.0373569	-0.0403922	-0.0322436	0.0182237	-0.0647399	-0.0517505	-0.0406098	-0.185057	-0.101098	-0.144765	0.213002	0.135474	0.34314	0.0965261	0.103398	0.0631794	0.0747159	0.0237711	0.137546	0.00888842	-0.0516539	0.10009	0.0232841	-0.0714354	0.116247	0.0722673	0.0944216	0.0711825	0.0233448	0.0622754	0.127004	0.195426	0.134141	0.116942
0.059463	0.0148882	0.0331675	0.00716521	0.0167136	-0.00388927	-0.0156964	-0.00308714	-0.0133088	-0.011999	0.0336893	0.0134247	0.0190161	0.00303888	0.0107368	0.0243463	0.00225917	0.0198486	0.0063228	0.00790911	-0.0253435	-0.0328438	-0.0038744	-0.0117878	0.00969374	0.0248132	0.0133598	-0.00316513	-0.00361475	-0.0114168	0.0337171	0.0384494	-0.00963867	0.0198638	0.000317709	0.0233786	0.00422966	-0.0559665	-0.0483411
0.136798	0.0873015	0.0699568	0.0771655	0.0864988	0.0428094	0.0770817	0.0475524	0.0995143	0.0540165	0.0987469	0.0374029	0.0688585	0.0498923	0.0472401	0.0606026	0.0664728	0.119151	0.08097	0.134435	0.0994868	0.119635	0.110589	0.160114	0.0817171	0.0682958	0.144713	0.0727458	0.0468252	0.0964984	0.0697153	0.0584995	0.0802769	0.126644	0.12598	0.101902	0.124193	0.217804	0.228335
0.0765975	0.140921	0.218724	0.0489606	0.211349	0.137837	0.100447	-0.0114617	-0.0896269	0.0335546	-0.0169244	-0.0135337	0.166814	0.132159	0.101937	0.105252	0.0912461	0.0563219	0.0820524	0.020194	0.0265558	-0.0350942	0.0281696	-0.038467	0.0833044	0.0698399	-0.0244468	0.0542489	0.0366702	-0.00517983	0.129735	0.0854311	0.0621372	0.164959	0.0951013	0.111842	0.0108784	0.035624	0.12762
0.345862	0.311574	0.302993	0.22274	0.211075	0.148568	0.168602	0.133806	0.190484	0.166327	0.142807	0.0905902	0.101128	0.145145	0.143321	0.244327	0.302721	0.299241	0.34789	0.333306	0.317512	0.288188	0.293953	0.267829	0.29528	0.216625	0.301699	0.193186	0.198677	0.138409	0.202279	0.256252	0.198772	0.228064	0.240914	0.237441	0.0571927	0.152322	0.182825
0.169769	0.157761	0.0635018	0.0390164	0.0467146	0.079785	0.0410385	0.0400169	0.0998673	-0.00504078	0.129658	0.0263037	-0.0456145	0.013363	0.0342721	0.0342857	0.162337	0.114833	0.108826	0.103249	0.140216	0.220433	0.137198	0.0826199	0.158021	-0.0401441	0.13032	0.062623	0.0329116	0.0563135	0.0344271	0.0814142	0.0391491	0.106246	0.10407	0.00699539	0.0052411	0.0368662	0.000406138
0.0878603	0.0473002	0.0618571	0.0204433	-0.00448556	0.0202355	0.0288319	-0.0295231	0.032654	-0.00246267	0.0448388	0.0116661	0.00887934	0.00281959	0.0130501	0.00138353	-0.0181742	0.0256025	0.0229088	-0.00449291	0.0248331	0.0249627	0.0151532	0.0211739	0.0495654	0.0216516	0.0525354	0.0153647	0.0130695	0.00456628	0.000195289	0.0438367	0.002199	0.0272266	0.0144253	0.00159716	0.0499707	0.0913675	0.0625641
0.0138487	0.0136218	-0.020769	-0.00870163	-0.013531	0.0433354	-0.0171331	0.0322347	0.144103	-0.00151227	0.0981818	-0.0514207	-0.00283903	-0.0200409	0.0113216	-0.0700222	-0.0188672	-0.0116703	-0.0042518	0.017134	0.0249821	0.0359021	0.00490464	0.0512041	0.0222031	-0.0362428	-0.0269878	-0.0255263	-0.0395614	-0.0317349	-0.0202124	0.0404904	-0.0177006	-0.0579493	-0.0199121	-0.0327452	0.00739443	0.028725	-0.025874
0.106724	0.0114911	-0.00948032	-0.0275956	-0.0122821	-0.0109575	-0.0124398	-0.0125119	0.0216735	-0.0366096	0.00195865	0.00129606	-0.0271413	-0.0220915	-0.0444971	-0.027351	0.0240921	0.0537586	0.0351132	0.0766731	0.050187	0.0482185	0.0140654	0.0420754	0.0460901	-0.00340747	-0.0095485	-0.0392922	-0.034807	-0.0217	-0.0343357	0.0446149	0.0520039	0.00311329	0.0443457	0.0409255	-0.0407851	-0.061239	-0.0811113
0.00514434	0.0441114	0.0781015	0.0722395	0.0373803	0.0694107	0.0561536	0.104846	0.0930328	0.0449093	0.0812791	0.0182038	0.00340478	0.00918641	0.0246273	-0.00854499	0.0375465	0.00936292	0.0423581	0.0502291	0.0469785	0.0517598	0.0710582	0.0535026	0.1069	0.0214789	0.0301146	0.00148119	-0.003308	-0.0205236	-0.0119935	0.022209	-0.00323176	0.0087747	0.0369068	-0.00200343	-0.0383533	0.00752212	0.00808818
0.0786263	0.0546868	0.0568554	0.0226743	0.00731955	0.00166048	-0.00132718	-0.00611829	-0.01848	-0.0167189	0.0285974	-0.0180545	0.0148046	0.024429	0.0206392	-0.0204569	0.00531148	0.104113	0.0213715	0.0138639	0.00509247	-0.0373406	0.00198495	0.0166435	0.0738901	0.107968	0.0608408	-0.0141375	-0.00333819	-0.0235314	-0.0290733	-0.0363221	-0.00878167	0.0148995	-0.0235074	-0.00189233	-0.0280452	-0.0353439	0.00659252
0.584666	0.456857	0.488328	0.262749	0.372963	0.305439	0.255324	0.122154	0.176397	0.138836	0.0738988	0.169367	0.15164	0.154479	0.137639	0.520165	0.395765	0.654788	0.410208	0.413883	0.353743	0.23586	0.234944	0.32291	0.29765	0.42223	0.517999	0.196082	0.193338	0.259294	0.385623	0.381908	0.413484	0.380173	0.376748	0.399557	0.346024	0.413673	0.380262
0.0896914	0.0427153	0.0209455	0.0258137	0.0681003	0.0387297	0.0300311	0.038825	0.0716264	0.0461051	-0.0174817	0.0241548	-0.0028059	0.0157439	0.0248319	0.0276291	0.0325639	0.0356994	0.030063	0.083046	0.0943682	0.0786392	0.088548	0.0784969	0.0588648	-0.00965023	0.035007	0.0245691	0.0100433	0.0450441	0.0610028	0.0474524	0.0771043	0.0457102	0.0554256	0.115285	0.0744101	0.0359097	0.0246928
0.12826	0.157366	0.174489	0.209216	0.226102	0.241826	0.257951	0.230521	0.238483	0.0964906	0.10177	0.149215	0.115631	0.113639	0.130411	0.137096	0.112452	0.125704	0.129378	0.120251	0.106323	0.115372	0.0918621	0.131415	0.142476	0.197228	0.174257	0.0937513	0.0633394	0.0881879	0.192027	0.193895	0.200792	0.152612	0.147998	0.208425	0.187728	0.193512	0.189913
0.116465	0.173454	0.232924	0.129192	0.110143	0.168317	0.13361	0.062278	-0.0327708	0.0251767	-0.0490583	0.00219594	0.0473208	0.0255967	0.0174897	0.050355	0.175493	0.181031	0.192943	0.144122	0.189841	0.116022	0.1523	0.0661484	0.212013	0.195409	0.141607	0.000705187	-0.00370719	-0.00218315	0.137187	0.130997	0.156548	0.132055	0.123774	0.161035	-0.0164133	-0.00962434	-0.0048984
0.164054	0.160795	0.163672	0.127431	0.0765938	0.105454	0.110995	0.10681	0.120489	0.0654028	0.0935658	0.0810573	0.0135382	0.00254376	0.0289649	0.0613776	0.15423	0.175581	0.182227	0.132092	0.100299	0.123688	0.136676	0.196004	0.155547	0.0684848	0.132496	0.0163767	0.028726	0.0625724	0.0850012	0.136595	0.161372	0.18577	0.119109	0.0980661	0.0306143	0.0558154	0.0560132
0.106332	0.0596413	0.0652143	0.00164234	0.0445168	0.0451214	0.0290734	0.0165767	0.123822	-0.0701517	0.144439	0.0366064	0.0104797	0.00185532	0.00824951	0.0283351	0.0937445	0.149603	0.0262816	0.0497363	0.0181182	0.0208834	-0.0225283	-0.0255979	0.128371	0.1039	0.10288	-0.0158736	0.00751761	0.070676	0.0128568	0.0658356	0.0801397	-0.0335703	0.0531624	0.0159006	0.0350216	0.00613889	-0.0529078
0.449819	0.426998	0.381369	0.344897	0.390677	0.38655	0.339748	0.296847	0.240774	0.291166	0.208408	0.123303	0.208397	0.269175	0.220347	0.320358	0.426669	0.503862	0.521871	0.438408	0.468384	0.37356	0.417185	0.422999	0.362614	0.388358	0.331117	0.207186	0.201593	0.224607	0.409905	0.32029	0.334581	0.384305	0.377267	0.345139	0.243171	0.292791	0.312529
0.0129012	0.0519197	0.0785164	0.0703013	0.192099	0.126247	0.0888891	0.0179668	-0.0278586	-0.00632778	-0.0783319	0.014349	0.016729	0.014971	0.0128102	0.0666678	0.00791959	0.04381	0.0209193	-0.00806733	0.00546174	-0.0300222	-0.0118147	0.00101099	0.0286605	0.23256	0.135267	0.0248367	0.0235205	0.0158773	0.153733	0.0970612	0.0995101	0.100222	0.0418823	0.181994	0.145557	0.00594988	-0.00536131
0.128845	0.0893324	0.0948951	0.0601752	0.137458	0.0832635	0.0680854	0.0315596	0.0726925	0.0315615	0.0840046	0.0710586	0.0188184	0.0455558	0.0208691	0.102618	0.0696312	0.137831	0.0694797	0.149074	0.100577	0.0844912	0.0786316	0.0991822	0.065566	0.0906665	0.158321	0.047371	0.0416181	0.0610561	0.122696	0.167441	0.114846	0.0796157	0.12596	0.175945	0.26018	0.191144	0.138544
0.0673309	0.0663505	0.0819624	0.0652442	0.110497	0.0466912	0.0661089	0.04852	0.0653561	0.0573192	0.104383	0.0512202	0.0392725	0.0127371	0.022467	0.070428	0.0126649	0.0835366	0.0392383	0.0735006	0.0556292	0.0848649	0.0634707	0.0763869	0.0721546	0.0841801	0.122291	0.0302691	0.0231433	0.0383974	0.0477864	0.0274633	0.0493141	0.0608237	0.0590435	0.0859314	0.091875	0.0689143	0.0606006
0.117242	0.0581981	0.0402468	-0.0127688	0.0282033	0.0412846	0.00689342	0.00524405	-0.0461858	-0.0170521	0.0127092	-0.0199953	0.0168381	-0.00686189	0.00453086	0.0458609	0.0527163	0.1106	0.0898354	0.0748294	0.0599357	0.0747977	0.0706601	0.068049	0.0436502	0.0480041	0.0445754	-0.00440165	0.0184628	0.0776839	0.0607933	0.0620103	0.0574693	0.0388782	0.0311562	0.0698176	0.116417	0.078741	0.0463382
0.327569	0.298509	0.263554	0.282816	0.313428	0.306328	0.25938	0.120862	0.205512	0.223697	0.0453614	0.166791	0.266437	0.276727	0.268302	0.226354	0.290624	0.293254	0.29986	0.220819	0.218834	0.199185	0.179854	0.232725	0.25937	0.307019	0.333543	0.216709	0.299175	0.325609	0.356427	0.254968	0.288205	0.301399	0.26738	0.310104	0.212775	0.263973	0.261003
0.261451	0.29067	0.325445	0.28705	0.395151	0.296549	0.220872	0.163142	0.190445	0.0654418	0.0756855	0.119327	0.107576	0.0696592	0.0674768	0.185793	0.192943	0.338315	0.197133	0.120831	0.12453	0.0636566	0.0382775	0.0668027	0.230189	0.448862	0.452731	0.0562136	0.0538224	0.0768008	0.224111	0.27251	0.197711	0.235275	0.175211	0.321562	0.151233	0.123132	0.0975726
0.0116263	0.0271657	0.014906	0.0136619	0.0373676	0.0279081	0.017173	0.0159771	0.0176641	0.00752663	0.0312049	0.011697	0.00951307	-0.00314012	0.0355745	0.0084308	0.00357373	0.0109415	0.0133732	0.0165507	0.00578409	-0.00371221	0.00568886	0.0261357	0.0428854	0.0107061	0.0363254	0.00937784	-0.0135359	0.00431808	0.00487259	0.0756636	0.0397001	0.0183754	0.033353	0.0422092	-0.0155116	0.0291106	0.0377483
0.223944	0.153108	0.196323	0.162981	0.217184	0.184951	0.179598	0.0734426	0.0576212	0.0798496	0.0225705	0.102056	0.134854	0.11434	0.0451752	0.141586	0.131415	0.139665	0.137574	0.0867758	0.106672	0.0229499	0.0398691	0.100524	0.158639	0.230866	0.221538	0.108156	0.0670763	0.125211	0.22695	0.185421	0.163181	0.16012	0.145951	0.200895	0.139037	0.166377	0.143481
0.0485349	0.089797	0.0647147	0.0726009	0.0443761	0.105296	0.0797138	0.0676769	0.0683213	0.0987314	0.0463096	-0.00663103	0.0176799	0.0262147	-0.00868411	0.0244036	0.0358082	0.0850176	0.0594804	0.0192761	0.0281192	0.0333954	0.0251818	-0.00698407	0.0763515	0.128206	0.121874	0.014131	0.0169093	-0.0151238	0.024276	0.0501292	-0.0191462	0.0496691	0.0176011	0.0659858	0.00305212	0.0264087	0.0275256
0.141779	0.186196	0.14001	-0.0180639	-0.096945	-0.0623139	-0.0683679	0.0413399	-0.0909867	0.0491157	-0.0161313	-0.0767134	-0.0505453	-0.0289504	0.0361005	0.0477986	0.230325	0.166256	0.20615	0.309921	0.352219	0.281726	0.360315	0.298919	0.235818	-0.0654288	0.0218914	-0.00271183	-0.0412209	-0.0527324	-0.0960218	-0.061474	0.0224071	-0.0356553	0.0574751	-0.0282688	-0.184056	-0.0502959	-0.0311906
0.137838	0.0816866	0.114607	0.116701	0.172681	0.173211	0.127691	0.0727271	0.149414	0.0523542	0.157229	0.0552333	0.0697102	0.0659601	0.0695948	0.108829	0.0403891	0.190673	0.0816108	0.0439624	0.0898197	0.0534092	0.0823357	0.047557	0.113757	0.148532	0.145004	0.135733	0.0713164	0.0784881	0.138446	0.146319	0.0604317	0.158732	0.109215	0.148809	0.0133222	0.0325349	-0.000655622
0.28589	0.258631	0.271255	0.276902	0.224754	0.197933	0.167011	0.184651	0.205656	0.102082	0.153727	0.114107	0.0870444	0.0999183	0.0458395	0.134471	0.243063	0.243307	0.207713	0.167142	0.108925	0.12209	0.125172	0.116991	0.230481	0.142351	0.225601	0.0481224	0.0919013	0.188723	0.185647	0.218348	0.218297	0.247633	0.216356	0.188881	0.0871952	0.141006	0.144498
-0.000765595	0.0544959	0.0804131	0.0266249	0.0939374	0.135811	0.0680887	-0.069333	-0.0985457	-0.00314491	-0.122498	0.0198637	0.0956941	0.0640482	0.0982131	0.0848359	0.0316185	0.0866585	0.0891142	-0.00117805	0.0480309	-0.0347331	0.0136936	-0.0339181	-0.0326629	0.238212	0.0480599	0.0954362	0.0444324	-0.0679662	0.110165	0.0238479	0.0738651	0.109847	0.0327286	0.0768787	0.000378273	0.065143	0.0669657
0.326755	0.247008	0.199985	0.187336	0.162268	0.158815	0.142443	0.140217	0.244787	0.0867753	0.182273	0.148777	0.0882663	0.148292	0.0417974	0.169234	0.112422	0.258458	0.20635	0.20595	0.178362	0.204086	0.177417	0.185228	0.210063	0.114632	0.25415	0.130162	0.156107	0.213258	0.172904	0.182828	0.182282	0.185239	0.188364	0.206999	0.110474	0.0716394	0.0833498
0.361731	0.248481	0.222989	0.147111	0.235212	0.197304	0.155994	0.119242	0.146596	0.107631	0.0797988	0.103564	0.134901	0.104219	0.0957059	0.256704	0.144916	0.357902	0.233803	0.298548	0.277158	0.241	0.212652	0.268376	0.176539	0.270373	0.304362	0.142868	0.119087	0.164079	0.160127	0.230127	0.218161	0.181466	0.183167	0.300075	0.254538	0.217656	0.237531
0.0455412	0.0908637	0.131101	0.0750326	0.0850679	0.104874	0.0708904	-0.0343449	-0.0974604	0.0307148	-0.0896734	0.0498581	0.108861	0.0599424	0.0518651	0.130527	0.0659117	0.100908	0.0724585	0.0463452	0.0485245	-0.0361613	0.0272358	-0.0169145	0.0328272	0.258878	0.135938	0.0519677	0.0454534	-0.0060837	0.097173	0.0565722	0.00717619	0.0864422	0.059003	0.108784	-0.00986031	0.0709558	0.0990411
0.167644	0.153684	0.160835	0.214698	0.214983	0.129482	0.184982	0.213723	0.216411	0.0926342	0.0564739	0.100329	0.110827	0.119808	0.119324	0.0980346	0.0689616	0.135633	0.072383	0.128165	0.0953667	0.0905163	0.0501654	0.143061	0.168471	0.122966	0.19317	0.0809658	0.0559093	0.134448	0.169563	0.217322	0.174769	0.124073	0.136643	0.221835	0.194662	0.15649	0.177947
0.376234	0.349996	0.339676	0.295203	0.327426	0.261516	0.252438	0.187215	0.179757	0.184529	0.146934	0.195942	0.223016	0.226236	0.181045	0.290877	0.357691	0.399157	0.367768	0.332013	0.297195	0.270804	0.226111	0.259358	0.232174	0.369095	0.40885	0.210414	0.25317	0.328053	0.3012	0.3224	0.24542	0.304661	0.250191	0.283848	0.212861	0.224185	0.232617
0.0490077	0.0780318	0.126685	0.108994	0.318147	0.238383	0.234081	0.0933172	0.17022	-0.00833914	0.174474	0.136893	0.0815845	0.0661168	0.047555	0.0803494	0.0180343	0.100013	0.00784189	0.0357127	-0.00969011	0.0134043	-0.038926	0.0226761	0.0882975	0.193973	0.208062	0.0236983	0.0202439	0.0390165	0.181799	0.12179	0.153081	0.131352	0.147294	0.188017	0.111994	0.0147883	0.0485197
0.140153	0.176698	0.174074	0.112054	0.095893	0.113533	0.111021	0.059361	0.0415361	0.073249	0.0709371	0.03848	0.0915589	0.0603081	0.0747148	0.108985	0.256111	0.147439	0.192134	0.132456	0.136123	0.120417	0.0877005	0.0685823	0.202013	0.192514	0.0848782	0.0659769	0.0720962	0.00740055	0.11566	0.072001	0.0908625	0.101627	0.139634	0.0865153	0.0257753	0.0664561	0.0503634
0.169684	0.187244	0.117575	0.115802	0.0661361	0.0853777	0.0860091	0.126893	0.156822	0.058201	0.125502	0.0449619	0.042069	0.0561791	0.0447981	0.0945903	0.123167	0.155575	0.128717	0.149032	0.193733	0.163286	0.179501	0.156952	0.22757	0.0685183	0.103422	0.0605129	0.0337107	0.0623402	0.0886419	0.123026	0.17399	0.098955	0.140768	0.13238	0.0102366	0.0536663	0.100682

## Sheet: Change in fork dir CD tDNAs
rrm3_AA_1	rrm3_AA_2	rrm3_AA_2.1	rpc25_rrm3_1	rpc25_rrm3_2	rpc25_rrm3_3	rpc25_rpc82_rrm3_1	rpc25_rpc82_rrm3_2	rpc25_rpc82_rrm3_3	bdp1_rrm3_1	bdp1_rrm3_2	bdp1_rrm3_3	anccdr_away_1	anccdr_away_2	anccdr_away_3	rrm3KO_1	rrm3KO_2	rrm3KO_3	TLS_rrm3_1	TLS_rrm3_2	TLS_rrm3_3	rad18_rrm3_1	rad18_rrm3_2	rad18_rrm3_3	brn1_rrm3_1	brn1_rrm3_2	brn1_rrm3_2techrep	KO_wt_bkg_1	KO_wt_bkg_2	KO_wt_bkg_3	top1_rrm3_1	top1_rrm3_2	top1_rrm3_3	top2_rrm3_1	top2_rrm3_2	top2_rrm3_3	top1_top2_rrm3_1	top1_top2_rrm3_2	top1_top2_rrm3_3
0.196631	0.0997496	0.11377	0.0827218	0.138295	0.0794969	0.0908535	0.0565843	0.135748	0.035605	0.219984	0.0766686	0.126079	0.0929252	0.0829725	0.117387	0.0385635	0.15696	0.0914307	0.0981973	0.0489931	0.0440871	0.0628091	0.0619872	0.0579792	0.144079	0.0976187	0.0546424	0.129552	0.0922827	0.114191	0.167602	0.0589495	0.118054	0.10316	0.122647	0.103186	0.0648618	0.0921003
-0.0174632	0.0596755	0.113582	0.0279547	0.0638888	0.0913647	0.122753	-0.0344439	-0.17536	0.0072613	-0.129914	-0.0522723	0.177132	0.112637	0.124053	0.0988988	0.109988	0.0990645	0.0717009	0.0236989	0.0853381	-0.031431	0.0639522	-0.0319091	0.0693623	0.227722	0.104406	0.0617064	0.0071721	-0.0855777	0.0841399	0.00398228	0.0210243	0.0480962	-0.0139485	0.0147537	-0.0755637	0.0165995	0.0646568
0.107127	0.0316488	-0.0298854	-0.0293085	-0.024566	-0.0507679	-0.0126164	-0.0392855	0.0560729	-0.0475385	0.0583833	-0.0907795	-0.122335	-0.0842323	-0.0536537	0.045787	-0.00898864	0.0645902	-0.00326278	0.0518904	0.0340213	0.0448271	-0.00895247	0.063877	0.0409482	-0.0496395	0.0221351	0.0083727	0.00483491	0.0500015	-0.0277563	0.0256869	-0.00560089	-0.0571864	-0.00146631	0.0554548	-0.0048323	0.0064404	-0.0189034
0.0119451	0.0842326	0.0677304	0.0603622	0.0075789	0.0700973	0.0624032	0.0980758	0.0668786	0.0299923	0.0640603	0.0230899	-0.0259564	-0.00843538	-0.0242057	0.0218122	0.0553713	0.0083804	0.059444	0.0507186	0.084754	0.0773608	0.0852194	0.0836977	0.0839557	0.087364	0.100782	-0.0163275	-0.0226935	0.0158278	0.0344301	0.0599469	0.0685234	0.123037	0.0780391	0.096368	0.0265613	0.00647186	-0.0496341
-0.022082	0.00676896	-0.00137705	-0.00592549	-0.00919672	-0.0098292	0.0054287	-0.0244698	-0.0300429	-0.031342	0.042287	-0.0168905	0.00058452	-0.0131506	-0.0177123	-0.0024971	0.00262466	0.0193053	-0.00196358	-0.00536654	0.00186118	-0.0398399	-0.0160441	-0.0340842	-0.00995736	0.0139023	0.0224442	-0.00198557	-0.00731111	-0.0148391	-0.0255251	-0.0585382	-0.0575139	-0.0460598	-0.0155476	-0.0549158	-0.0731242	-0.053493	-0.0560386
-0.00984542	0.000888691	-0.000910678	-0.0115943	-0.0903551	-0.0256851	-0.0243837	-0.0473274	-0.00188385	-0.0162104	0.00658702	-0.0238854	0.00311848	-0.0223593	-0.0263625	-0.0329905	-0.00844838	-0.0139712	-0.00186652	-0.011662	-0.00868037	0.0204739	0.0051333	-0.00989664	0.000400906	-0.0140402	-0.0484625	-0.00881523	-0.00767679	-0.00786004	-0.112092	-0.0849225	-0.0639524	-0.0505818	-0.0353124	-0.0867298	-0.092919	-0.0296591	-0.011014
0.189323	0.0963778	0.0309849	0.0591172	-0.0405409	-0.0352495	-0.0293154	0.0548137	0.105537	-0.0160085	0.0522289	-0.0536759	-0.0179672	0.0187215	-0.00256785	0.00504512	0.0358463	0.0889724	0.0442793	0.207142	0.158661	0.145183	0.17806	0.209236	0.129737	-0.129619	0.055923	0.0250421	0.0203977	0.0300966	-0.0398749	0.0250471	0.060945	0.0156347	0.115097	-0.0057354	0.0175047	-0.00662722	-0.0530376
0.0225849	0.0173624	0.00940827	-0.0142476	-0.0407123	-0.0251996	-0.0489155	0.0136787	0.0239034	0.00307777	0.0689943	-0.0101338	0.00187832	0.0094159	-0.00456173	-0.0442227	-0.00685187	-0.00786987	0.0165342	0.00403138	0.0276306	-0.00126945	0.0208588	0.0186594	0.00770699	-0.0110518	-0.0295707	-0.00157744	-0.00687277	-0.0154431	-0.0741828	-0.109269	-0.0655794	-0.0709624	-0.0520897	-0.0837766	-0.0936179	-0.0405516	-0.0237421
0.114129	0.103218	0.125124	0.133176	0.122763	0.134596	0.0905557	0.0128275	0.0550004	0.0178959	0.00121439	0.0134547	0.0049229	0.0231888	0.0200827	0.0574923	0.0349331	0.080378	0.0598127	0.00318716	0.0667197	0.02886	0.0477588	0.0236938	0.112478	0.112427	0.125917	0.0317498	0.0314873	-0.00805927	0.139599	0.0974233	0.128679	0.0948089	0.110261	0.131568	0.0880779	0.0925922	-0.00418921
0.0283235	0.0414197	0.0384232	0.0398943	0.0909668	0.069221	0.0354671	0.0520922	-0.0426255	0.0120153	-0.0373575	0.0115146	0.0206061	0.00679915	0.00829332	0.0438894	-0.00995746	0.0386608	0.038636	0.0138151	-0.00638717	0.00120916	0.0224105	0.037042	0.0481144	0.0783149	0.0673924	0.0156958	0.0204836	0.00438393	0.052493	0.0298679	0.0268513	0.0636917	0.0165876	0.0688676	0.00899952	0.0933596	0.194618
0.138261	0.126741	0.104691	0.168513	0.149217	0.142368	0.0864016	0.0521209	0.0850483	0.0258591	0.0978972	0.0674441	0.0653414	0.0163673	-0.00802788	0.0467007	0.0284843	0.0930301	0.0947864	-0.0084229	0.0366203	0.0362594	0.0561008	0.0260396	0.109699	0.0567497	0.0514618	0.00922555	0.033297	0.0343697	0.0701762	0.0815249	0.0877865	0.0907785	0.0532692	0.0593674	0.0292388	0.012222	0.0305054
-0.0576199	-0.0198628	0.0161544	-0.0465616	-0.134232	-0.0690569	-0.0329314	-0.0271637	-0.0583295	-0.0330532	-0.040325	-0.0619316	-0.0469515	-0.0130054	-0.0352182	-0.141132	-0.0197168	-0.0804809	-0.0177469	-0.0520149	-0.0150889	-0.074476	-0.00906284	-0.020662	0.0255421	-0.141052	-0.102315	-0.0278565	-0.0210337	-0.172963	-0.0905143	-0.124279	-0.0780529	-0.111008	-0.0264159	-0.140836	-0.194879	-0.133199	-0.109892
0.243311	0.237848	0.237583	0.187764	0.24637	0.225	0.188612	0.164494	0.10092	0.0910375	0.0871217	0.118533	0.165682	0.14566	0.123155	0.187033	0.189067	0.249953	0.19588	0.150337	0.130768	0.121166	0.0978483	0.133711	0.209552	0.249896	0.285988	0.107477	0.107548	0.136215	0.221261	0.177196	0.194467	0.202997	0.142003	0.187158	0.104551	0.209788	0.233415
-0.00668032	0.00617574	-0.0345528	-0.0220393	-0.114495	-0.0539993	-0.0615677	-0.0286811	-0.00736143	-0.00487684	0.0420245	-0.077041	-0.0363379	-0.0429277	-0.0308118	-0.0520921	-0.0044019	-0.0146123	-8.39037e-05	0.0085911	0.00458154	-0.00124175	0.032238	0.0233155	0.0237137	-0.0556911	-0.0550734	-0.00918131	-0.0251035	-0.0446902	-0.14274	-0.127803	-0.0981856	-0.0893057	-0.0970693	-0.158193	-0.243042	-0.108204	-0.0755385
0.198371	0.220526	0.228603	0.203751	0.203588	0.222706	0.153653	0.0508562	0.124338	0.0479203	0.111003	0.0916431	-0.0007733	0.0126986	-0.039158	0.176412	0.126298	0.213361	0.194598	0.120884	0.166031	0.112729	0.102711	0.116545	0.189998	0.194924	0.224335	0.0221283	0.0507409	0.0918602	0.14747	0.155311	0.134428	0.200735	0.190217	0.112053	0.0154597	-0.0168293	-0.0697273
0.0532902	0.0416182	0.11069	0.119541	0.183679	0.14725	0.150167	0.0968176	0.0449449	0.0668876	0.0236705	0.0848021	0.163198	0.101925	0.0935868	0.0787499	0.044945	0.0867744	0.0497286	0.00506357	0.0363676	-0.0131035	-0.0133868	0.02327	0.0394493	0.250047	0.138974	0.0594817	0.0834818	0.109852	0.198825	0.132002	0.154082	0.0721343	0.101394	0.1397	0.152955	0.143973	0.172963
-0.273888	-0.0606936	-0.0721725	-0.0810487	-0.110593	-0.0576555	-0.059933	-0.124204	-0.220893	-0.0541035	-0.0981598	-0.0963369	-0.0282062	-0.00879133	-0.0186435	-0.0851653	-0.0496668	-0.101463	-0.0273535	-0.0936241	-0.0356819	-0.112647	-0.0496662	-0.100991	-0.0575109	0.0104836	-0.144554	-0.0246704	-0.029353	-0.226094	-0.131249	-0.120689	-0.0912034	-0.0965983	-0.0731262	-0.15154	-0.0535806	-0.0994445	-0.078024
0.147018	0.16369	0.168991	0.12408	0.103619	0.0924016	0.118756	0.112007	0.0859627	0.0577868	0.109308	0.0672115	0.0539519	0.0251543	0.0344255	0.0699236	0.136716	0.159562	0.192287	0.122101	0.103333	0.119566	0.134455	0.185578	0.141632	0.12163	0.132329	0.0178958	0.0309617	0.0401817	0.0850121	0.117421	0.133147	0.177929	0.106766	0.118512	0.0456344	0.0971467	0.0801982
0.219537	0.29257	0.300831	0.283401	0.312903	0.280137	0.236861	0.191491	0.162184	0.155774	0.0744229	0.185894	0.224157	0.210707	0.215175	0.178755	0.296992	0.232197	0.282628	0.277778	0.305695	0.205623	0.234478	0.180287	0.27179	0.383748	0.272272	0.161116	0.209691	0.168835	0.248446	0.238729	0.224029	0.259741	0.227817	0.254181	0.0973436	0.125443	0.161486
0.0537583	0.0165299	0.0204098	0.0272368	0.0254688	0.0361502	0.00644957	0.021463	0.0911795	0.00853168	0.0623279	0.0353203	0.0267301	0.00794396	0.00728202	0.0187303	0.00172121	0.0238296	0.00785151	0.042253	0.0232688	0.0316841	0.00952506	0.0315755	0.021264	0.0277834	0.0145786	0.01817	0.00883233	0.053472	0.0356728	0.0579449	0.0328409	0.0520486	0.0402533	0.0529384	0.0439309	0.0161779	0.0245672
0.0614676	0.0623824	0.0367136	0.0421102	0.100415	0.0662897	0.0684863	0.0662821	0.105757	0.052962	0.132097	0.0390639	0.0419054	0.0159509	0.0272781	0.0943822	0.0229054	0.0693589	0.0349608	0.0835208	0.0381958	0.0511862	0.0419041	0.0954425	0.0533229	0.0518962	0.0869976	0.0436784	0.0287043	0.100558	0.0164117	0.071263	0.0799047	0.0846476	0.0548504	0.0917866	0.124246	0.133931	0.086523
0.1055	0.0568138	0.0699766	0.0967975	0.0256044	0.0823935	0.0516619	0.0689592	0.147195	0.0431759	0.161512	0.0270675	0.040252	0.0472719	0.0067733	0.0361625	0.0308582	0.0380925	0.0237437	0.0829937	0.0380049	0.129154	0.0695517	0.0924902	0.0503778	0.00719306	0.0510996	0.014937	0.0581826	0.118214	0.0134648	0.09881	0.0322618	0.0435755	0.0880206	0.0486511	0.0211229	0.0743797	0.108411
0.0235464	0.0491097	0.00560144	0.010896	0.0137684	0.00241954	0.00605396	-0.0153758	0.00734346	-0.00242709	0.0686823	0.0296098	0.00813312	0.00882684	0.00576847	0.0273352	-0.0109914	0.00540811	0.024258	0.0288741	0.0185029	0.00599144	0.0236528	0.0107777	0.0321193	0.00617867	0.0122448	0.00874901	0.00212043	-0.0139385	-0.0229607	-0.00127709	-0.0480997	-0.0286255	-0.00178084	-0.0118068	-0.0723686	0.0394175	0.0118675
-0.0182971	0.0477207	0.0847813	0.00086932	0.0273891	0.0829676	0.0405485	-0.0618666	-0.14272	-0.0563797	-0.205223	-0.028013	0.0411635	0.0101075	0.0818822	0.0305037	0.0451383	0.0856393	0.0476271	-0.00662773	0.0277359	-8.85396e-05	-0.00813302	-0.0423556	-0.00933842	0.198713	0.0516659	0.0206823	0.0659055	-0.0839379	0.026819	-0.0335569	-0.000525938	-0.0352805	0.00411289	0.00732499	-0.0344564	-0.0884089	-0.0149956
0.0352355	0.0667989	0.0629567	0.0510325	0.0347256	0.0152241	0.0434963	0.000308364	0.0154637	0.0218539	0.0488143	-0.0122909	-0.00649826	0.0200432	0.027161	0.00386891	0.0568703	0.0605925	0.0503277	0.0309717	0.0331109	0.0408129	0.049164	0.0181142	0.110402	0.0329873	0.022732	0.00488292	0.0109968	-0.0389348	0.0081992	-0.000887374	-0.0114747	0.00323907	-0.0123864	0.01612	-0.0679412	-0.0457006	0.0441436
0.0431956	0.0411548	0.0590169	0.0369852	0.0435144	0.0363122	0.0335992	-0.0176593	-0.0072826	-0.0181616	-0.00262926	0.0249195	0.0312053	0.0101036	0.00724532	0.0679362	0.0305916	0.0743402	0.0482404	0.014096	0.0201262	-0.0322839	0.0144385	0.0045185	0.0400498	0.101174	0.0825889	0.0309102	0.0252304	0.0182432	0.079331	0.0318959	0.0427387	0.0693389	0.0562714	0.0517637	0.0733632	0.101932	0.123628
0.164363	0.158989	0.168033	0.155563	0.316627	0.227213	0.181382	0.137093	0.184593	0.0845017	0.103539	0.110055	0.0679802	0.0975991	0.089859	0.145814	0.0572085	0.113002	0.106253	0.107315	0.0724059	0.109266	0.0715084	0.150714	0.172583	0.14162	0.211173	0.0914084	0.0726069	0.121717	0.294811	0.298425	0.260935	0.252555	0.267423	0.296764	0.362613	0.34552	0.302745
-0.0106749	0.00963627	0.00986167	-0.00418085	0.055314	0.0183532	0.0242512	-0.0260011	-0.0316534	-0.00829374	-0.00302717	-0.0167956	0.0221353	0.0168169	0.00629324	0.00589191	0.00117918	0.01415	-0.00539315	-0.0134831	-0.0147913	-0.0367679	-0.00252041	-0.0333961	-0.00393137	0.0464722	0.0558582	0.0046449	-0.000896067	-0.00751766	0.0454139	0.0135765	0.0208669	0.0186185	0.0221205	0.034847	0.061391	0.0428373	0.0658105
-0.35788	-0.432471	-0.388781	-0.297101	-0.175799	-0.1364	-0.172296	-0.233287	-0.0562104	-0.286028	-0.0779574	-0.160006	-0.435447	-0.42769	-0.412023	0.0786976	-0.0298164	0.0190798	-0.459223	-0.403291	-0.43653	-0.379266	-0.440882	-0.38621	-0.427654	-0.31467	-0.318391	0.0271391	-0.0238417	0.0198636	-0.297813	-0.276853	-0.306775	-0.343879	-0.311069	-0.264349	-0.0522183	-0.272964	-0.320615
0.0440662	0.00775651	0.0276282	0.0429291	0.0735212	0.0262	0.0180439	0.0664242	0.171273	0.0171474	0.0724398	0.0473286	-0.00778776	0.00983999	0.00100609	0.0228294	0.020654	0.0241999	0.0168516	0.0350753	0.0388647	0.0444784	0.0217134	0.0379764	0.0250724	-0.0608273	0.0375507	0.00427381	0.0120601	0.0700087	0.000481697	0.0837345	0.0208551	0.0155127	0.0277408	0.0669561	0.0657907	0.0569998	0.0317248
0.0892888	0.0756417	0.0969599	0.0929192	0.142568	0.105006	0.029598	0.0065374	-0.0285049	-0.00904558	0.0512733	-0.0200258	0.0401572	0.0268874	0.0209068	0.0472466	0.0706871	0.133764	0.0590656	0.03483	0.0372197	-0.0147114	0.0135868	-0.00813437	0.0607828	0.209823	0.165621	0.0196546	0.0183844	-0.0218667	0.0541397	0.0114938	-0.00181012	0.00698677	0.0351593	0.0570334	0.0213885	0.0114091	0.0550322
0.117009	0.0970102	0.0608766	0.0693049	0.0290327	0.0999124	0.0469887	0.0441678	0.102257	0.0298044	0.0476183	0.011465	0.0369531	0.0357163	0.0094689	0.0654695	0.0322689	0.0655114	0.0299026	0.0666114	0.051551	0.0382847	0.0404625	0.0325376	0.0812716	0.0729329	0.10104	0.025753	0.00214948	0.0603179	0.0817745	0.104864	0.0765603	0.0889362	0.0842896	0.10244	0.0668932	0.0214818	0.0443766
0.026058	0.0224417	0.0331225	0.0267886	0.0903959	0.0564832	0.0540753	0.0155414	0.0692787	0.0323498	-0.0350013	0.0379292	0.0213623	0.050025	0.00961709	0.0573111	0.00677266	0.0335965	-0.0249137	0.0154457	-0.0153744	-0.00658609	-0.0340851	-0.00871211	0.025086	0.0353695	0.118672	0.0126085	0.0115844	0.0797329	0.0842865	0.0923033	0.076616	0.0458713	0.0676024	0.152365	0.133909	0.100586	0.051645
0.045928	0.0313334	0.0493926	0.0164982	0.00820346	0.0125363	-0.00547846	0.0525069	0.0787147	0.00975136	0.120823	0.0282823	0.0343457	0.0192215	0.0202723	0.00230611	0.0305775	0.0191772	0.012602	0.0175621	0.0338333	0.00131846	0.0301478	0.0181235	0.0321915	0.0498572	0.0381572	0.000580327	0.00494605	0.00324608	0.000895088	-7.87667e-05	0.011932	-0.0284539	0.0340298	-0.00798247	-0.0758799	-0.0201004	0.0171363
0.0115456	0.018884	0.0271028	0.0122522	0.0339734	-0.00552941	-0.00369768	-0.00554127	-0.0258507	-0.00191802	-0.00663828	-0.00311359	0.0274843	0.00182796	-0.0154928	0.0346936	0.013478	0.0255267	0.0265211	0.0154056	0.0251442	-0.00875957	0.0210141	0.0223349	0.0135826	0.0382088	0.0225583	0.00844595	0.00669861	-0.0112407	-0.014259	-0.0218159	-0.0235279	-0.0474474	-0.0212344	0.0155488	-0.020912	0.0279001	0.0201859
0.0285943	0.000922155	0.034769	0.0107675	0.0225876	0.0961456	0.0459298	-0.0461453	-0.106677	-0.00063558	-0.0122237	-0.024699	0.0485829	0.0262435	0.034985	0.137121	0.0434777	0.0830578	0.0366359	0.0283263	0.0339026	-0.0350939	-0.00750785	-0.0164583	0.0132076	0.16775	0.063733	0.0725274	0.0566636	-0.0247757	0.0396565	-0.0858457	-0.0161247	0.0134285	0.0163713	-0.0162266	0.0172603	0.0570508	0.157389
-0.0964561	-0.100701	-0.0964968	-0.113587	-0.256821	-0.176605	-0.164488	-0.112362	-0.188893	-0.0592237	-0.0301594	-0.157218	-0.157035	-0.114211	-0.121692	-0.163943	-0.0719703	-0.111553	-0.0593706	-0.0103553	-0.0297735	-0.0748553	-0.0235406	-0.0896928	0.0114119	-0.154076	-0.191362	-0.0420175	-0.103666	-0.176885	-0.199805	-0.207631	-0.163784	-0.193706	-0.134331	-0.162024	-0.261037	-0.251827	-0.199251
0.0935847	0.134446	0.143651	0.0843137	0.119697	0.0820963	0.0832708	0.051074	0.0820555	0.086145	0.190205	0.0380961	0.0836331	0.0192274	0.0832615	0.0817918	0.0737184	0.0729788	0.116302	0.129405	0.104333	0.0878241	0.101821	0.0942504	0.141237	0.112417	0.0255105	0.0478499	0.0422498	0.0166989	0.0760241	0.0339138	0.0951489	0.0605066	0.146429	0.0451753	0.0140354	0.0699569	0.0693374
0.0304322	0.0538206	0.0883644	0.0373338	0.0646078	0.0484766	0.0499952	-0.0182141	-0.0758518	-0.0417214	-0.0173515	-0.00901371	0.0540597	0.0412124	0.0487798	-0.0658719	0.0258905	0.0457674	0.0208663	-0.0232526	-0.00381697	-0.0288409	0.00769433	-0.047636	0.0463226	0.095049	0.0304316	-0.0142278	-0.0111783	0.000212625	0.0684744	0.0486951	0.0265522	0.0190586	0.0203101	0.0433836	0.0465081	0.0202072	0.0464667
-0.0367897	0.0334816	0.062216	0.0605778	0.0566397	0.0449347	0.0024504	0.0167393	-0.0785549	0.0266225	-0.0477085	-0.0126416	0.0453099	0.0287832	0.0352243	-0.00220785	0.0383522	-0.0208932	0.0586787	0.0274739	0.0710192	-0.0167769	0.0599968	0.0212453	0.0591398	0.0727332	0.0368814	-0.0240038	0.0358642	-0.0683617	0.0381679	-0.0273668	0.0180997	0.0326547	0.0242067	-0.00785346	-0.0598543	-0.0598921	-0.0506304
0.278889	0.249889	0.143455	0.225875	0.139013	0.197424	0.153571	0.218433	0.256471	0.131342	0.196252	0.128042	0.0520715	0.0379487	0.0450914	0.228417	0.292836	0.250288	0.245614	0.271158	0.24045	0.306603	0.264734	0.258458	0.226903	0.0979259	0.186781	0.0734442	0.0663174	0.129027	0.135582	0.233472	0.155826	0.198842	0.206036	0.231347	0.133357	0.127945	0.087934
0.244275	0.19117	0.189332	0.126781	0.160956	0.140541	0.134716	0.0738322	0.0612802	0.145863	0.0712249	0.0668933	0.118505	0.159153	0.141491	0.120865	0.174981	0.232735	0.202104	0.202141	0.223038	0.10878	0.143632	0.160317	0.121668	0.166971	0.177225	0.151153	0.130203	0.127404	0.234815	0.227326	0.213841	0.108831	0.114594	0.190803	0.161028	0.223082	0.180737
0.186126	0.141869	0.120005	0.169326	0.0742844	0.0751321	0.0804648	0.102833	0.227558	0.124375	0.0906731	0.0698747	-0.0155441	0.0454286	0.0937152	0.0551201	0.113964	0.0967683	0.0825483	0.168612	0.108991	0.0497595	0.100516	0.175629	0.175687	0.00743906	0.122809	0.0345617	-0.00748688	0.0466218	0.102613	0.109302	0.11896	0.0885903	0.0983317	0.105611	0.0570493	0.0649182	0.0932283
0.0197057	0.0402746	0.0598726	0.02953	0.125937	0.0913967	0.10801	-0.0107951	-0.0152672	0.0224853	-0.0242083	0.0278709	0.0519799	0.0502119	0.0532475	0.0614705	0.0178737	0.0680675	0.042029	-0.0117219	-0.00802904	-0.0420718	-0.00843927	-0.0478969	0.0182042	0.197515	0.0764105	0.0302493	0.037031	-0.0130714	0.121691	0.0760188	0.0518722	0.0456484	0.0893347	0.0895575	0.0919647	0.0514867	0.0675988
0.00960854	-0.0014786	0.0150587	-0.012418	0.14124	0.0439184	0.0222154	-0.0399936	-0.0574926	-0.0790386	-0.0699073	0.0334455	0.0401419	0.0144172	-0.0110217	0.100879	4.98277e-05	0.0314044	-0.00869708	-0.02799	-0.0465043	-0.0771609	-0.0751829	-0.0771513	-0.0202222	0.113762	0.0543535	-0.0354847	0.0261091	0.0649708	0.0586439	0.0935043	0.0392363	0.0462919	0.029952	0.0843866	0.177282	0.074763	0.0728461
0.0467855	0.045891	0.0364002	0.00297741	0.00777635	0.0116995	0.00192731	-0.00734726	-0.0112958	0.00979745	-0.0188315	-0.0265241	0.0524114	0.0259621	0.0136232	0.0149144	0.00547516	0.04721	0.0280099	0.0379039	0.0150956	-0.00861029	0.0101491	-0.00896888	0.0327161	0.0783687	0.0303403	0.0197747	0.01265	-0.0297042	0.0260283	0.0334959	0.00961852	0.0189863	-0.0149948	0.0501784	0.0213963	0.0285653	0.0472229
-0.0896838	0.0110712	0.0458851	0.0491178	0.212239	0.111568	0.0743771	0.0399248	0.0115147	-0.0256765	0.0340455	0.0477654	0.0323896	-0.00821388	-0.000298959	0.021404	-0.0200089	-0.0437543	0.00184041	-0.0318977	-0.024165	-0.0483059	-0.0720058	-0.0741154	-0.0123233	0.0837979	0.0794712	-0.0559337	-0.00589136	0.00360364	0.0981414	0.0777948	0.0519559	0.0258919	0.0252657	0.0843913	0.0982259	0.00911516	-0.0102487
0.120039	0.0342949	0.0409677	0.078474	0.10977	0.115358	0.0305993	0.0398298	0.0335264	0.0576856	0.0271439	0.0219902	-0.0192927	-0.0124107	0.00601823	0.101326	0.0767698	0.134751	0.171295	0.170183	0.128707	0.139059	0.137837	0.168777	0.0347288	0.0378108	0.12568	0.0940857	0.0701032	0.124233	0.0598933	0.108716	0.0687044	0.0917011	0.0493842	0.108904	0.010759	0.0959748	0.100067
0.120591	0.0603889	0.0742274	0.0786981	0.192114	0.084799	0.0924476	0.0514211	0.12457	0.0313944	0.0751348	0.0770688	0.0308379	0.0511037	0.0626985	0.110855	0.0206186	0.0673594	0.0298852	0.0500085	0.0215215	0.0257591	0.0111559	0.0584817	0.0435351	0.110663	0.141549	0.049601	0.0448816	0.118167	0.12882	0.159805	0.165432	0.135979	0.0914484	0.187425	0.20266	0.165022	0.177472
0.196945	0.133155	0.161705	0.117729	0.23569	0.208686	0.144535	0.0462488	0.0337088	0.0664575	0.0623132	0.122544	0.108976	0.139443	0.121726	0.218133	0.102313	0.221956	0.0894735	0.09282	0.078409	-0.0179068	0.0191418	0.0627387	0.0771047	0.254663	0.26639	0.1167	0.0894464	0.172163	0.246041	0.187924	0.191675	0.149494	0.157362	0.229808	0.238823	0.315443	0.300086
0.155786	0.219999	0.242829	0.211904	0.127812	0.138976	0.163542	0.164623	0.156991	0.0887806	0.0965982	0.0500409	0.0930206	0.0583091	0.104569	0.0770529	0.216904	0.140776	0.239177	0.223113	0.203595	0.205005	0.245093	0.194077	0.242697	0.152077	0.174793	0.0444476	0.077439	0.0694207	0.12524	0.10919	0.112867	0.187041	0.200907	0.149894	-0.0223183	0.0103625	0.0271136
0.0561468	0.0704439	0.0833526	0.0466903	0.00197966	0.0605541	0.0408186	0.0447987	0.0548166	0.0400441	0.0622012	0.023804	0.0360407	0.0416609	0.0880157	0.053549	0.0699162	0.109969	0.0340493	0.0523016	0.0411679	0.0538022	0.0490435	0.0364258	0.0795909	0.103478	0.0629172	0.0330976	0.0260549	0.0461273	0.0677209	0.0545184	0.0818942	0.0446315	0.0273914	0.0213683	-0.0198558	0.0833236	0.1103
0.242313	0.140282	0.163925	0.113029	0.0924166	0.0634598	0.0975369	0.0255838	0.102313	0.0719658	0.0561302	0.0860662	0.0846434	0.120619	0.0651522	0.112409	0.128657	0.232058	0.144302	0.158307	0.133228	0.15026	0.118042	0.190461	0.0752834	0.151207	0.177106	0.119354	0.106453	0.165805	0.110768	0.0883985	0.0797109	0.121298	0.181043	0.120091	0.110715	0.172987	0.139676
-0.00771207	-0.0180253	-0.0290576	0.00108638	0.0215667	-0.00484248	0.0142138	0.0170263	-0.00203828	0.00311552	-0.0465799	-0.0172572	-0.0440139	-0.0133568	-0.031777	-0.0145742	-0.0400417	-0.0108223	-0.0063297	-0.00824662	-0.0150648	-0.0421389	0.0204354	-0.00591442	-0.0470864	-0.0157991	0.0139592	-0.0092006	-0.0109675	-0.00775583	0.00794225	0.028599	0.00422395	0.037726	0.0205627	0.0288061	0.0355932	0.0313485	0.0302282
